# Supplementary material for: Identification of the optimal points for the acupuncture treatment of neck pain in China: protocol for a multicenter, matched, case-control study
Source: PubMed Central journal article supplement — BMJ Open. 2019 Aug 21;9(8):e029194. doi: 10.1136/bmjopen-2019-029194 (PMC6707690; doi:10.1136/bmjopen-2019-029194), 2019-08-21
Supplement: bmjopen-2019-029194.draft_revisions.pdf [file bmjopen-2019-029194.draft_revisions.pdf]

# BMJ Open

BMJ Open is committed to open peer review. As part of this commitment we make the peer review history of every article we publish publicly available.

When an article is published we post the peer reviewers' comments and the authors' responses online. We also post the versions of the paper that were used during peer review. These are the versions that the peer review comments apply to.

The versions of the paper that follow are the versions that were submitted during the peer review process. They are not the versions of record or the final published versions. They should not be cited or distributed as the published version of this manuscript.

BMJ Open is an open access journal and the full, final, typeset and author-corrected version of record of the manuscript is available on our site with no access controls, subscription charges or pay-per-view fees (<http://bmjopen.bmj.com>).

If you have any questions on BMJ Open's open peer review process please email [info.bmjopen@bmj.com](mailto:info.bmjopen@bmj.com)

# BMJ Open

## Identification of the optimal points for the acupuncture treatment of neck pain in China: protocol for a cross-sectional, matched, case-control study

|                               |                                                                                                                                                                                                                                                                                                                                                                                                                                                                                                                                                                                                                                                                                                                                                                                                                                                                                                                                                                                                                                                                                  |
|-------------------------------|----------------------------------------------------------------------------------------------------------------------------------------------------------------------------------------------------------------------------------------------------------------------------------------------------------------------------------------------------------------------------------------------------------------------------------------------------------------------------------------------------------------------------------------------------------------------------------------------------------------------------------------------------------------------------------------------------------------------------------------------------------------------------------------------------------------------------------------------------------------------------------------------------------------------------------------------------------------------------------------------------------------------------------------------------------------------------------|
| Journal:                      | <i>BMJ Open</i>                                                                                                                                                                                                                                                                                                                                                                                                                                                                                                                                                                                                                                                                                                                                                                                                                                                                                                                                                                                                                                                                  |
| Manuscript ID                 | bmjopen-2019-029194                                                                                                                                                                                                                                                                                                                                                                                                                                                                                                                                                                                                                                                                                                                                                                                                                                                                                                                                                                                                                                                              |
| Article Type:                 | Protocol                                                                                                                                                                                                                                                                                                                                                                                                                                                                                                                                                                                                                                                                                                                                                                                                                                                                                                                                                                                                                                                                         |
| Date Submitted by the Author: | 16-Jan-2019                                                                                                                                                                                                                                                                                                                                                                                                                                                                                                                                                                                                                                                                                                                                                                                                                                                                                                                                                                                                                                                                      |
| Complete List of Authors:     | Sun, Mingsheng; Chengdu University of Traditional Chinese Medicine, College of Acupuncture and Tuina<br>Tao, Siyuan; Sichuan University, West China School of Public Health<br>Geng, Guoyan; Chengdu University of Traditional Chinese Medicine, College of Acupuncture and Tuina<br>Peng, Jieru; Sichuan University, West China School of Public Health<br>Ma, Xingsha; Chengdu University of Traditional Chinese Medicine<br>Yan, Mingxi; Chengdu University of Traditional Chinese Medicine<br>Chen, Jiao; Chengdu University of Traditional Chinese Medicine, College of Acupuncture and Tuina<br>Cai, Dingjun; Chengdu University of Traditional Chinese Medicine<br>Zheng, Hui ; Chengdu University of Traditional Chinese Medicine,<br>Yang, Chunxia; Sichuan University, West China School of Public Health<br>Zhao, Ling; Chengdu University of Traditional Chinese Medicine, Acupuncture and Tuina School<br>Liang, Fan-rong; Chengdu University of Traditional Chinese Medicine, Acu-moxibustion and Tuina school; Chengdu University of Traditional Chinese Medicine |
| Keywords:                     | sensitized points, neck pain, study protocol, observational study                                                                                                                                                                                                                                                                                                                                                                                                                                                                                                                                                                                                                                                                                                                                                                                                                                                                                                                                                                                                                |
|                               |                                                                                                                                                                                                                                                                                                                                                                                                                                                                                                                                                                                                                                                                                                                                                                                                                                                                                                                                                                                                                                                                                  |

SCHOLARONE™  
Manuscripts

1  
2  
3  
4 **Identification of the optimal points for the acupuncture treatment of neck pain**  
5 **in China: protocol for a cross-sectional, matched, case-control study**

6  
7 Ming-Sheng Sun<sup>1†</sup>, Si-Yuan Tao<sup>2†</sup>, Guo-Yan Geng<sup>1†</sup>, Jie-Ru Peng<sup>2</sup>, Xing-Sha Ma<sup>1</sup>, Ming-Xi Yan<sup>1</sup>,  
8  
9 Jiao Chen<sup>1</sup>, Ding-Jun Cai<sup>1</sup>, Hui Zheng<sup>1</sup>, Chun Xia Yang<sup>2</sup>, Ling Zhao<sup>1\*</sup>, Fan-Rong Liang<sup>1\*</sup>  
10  
11

12  
13 † Ming-Sheng Sun, Si-Yuan Tao, and Guo-Yan Geng contributed equally to this work.  
14  
15

16  
17 <sup>1</sup> College of Acupuncture and Tuina, Chengdu University of Traditional Chinese Medicine,  
18  
19 Chengdu, 610075, China  
20

21 <sup>2</sup> West China School of Public Health, Sichuan University, Chengdu, 610041, China  
22  
23

24  
25 **\*Corresponding authors**

26  
27 Professor Ling Zhao

28  
29 Postal address: 37 Shierqiao Road, Chengdu, Sichuan, China

30  
31 Telephone: +86 13568801429

32  
33 Email: [ling94@163.com](mailto:ling94@163.com)  
34  
35

36  
37 Professor Fan-Rong Liang

38  
39 Postal address: 37 Shierqiao Road, Chengdu, Sichuan, China

40  
41 Telephone: +86 13608058216

42  
43 Email: [acuresearch@126.com](mailto:acuresearch@126.com)  
44  
45

46  
47 **Word count:** 2786 words  
48  
49

50  
51 **Keywords:** sensitized points, neck pain, study protocol, observational study  
52  
53  
54  
55  
56  
57  
58  
59  
60

## ABSTRACT

**Introduction:** Neck pain is a common condition that can be effectively treated by acupuncture. However, acupuncture for neck pain can be performed using various treatment point options (such as local acupoints, distal acupoints, and sensitized acupoints). It remains controversial which treatment point selection produces superior relief of neck pain. The present study aims to identify the types of sensitization (e.g. temperature, tenderness) and distribution of sensitized points in patients with neck pain, to analyze the cutoff values and sensitization rate for acupoint sensitization in patients with neck pain, and to summarize the dominant forms of optimal sensitized points in patients with neck pain. This information will aid in the choice of optimal treatment points for neck pain.

**Methods and analysis:** This cross-sectional, matched, case-control study will include 224 patients with neck pain, and 224 healthy age- and sex-matched control subjects. Body surface temperature, mechanical pain threshold, pressure pain threshold, and skin resistance will be assessed at the 15 acupoints most frequently used to treat neck pain, and at the five body regions in which pain most frequently occurs. Hypothesis testing will be used to compare the differences in variables between cases and controls. In addition, receiver operating characteristic curve analysis will be used to explore the cutoff values of the sensitive states of heat, pain, and electrical resistance that indicate sensitization of the acupoint.

**Ethics and dissemination:** Ethical approval of this study has been granted by the Research Ethical Committee of the Teaching Hospital of Chengdu University of Traditional Chinese Medicine (ID: 2018KL-016). The outcomes of the study will be disseminated through peer-reviewed publications.

**Trial registration:** ChiCTR1800016220.

### Strengths and limitations of this study

► This study will be the first observational study to evaluate the forms of sensitization and the distribution of sensitized points in patients with neck pain. To summarize the dominant forms of sensitized points related to neck pain, the study will evaluate the skin morphological changes, body surface sensations, and biophysical properties.

► This study will be the first to attempt to define the acupoint sensitization in patients with neck pain using a cutoff value for the identification of point sensitization.

1  
2  
3  
4 ▶ As this is the first study of its kind, only patients with simple neck pain were included; patients  
5 with other types of neck pain, such as secondary neck pain, were excluded to reduce the bias caused  
6 by other factors and ensure consistency. However, this will limit the representativeness and  
7 generalizability of the study results.  
8  
9  
10

## 11 12 13 **INTRODUCTION**

14  
15 Neck pain is a common clinical condition that is often accompanied by tenderness at sensitive points  
16 and limited function. The lifetime prevalence of neck pain is reportedly 48.5%. [1] Neck pain can  
17 be caused by cervical spondylosis, which is a common disease in China with a prevalence of 8.1–  
18 19.1%. [2] Neck pain imposes considerable personal and socioeconomic burdens. Furthermore, the  
19 incidence of cervical spondylosis has been increasing in recent years due to changes in work and  
20 lifestyle habits, leading to a prolonged work life and lifespan; this increased incidence has become  
21 a social concern. Neck pain is often treated with muscle relaxants and non-steroidal anti-  
22 inflammatory drugs; however, such medications carry a risk of adverse effects, and neither drug is  
23 better than non-pharmacological alternative treatments. [1]  
24  
25  
26  
27  
28  
29  
30  
31

32  
33 As non-pharmacological alternative treatments have reliable efficacy and availability, this type of  
34 treatment is gaining an increasing amount of recognition worldwide. Acupuncture is one type of  
35 non-pharmacological alternative treatment that can effectively treat neck pain. Although various  
36 studies have confirmed that acupuncture is effective, the outcome of acupuncture treatment is  
37 closely related to the point selections. [3] Previous studies have evaluated the use of local  
38 acupoints [4] or distal acupoints, [5] with all types of treatment points reportedly having a certain  
39 degree of clinical efficacy.  
40  
41  
42  
43  
44  
45

46  
47 Recent Chinese research has found that acupoints can be sensitized, with associated changes in  
48 function and size, and thus can functionally switch from a relatively ‘silent’ state to a relatively  
49 ‘active’ state. Treatment of an acupoint while it is in the ‘active’ state is thought to achieve a better  
50 clinical outcome, and this has become a focus in acupoint research. [6-8] There are diverse types of  
51 sensitivity manifested at sensitized points, including pain-sensitivity, heat-sensitivity, and form-  
52 sensitivity. Recent clinical studies report that a superior outcome is obtained using acupuncture at  
53 pain-sensitive points, [9] and moxibustion at heat-sensitive points [10] or visual-sensitive points. [11]  
54  
55  
56  
57  
58  
59  
60 However, most of the current observational studies have only focused on one form of sensitization

1  
2  
3  
4 in a small sample population, and thus are not comprehensive studies of various forms of  
5 sensitization.[6 10] The choice of optimal treatment points for neck pain in clinical practice is still  
6  
7 controversial.

8  
9 Herein, we describe the protocol for an observational study that aims to identify the different types  
10  
11 of sensitization (e.g. temperature, tenderness) and the distribution of sensitized acupoints in patients  
12  
13 with neck pain, to analyze the cutoff values for acupoint sensitization in patients with neck pain,  
14  
15 and to determine the most prevalent sensitization types seen at sensitized points in patients with  
16  
17 neck pain. Previous small sample studies have confirmed the feasibility of sensitization testing.[7]  
18  
19 The present study will provide a basis for the selection of the optimal treatment points for neck pain  
20  
21 in clinical practice.  
22  
23  
24

## 25 **METHODS AND ANALYSIS**

### 26 **Study design**

27  
28 This is a cross-sectional, age- and sex-matched, case-control study. The protocol was developed in  
29  
30 accordance with the Strengthening the Reporting of Observational Studies in Epidemiology  
31  
32 guidelines.[12] The study has been registered with ChiCTR at Current Controlled Trials  
33  
34 (ChiCTR1800016203). A flowchart of the study design is shown in Figure 1.  
35  
36  
37  
38

### 39 **Ethics**

40  
41 This study was designed in accordance with the principles of the Declaration of Helsinki. The study  
42  
43 protocol has been approved by the Ethics Committee of the First Affiliated Hospital of Chengdu  
44  
45 University of Traditional Chinese Medicine (approval number: 2018KL-016), and is registered on  
46  
47 the primary registry in the World Health Organization registry network (Chinese Clinical Trial  
48  
49 Registry: no. ChiCTR1800016203). Signed consent will be obtained from each participant after  
50  
51 they have been informed of the study procedures, possible risks, and their right to withdraw from  
52  
53 the study.  
54  
55

### 56 **Patients and healthy subjects**

#### 57 **Inclusion criteria**

58  
59 Patients are eligible for study inclusion if they: (1) have simple neck pain with symptoms that meet  
60

1  
2  
3  
4 the diagnostic criteria for cervical spondylosis; (2) are males or females aged 18–60 years; (3)  
5 provide written informed consent for all procedures in this study.  
6  
7  
8

9  
10 Healthy subjects are eligible if they: (1) have no history of neck pain and/or restricted neck  
11 movement; (2) are males or females aged 18–60 years; (3) provide written informed consent for all  
12 procedures in this study.  
13  
14  
15

### 16 17 **Exclusion criteria**

18  
19 Patients are not eligible if they: (1) have complicated neck or shoulder pain caused by cervical and  
20 intervertebral disc degeneration, such as other types of cervical spondylosis, shoulder peri-arthritis,  
21 rheumatic myofibrillar inflammation; (2) have history of neck fracture or surgery, or cervical  
22 congenital abnormality; (3) have serious disease related to the heart, liver, kidney, or hematopoietic  
23 system; (4) have difficulty in answering the questionnaires because of cognitive impairment; (5)  
24 have dermatopathic diseases; (6) are pregnant, breastfeeding, or planning a pregnancy during the  
25 study period.  
26  
27  
28  
29  
30  
31  
32  
33  
34

35 Healthy subjects are not eligible if they: (1) have serious disease related to the heart, liver, kidney,  
36 or hematopoietic system; (2) have cervical congenital abnormality; (3) have difficulty in answering  
37 the questionnaires because of cognitive impairment; (4) have dermatopathic diseases; (5) are  
38 pregnant, breastfeeding, or planning a pregnancy during the study period.  
39  
40  
41  
42  
43  
44

### 45 **Recruitment strategies**

46 We will recruit patients from the outpatient departments of Acupuncture and Moxibustion, and  
47 Orthopedics in five clinical centers in China: Chengdu University of Traditional Chinese Medicine,  
48 Hunan University of Traditional Chinese Medicine, Shaanxi University of Traditional Chinese  
49 Medicine, Shanxi University of Traditional Chinese Medicine, and Guiyang College of Traditional  
50 Chinese Medicine. Healthy subjects without neck or shoulder pain will comprise age- and sex-  
51 matched residents from the same communities as the patients. Recruitment strategies will include  
52 posting advertisements on social media (such as WeChat, which is similar to Facebook) and at  
53 community centers, or by word-of-mouth introductions through subjects already enrolled in the  
54  
55  
56  
57  
58  
59  
60

study. Patients or healthy subjects who consent to study participation will be examined and diagnosed by a hospital doctor.

### Test regions, acupoints, and sensitized points

In accordance with the results of literature data-mining and expert consensus on the treatment of neck pain, we identified the 15 most frequently used acupoints (Table 1) and the five regions of the body with the most frequent occurrence of pain and the greatest degree of acupoint sensitization. The body was divided into five regions to standardize the treatment procedures and detection areas. Regions 1 and 2 are each bordered by the respective ipsilateral mastoid, sternal end of the clavicle, anterior axillary line, acromion, and C7 spinous process. Region 3 is the triangular region bordered by both sides of the mastoid and the C7 spinous process. Regions 4 and 5 are each bordered by the respective ipsilateral C7 spinous process, acromion, and axillary line; the two regions are divided by the posterior midline. These regions are the same as those used in previous studies on neck pain,[13] and include the upper trapezius, splenius capitis muscles, sternocleidomastoid, levator scapulae, infraspinatus, scalene, subscapularis muscles, and other neck muscles associated with neck pain.[14 15] These regions and acupoints are shown in Figure 2.

Investigators will mark the 29 acupoints on each patient. All investigators will attend training to make sure all practices are standardized. And the investigator was not told whether the subject was a patient or a healthy controls. The investigator will then palpate the detection area associated with each acupoint using the appropriate force (< 2,000 gf), and will identify the sensitized points that have pain/sourness/heaviness/fullness or nodules.

**Table 1** Acupoints selected for use in the study

| Acupoints           | Location                                                                                                                                             |
|---------------------|------------------------------------------------------------------------------------------------------------------------------------------------------|
| Jianjing (GB-21)    | On the shoulder, directly above the nipple, at the midpoint of the line connecting Dazhui(DU-14) with the acromial end of clavicle                   |
| Jianzhongshu(SI-15) | On the back, 2 cun lateral to the lower border of the spinous process of the 7 <sup>th</sup> cervical vertebra                                       |
| Wangu(GB-12)        | On the head, in the depression posterior and inferior to the mastoid process.                                                                        |
| Fengchi(GB-20)      | On the nape, below the occipital, on a level with Fengfu DU-16, in the depression between the upper portion of trapezius and the sternocleidomastoid |
| Tianzhu(BL-10)      | On the nape, 1.3 cun lateral to the posterior hairline, in the depression of                                                                         |



|    |                   |                                                                                                                                                                            |
|----|-------------------|----------------------------------------------------------------------------------------------------------------------------------------------------------------------------|
|    |                   | the posterior hairline lateral to the trapezius muscle                                                                                                                     |
| 1  |                   |                                                                                                                                                                            |
| 2  |                   |                                                                                                                                                                            |
| 3  |                   |                                                                                                                                                                            |
| 4  | Dazhui(DU-14)     | On the posterior median line, in the depression below the spinous process of the 7 <sup>th</sup> cervical vertebra                                                         |
| 5  |                   |                                                                                                                                                                            |
| 6  | Dazhu(BL-11)      | On the back, 1.5 cun lateral to the lower border of the spinous process of the 1 <sup>st</sup> thoracic vertebra                                                           |
| 7  |                   |                                                                                                                                                                            |
| 8  |                   |                                                                                                                                                                            |
| 9  | Jianwaishu(SI-14) | On the back, 3 cun lateral to the lower border of the spinous process of the first thoracic vertebra                                                                       |
| 10 |                   |                                                                                                                                                                            |
| 11 | Tianliao(SJ-15)   | On the region of scapula, at the midpoint of the line connecting Jianjing GB-21 with Quyuan SI-13, on the superior angle of the scapula                                    |
| 12 |                   |                                                                                                                                                                            |
| 13 | Jugu(LI-16)       | In the upper portion of the shoulder, in the depression between the acromial end of clavicle and the scapular spine                                                        |
| 14 |                   |                                                                                                                                                                            |
| 15 | Tianzong(SI-11)   | In the region of the scapula, in the depression of the center of the subscapular fossa, on a level with the 4 <sup>th</sup> thoracic vertebra                              |
| 16 |                   |                                                                                                                                                                            |
| 17 | Shousanli(LI-10)  | Flexing the elbow, on the dorsal radial side of the forearm, on the line connecting Yangxi LI-5 with Quchi LI-11, 2cun below the transverse cubital crease                 |
| 18 |                   |                                                                                                                                                                            |
| 19 | Lieque(LU-7)      | On the radial margin of the forearm, 1.5 cun above the transverse crease of the wrist, between the branchioradial muscle and the long abductor muscle tendon of thumb      |
| 20 |                   |                                                                                                                                                                            |
| 21 | Zhongzhu(SJ-3)    | On the dorsum of the hand, in the depression between the 4 <sup>th</sup> and 5 <sup>th</sup> metacarpal bones, proximal to the 4 <sup>th</sup> metacarpalangeal joint      |
| 22 |                   |                                                                                                                                                                            |
| 23 | Houxi(SI-3)       | On the ulna side of the palm, proximate to the fifth metacarpophalangeal joint, at the end of transverse crease of metacarpophalangeal joint, at the dorsoventral boundary |
| 24 |                   |                                                                                                                                                                            |
| 25 |                   |                                                                                                                                                                            |
| 26 |                   |                                                                                                                                                                            |
| 27 |                   |                                                                                                                                                                            |
| 28 |                   |                                                                                                                                                                            |
| 29 |                   |                                                                                                                                                                            |
| 30 |                   |                                                                                                                                                                            |
| 31 |                   |                                                                                                                                                                            |
| 32 |                   |                                                                                                                                                                            |
| 33 |                   |                                                                                                                                                                            |
| 34 |                   |                                                                                                                                                                            |

### Outcome measurements

All data collection for each patient will be completed on the same day.

### Body surface temperature

Thermal imaging technology has been widely applied to assess pain and muscle damage.[16 17] Each participant will be evaluated in a room with a constant temperature of 26°C. Investigators will use Fotric thermal imaging cameras (Fotric 226, IRS Systems Inc., Allen, TX, USA) to make measurements at each of the 29 acupoints in the five body regions. The temperature data of each point on the images will be analyzed using professional software (AnalyzeIR, IRS Systems Inc., Allen, TX, USA).

### Mechanical pain threshold

Investigators will use the electronic Von Frey esthesiometer (type 2390, IITC Life Science,

1  
2  
3  
4 Woodland Hills, CA, USA) to make two measurements of the mechanical pain threshold at each of  
5  
6 the 29 acupoints in the five body regions in turn. Previous studies have found that the device can  
7  
8 detect hyperalgesia and changes in sensory nerve function.[18-20] Mechanical pain caused by  
9  
10 punctate stimuli is related to A $\delta$ -fibers.[21] If there is a difference of more than 15 g between the  
11  
12 two measurements of mechanical pain threshold made at one acupoint, the mechanical pain  
13  
14 threshold at that acupoint will be measured a third time. Progressive pressure will be applied at a  
15  
16 rate of 10 g/s at each acupoint. The average mechanical pain threshold will be calculated for each  
17  
18 acupoint. To reduce the error associated with the effect of assessment at one point on the assessment  
19  
20 of adjacent points, a method of alternate assessment of acupoints on the left and right sides of the  
21  
22 body will be adopted.

### 23 24 25 **Pressure pain threshold**

26  
27 The pressure pain threshold (PPT) is widely used in clinical practice as a semi-objective method  
28  
29 with which to quantify localized pain.[22 23] Pain caused by blunt pressure stimuli is related to C-  
30  
31 fibers.[21] Investigators will use the FDIX Force Gauge (Force One™ FDIX, Wagner Instruments,  
32  
33 Greenwich, CT, USA) to make two measurements of the PPT at each of the 29 acupoints in the five  
34  
35 body regions in turn. If there is a difference of more than 500 gf between the two PPT measurements  
36  
37 performed at one acupoint, the PPT at that acupoint will be measured a third time. Progressive  
38  
39 pressure will be applied at a rate of 100 gf/s at each acupoint. The average PPT will be calculated  
40  
41 for each acupoint. A method of alternate assessment of the acupoints on the left and right sides of  
42  
43 the body will again be adopted.

### 44 45 46 **Skin resistance**

47  
48 Investigators will use the Acupoint dynamics research instrument (LMR30-RIII, Peking  
49  
50 University, Beijing, China) to record the skin resistance at nine acupoints (GB-21, GB-20, BL-11,  
51  
52 LI-10, SI-3; bilateral) and at the two most sensitive points (if there are two sensitive points).

### 53 54 55 56 **Pain**

57  
58 Neck pain will be measured using the Visual Analogue Scale, the Northwick Park Neck Pain  
59  
60 Questionnaire, and the McGill Pain Questionnaire. The Visual Analogue Scale will be used to

1  
2  
3  
4 measure the severity of pain. The Northwick Park Neck Pain Questionnaire provides a reliable  
5  
6 outcome measure for patients with neck pain, while the McGill Pain Questionnaire is used to  
7  
8 measure the different qualities of the subjective pain experience; these questionnaires have been  
9  
10 proven valid, and are convenient for patients to complete.[24 25]

### 11 12 13 **Neck function**

14  
15 The change in neck function will be evaluated by measuring the cervical range of motion before  
16  
17 and after treatment.

### 18 19 20 21 **General demographic information**

22  
23 This will include the collection of data regarding age, disease duration, medical history, and  
24  
25 medication type and dosage.

### 26 27 28 29 **Safety and adverse events**

30  
31 Non-invasive assessments of the body surface do not generally cause adverse events. However, we  
32  
33 will still record the number and type (e.g. serious pain, fainting) of adverse events in each group.  
34  
35 Participants who experience adverse events will receive the appropriate intervention. Adverse  
36  
37 events will be immediately reported to the primary investigator and the ethics committee, and the  
38  
39 affected participants will be withdrawn from the study.

### 40 41 42 43 **Sample size calculation**

44  
45 Sample size calculations for a matched case-control study design will be performed using PASS 11.  
46  
47 Few previous studies have evaluated acupoint sensitization, especially in healthy subjects. Our  
48  
49 previous small sample-sized study indicated that the rate of acupoint sensitization ranged from 20%  
50  
51 to 70%, and so we set this rate at 50% to calculate the minimum sample size required for the  
52  
53 proposed study. With a rate of healthy subjects of 20%, the odds ratio is 4. Thus, the smallest sample  
54  
55 size is 108 with two-sided confidence,  $\alpha=0.05$ ,  $\beta=0.01$ , and a ratio of control subjects to cases of 1.  
56  
57 Considering the potential non-response rate and sampling effectiveness, the final smallest sample  
58  
59 size is 224 patients, plus 224 age- and sex-matched healthy subjects.  
60

### Statistical analysis

Data will be blinded, double-entered in EpiData 3.1 software, and adequately checked for errors. SPSS 21.0 (SPSS Inc., Chicago, IL, USA) will then be used to complete the statistical analyses. The statistical data evaluation will be performed by the West China School of Public Health at Sichuan University, China. Missing data will be processed without imputation. First, the distribution of basic information in the case and control groups will be described, including age, sex, height, weight, job occupation, and education level. Data will be presented as means (SD) for continuous variables, and as frequency (percentage) for categorical variables. The distributions of sensitized points will be shown in scatter plots to represent the skin morphological changes. The distributions of the intensity of neck pain and neck function will also be described. Hypothetical testing will then be performed to assess the differences between the case and control groups in body surface sensations and biophysical properties, including body surface temperature, mechanical pain threshold, PPT, and skin resistance. Parametric statistical testing (t-test) will be used for data that are normally distributed; otherwise, non-parametric statistical testing (Wilcoxon's signed rank test) will be used. If there is a difference between the case and control groups in body surface temperature, mechanical pain threshold, PPT, or skin resistance, the cut-off values for these indexes to distinguish between sensitive and non-sensitive states (including heat-sensitivity, pain-sensitivity, and electrical-sensitivity) will be detected using receiver operating characteristic curve analyses. Finally, the acupoint sensitization rates of patients and healthy subjects will be calculated separately regarding the aspects of heat, pain, and electrical sensitivity to identify the most important form of sensitivity for all acupoints.

### Quality control

This is a multi-center observational study, and so quality control will play a vital role in the extrapolation of the conclusion. To ensure the integrity of the study and protect the rights and health of the participants, we will set up a Data and Safety Monitoring Board. The Data and Safety Monitoring Board will be developed in accordance with the Operational Guidelines for the Establishment and Functioning of the Data and Safety Monitoring Boards of the World Health Organization. Separate from the Data and Safety Monitoring Board, a quality control group will be established to guarantee the validity and reliability of results. Before study commencement, fieldwork operation manuals will be prepared, and pilot study participants from all centers will

1  
2  
3  
4 undergo training in accordance with the standard operating procedure of this study. Every 3 months,  
5  
6 members of the quality control group will conduct a quality control review at each study site, and  
7  
8 produce a report regarding the quality analysis of the whole data collection process.  
9

## 11 **DISCUSSION**

13 Neck pain is the third-most common chronic pain condition, and the fourth leading cause of  
14  
15 disability worldwide.[26] Acupuncture is a popular non-pharmacological modality used to relieve  
16  
17 pain. The analgesic properties of acupuncture may be mediated by the release of endogenous  
18  
19 opioids.[27]

21 The latest research has found that the performance of acupuncture at sensitive points may provide  
22  
23 the most effective treatment.[8 28] When the body is in a diseased state, there will be morphological  
24  
25 form-sensitive point changes, such as nodules, pimples, uplifting, dimpling, and changes in skin  
26  
27 color.[29] Thermal image detection has proved that the temperature of corresponding acupoints will  
28  
29 be obviously abnormal when a patient has visceral illness, such as diseases of the heart, lung, and  
30  
31 stomach, which indicates that the temperature of acupoints can reflect the physiological and  
32  
33 pathological phenomena of the affected organs.[30] Studies have confirmed that the PPT at  
34  
35 acupoints changes when patients are in a diseased state.[6 31 32] The degree of change in the PPT  
36  
37 may reflect the intensity of acupoint sensitization, and may be related to the disease status.[33] This  
38  
39 proposed observational study will bridge the knowledge gap regarding the optimal sensitization of  
40  
41 acupoints in various forms of point sensitivity in patients with neck pain.

42 As this will be the first study to evaluate the association between acupoint sensitization and neck  
43  
44 pain, this observational study may have some limitations. The main limitation is that in order to  
45  
46 reduce the bias caused by other factors and to ensure consistency, this study will only include  
47  
48 patients with simple neck pain, while excluding patients with other types of neck pain (such as  
49  
50 secondary neck pain). Furthermore, as the four participating centers are located in four different  
51  
52 regions in China, it may be difficult to implement quality control; thus, quality control reviews will  
53  
54 be conducted every 3 months.

56 In conclusion, this article describes the design and protocol of a study that aims to observe the  
57  
58 different types of sensitization (e.g. temperature, tenderness) and the distribution of sensitized  
59  
60 acupoints in patients with neck pain, to analyze the cutoff values for acupoint sensitization in

1  
2  
3  
4 patients with neck pain, and to identify the most prevalent sensitized forms of the sensitized points  
5  
6 in patients with neck pain. The results will provide a basis for the selection of clinically optimal  
7  
8 stimulation sites for the treatment of neck pain.  
9

### 11 **Acknowledgments**

12  
13 We thank the staff of Chengdu CTC Tianfu Digital Technology Inc. for providing images. We  
14  
15 acknowledge the help and contributions from the inspectors, acupuncturists, experts, and  
16  
17 investigators in each center. We thank Kelly Zammit, BVSc, from Liwen Bianji, Edanz Editing  
18  
19 China ([www.liwenbianji.cn/ac](http://www.liwenbianji.cn/ac)), for editing the English text of a draft of this manuscript.  
20  
21

### 23 **Authors' contributions**

24  
25 MSS, SYT, JRP, DJC, CXY, HZ, LZ, and FRL participated in the design of the trial, in creating the  
26  
27 data analysis plan, and in drafting the manuscript. GYG, XSM, MXY, and JC collected the  
28  
29 information needed for the performance of this trial in each center. All of the authors discussed,  
30  
31 read, and revised the manuscript, and gave final approval for the publication of this study protocol.  
32  
33

### 35 **Funding**

36  
37 This work was financially supported by the National Natural Science Foundation of China (no.  
38  
39 81590950, 81590951, 81722050).  
40  
41

### 43 **Competing interests**

44  
45 The authors declare that they have no competing interests.  
46  
47

### 48 **Ethics approval**

49  
50 The study protocol has been approved by the institutional review board and ethics committee of the  
51  
52 First Affiliated Hospital of Chengdu University of Traditional Chinese Medicine (May 2018).  
53  
54

### 56 **Provenance and peer review**

57  
58 Not commissioned; internally peer reviewed.  
59  
60

## Open Access

This is an Open Access article distributed in accordance with the Creative Commons Attribution Non Commercial (CCBY-NC 3.0) license, which permits others to distribute, remix, adapt, build upon this work noncommercially, and license their derivative works on different terms, provided the original work is properly cited and the use is non-commercial. See: <http://creativecommons.org/licenses/by-nc/3.0/>

## REFERENCES

1. Fejer R, Kyvik KO, Hartvigsen J. The prevalence of neck pain in the world population: a systematic critical review of the literature. *European spine journal : official publication of the European Spine Society, the European Spinal Deformity Society, and the European Section of the Cervical Spine Research Society* 2006;**15**(6):834-48 doi: 10.1007/s00586-004-0864-4[published Online First: Epub Date]].
2. Guidelines for grading diagnosis and treatment of cervical spondylosis in Anhui Province, China (安徽省颈椎病分级诊疗指南) . *Anhui Medical Journal* 2017;**38**(9)
3. White AR, Ernst E. A systematic review of randomized controlled trials of acupuncture for neck pain. *Rheumatology (Oxford, England)* 1999;**38**(2):143-7
4. Mejuto-Vazquez MJ, Salom-Moreno J, Ortega-Santiago R, et al. Short-term changes in neck pain, widespread pressure pain sensitivity, and cervical range of motion after the application of trigger point dry needling in patients with acute mechanical neck pain: a randomized clinical trial. *The Journal of orthopaedic and sports physical therapy* 2014;**44**(4):252-60 doi: 10.2519/jospt.2014.5108[published Online First: Epub Date]].
5. Irnich D, Behrens N, Gleditsch JM, et al. Immediate effects of dry needling and acupuncture at distant points in chronic neck pain: results of a randomized, double-blind, sham-controlled crossover trial. *Pain* 2002;**99**(1-2):83-9
6. Yan CQ, Zhang S, Li QQ, et al. Detection of peripheral and central sensitisation at acupoints in patients with unilateral shoulder pain in Beijing: a cross-sectional matched case-control study. *BMJ open* 2017;**7**(6):e014438
7. Luo YN, Zhou YM, Zhong X, et al. Observation of Pain-Sensitive Points in Patients with Knee Osteoarthritis: A Pilot Study. *European Journal of Integrative Medicine* 2018
8. Chen RX, Kang MF. Acupoint heat-sensitization and its clinical significance. *Journal of Traditional Chinese Medicine* 2006;**2001**(4):488-9
9. Yao ZL, Liu F, Song NC. 40 Cases of Neck Type of Cervical Spondylosis Treated by Acupotomy Based on the Theory of Trigger point(基于激痛点理论应用针刀治疗颈型颈椎病 40 例). *Zhongguo zhen jiu = Chinese acupuncture & moxibustion* 2016;**36**(11):1155-55
10. Zhang H, Xu N, Huang R, et al. Heat-Sensitive Moxibustion in Treatment of Cervical Spondylosis. *Liaoning Journal of Traditional Chinese Medicine* 2016(12):2631-34
11. Xiao L, Meng X, Du S, et al. Therapeutic Observation of Heavy-dose Moxibustion at Sha-petechiae for Neck-type Cervical Spondylosis Due to Cold Coagulation and Blood Stagnation. *Shanghai Journal of Acupuncture and Moxibustion* 2017(11):1336-39

12. von Elm E, Altman DG, Egger M, et al. Strengthening the Reporting of Observational Studies in Epidemiology (STROBE) statement: guidelines for reporting observational studies. *BMJ (Clinical research ed)* 2007;**335**(7624):806-8 doi: 10.1136/bmj.39335.541782.AD[published Online First: Epub Date]].
13. Croft PR, Lewis M, Papageorgiou AC, et al. Risk factors for neck pain: a longitudinal study in the general population. *Pain* 2001;**93**(3):317-25
14. Falla D, Lindstrøm R, Rechter L, et al. Effectiveness of an 8-week exercise programme on pain and specificity of neck muscle activity in patients with chronic neck pain: A randomized controlled study. *European Journal of Pain* 2013;**17**(10):1517-28
15. Cagnie B, Castelein B, Pollie F, et al. Evidence for the Use of Ischemic Compression and Dry Needling in the Management of Trigger Points of the Upper Trapezius in Patients with Neck Pain: A Systematic Review. *American journal of physical medicine & rehabilitation* 2015;**94**(7):573-83 doi: 10.1097/phm.000000000000266[published Online First: Epub Date]].
16. Ring EF, Ammer K. Infrared thermal imaging in medicine. *Physiological measurement* 2012;**33**(3):R33-46 doi: 10.1088/0967-3334/33/3/r33[published Online First: Epub Date]].
17. Adamczyk JG, Krasowska I, Boguszewski D, et al. The use of thermal imaging to assess the effectiveness of ice massage and cold-water immersion as methods for supporting post-exercise recovery. *Journal of thermal biology* 2016;**60**:20-5 doi: 10.1016/j.jtherbio.2016.05.006[published Online First: Epub Date]].
18. Neto MLP, Maciel LYS, Cruz KML, et al. Does electrode placement influence tens-induced antihyperalgesia in experimental inflammatory pain model? *Brazilian journal of physical therapy* 2017;**21**(2):92-99 doi: 10.1016/j.bjpt.2017.03.003[published Online First: Epub Date]].
19. Yamamoto S, Ono H, Kume K, et al. Oxaliplatin treatment changes the function of sensory nerves in rats. *Journal of pharmacological sciences* 2016;**130**(4):189-93 doi: 10.1016/j.jphs.2015.12.004[published Online First: Epub Date]].
20. Chen Y, Yao Y, Wu Y, et al. Transcutaneous electric acupoint stimulation alleviates remifentanyl-induced hyperalgesia in patients undergoing thyroidectomy: a randomized controlled trial. *International journal of clinical and experimental medicine* 2015;**8**(4):5781-7
21. Beissner F, Brandau A, Henke C, et al. Quick discrimination of A(delta) and C fiber mediated pain based on three verbal descriptors. *PloS one* 2010;**5**(9):e12944 doi: 10.1371/journal.pone.0012944[published Online First: Epub Date]].
22. Persson AL, Brogårdh C, Sjölund BH. Tender or not tender: test-retest repeatability of pressure pain thresholds in the trapezius and deltoid muscles of healthy women. *Journal of rehabilitation medicine* 2004;**36**(1):17
23. Fischer AA. Pressure algometry over normal muscles. Standard values, validity and reproducibility of pressure threshold. *Pain* 1987;**30**(1):115-26
24. Chiu TT, Lam TH, Hedley AJ. Subjective health measure used on Chinese patients with neck pain in Hong Kong. *Spine* 2001;**26**(17):1884-9
25. Burckhardt CS, Jones KD. Adult measures of pain: The McGill Pain Questionnaire (MPQ), Rheumatoid Arthritis Pain Scale (RAPS), Short - Form McGill Pain Questionnaire (SF - MPQ), Verbal Descriptive Scale (VDS), Visual Analog Scale (VAS), and West Haven - Yale Multidisciplinary Pain. *Arthritis Care & Research* 2010;**49**(S5):0-0
26. Hoy D, March L, Woolf A, et al. The global burden of neck pain: estimates from the global burden of disease 2010 study. *Annals of the rheumatic diseases* 2014;**73**(6):968



- 1  
2  
3 27. Andersson S, Lundeberg T. Acupuncture--from empiricism to science: functional background to  
4 acupuncture effects in pain and disease. *Medical hypotheses* 1995;**45**(3):271-81  
5  
6 28. Zhang S, Wang W, Zou L, et al. [Acupoints heat-sensitive moxibustion in the application of traditional  
7 Chinese surgery]. *Zhongguo zhen jiu = Chinese acupuncture & moxibustion* 2016;**36**(1):109-12  
8  
9 29. Zhou S, Yin H, Huai M. Progress and Prospect of the Study on the Correlation Mechanism of Surface  
10 and Visceral Phase. *Acupuncture Research* 1982(02)  
11  
12 30. Shui YL, Institute QH, Pasadena. Infrared imaging system as a versatile diagnostic and auxiliary  
13 treatment tool in Chinese Medicine.  
14  
15 31. Chen S, Miao Y, Nan Y, et al. The Study of Dynamic Characteristic of Acupoints Based on the Primary  
16 Dysmenorrhea Patients with the Tenderness Reflection on Dijii (SP 8). *Evidence-Based  
17 Complementray and Alternative Medicine*,2015,(2015-6-16) 2015;**2015**:158012  
18  
19 32. Chae Y, Kim HY, Lee HJ, et al. The alteration of pain sensitivity at disease-specific acupuncture points  
20 in premenstrual syndrome. *Journal of Physiological Sciences* 2007;**57**(2):115-19  
21  
22 33. Tunks E, Crook J, Norman G, et al. Tender points in fibromyalgia. *Pain* 1988;**34**(1):11  
23  
24  
25  
26  
27  
28  
29  
30  
31  
32  
33  
34  
35  
36  
37  
38  
39  
40  
41  
42  
43  
44  
45  
46  
47  
48  
49  
50  
51  
52  
53  
54  
55  
56  
57  
58  
59  
60

**Figure 1** Flowchart of the study design.

**Figure 2** The test regions and acupoints that will be used in the study.

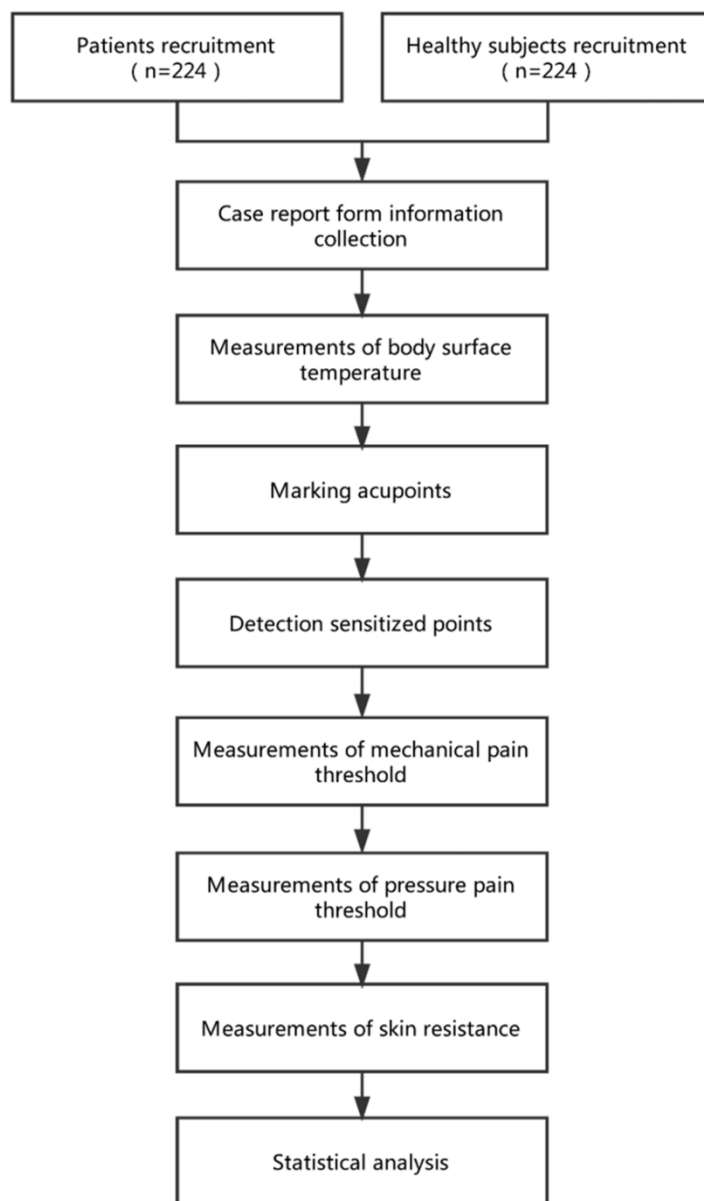

45 Flowchart of the study design.

46 53x89mm (600 x 600 DPI)

1  
2  
3  
4  
5  
6  
7  
8  
9  
10  
11  
12  
13  
14  
15  
16  
17  
18  
19  
20  
21  
22  
23  
24  
25  
26  
27  
28  
29  
30  
31  
32  
33  
34  
35  
36  
37  
38  
39  
40  
41  
42  
43  
44  
45  
46  
47  
48  
49  
50  
51  
52  
53  
54  
55  
56  
57  
58  
59  
60

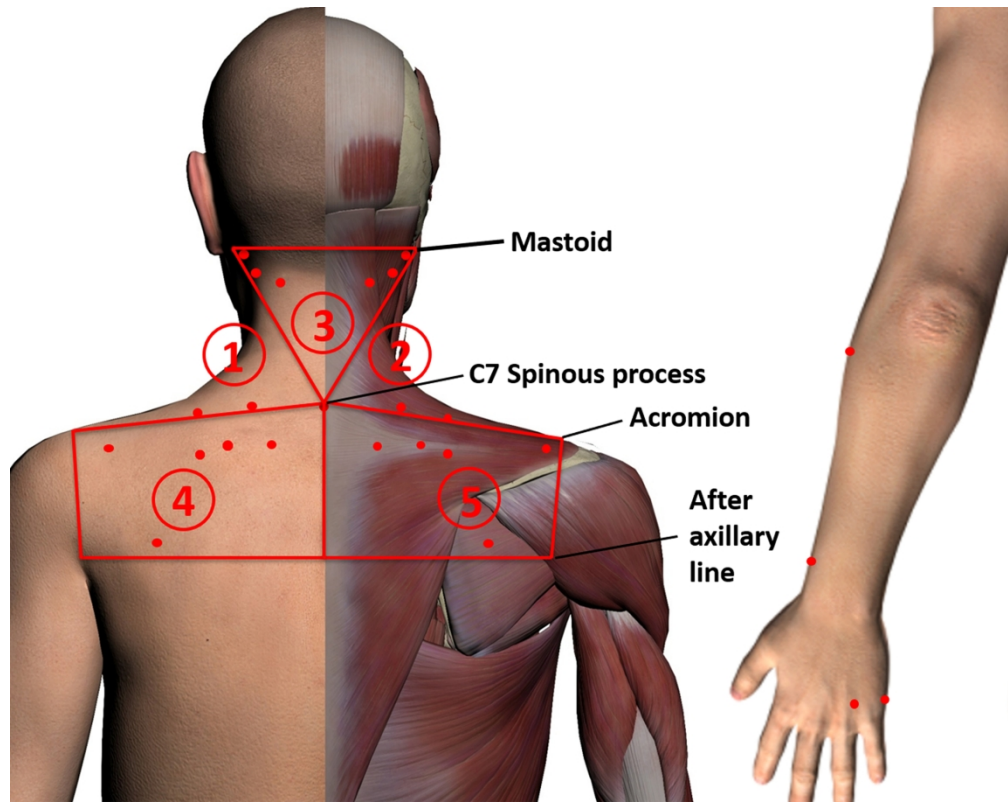

The test regions and acupoints that will be used in the study.

90x71mm (600 x 600 DPI)

## STROBE Statement—checklist of items that should be included in reports of observational studies

|                           | Item No. | Recommendation                                                                                      | Page No. | Relevant text from manuscript                                                                                                                                                                                                                                                                                                                                                                                                                             |
|---------------------------|----------|-----------------------------------------------------------------------------------------------------|----------|-----------------------------------------------------------------------------------------------------------------------------------------------------------------------------------------------------------------------------------------------------------------------------------------------------------------------------------------------------------------------------------------------------------------------------------------------------------|
| <b>Title and abstract</b> | 1        | (a) Indicate the study's design with a commonly used term in the title or the abstract              | 1        | a cross-sectional, matched, case-control study                                                                                                                                                                                                                                                                                                                                                                                                            |
|                           |          | (b) Provide in the abstract an informative and balanced summary of what was done and what was found | 2        | The present study aims to identify the types of sensitization (e.g. temperature, tenderness) and distribution of sensitized points in patients with neck pain, to analyze the cutoff values and sensitization rate for acupoint sensitization in patients with neck pain, and to summarize the dominant forms of optimal sensitized points in patients with neck pain. This information will aid in the choice of optimal treatment points for neck pain. |
| <b>Introduction</b>       |          |                                                                                                     |          |                                                                                                                                                                                                                                                                                                                                                                                                                                                           |
| Background/rationale      | 2        | Explain the scientific background and rationale for the investigation being reported                | 3,4      | Recent Chinese research has found that acupoints can be sensitized, with associated changes in function and size, and thus can functionally switch from a relatively 'silent' state to a relatively 'active' state. Treatment of an acupoint while it is in the 'active' state is thought to achieve a better clinical outcome, and this has become a focus in acupoint research. Recent clinical                                                         |

1  
2  
3  
4  
5  
6  
7  
8  
9  
10  
11  
12  
13  
14  
15  
16  
17  
18  
19  
20  
21  
22  
23  
24  
25  
26  
27  
28  
29  
30  
31  
32  
33  
34  
35  
36  
37  
38  
39  
40  
41  
42  
43  
44  
45  
46

For peer review only

studies report that a superior outcome is obtained using acupuncture at pain-sensitive points, and moxibustion at heat-sensitive points or visual-sensitive points. However, most of the current observational studies have only focused on one form of sensitization in a small sample population, and thus are not comprehensive studies of various forms of sensitization. The choice of optimal treatment points for neck pain in clinical practice is still controversial.

Objectives

3

State specific objectives, including any prespecified hypotheses

4

We describe the protocol for an observational study that aims to identify the different types of sensitization (e.g. temperature, tenderness) and the distribution of sensitized acupoints in patients with neck pain, to analyze the cutoff values for acupoint sensitization in patients with neck pain, and to determine the most prevalent sensitization types seen at sensitized points in patients with neck pain. Previous small sample studies have confirmed the feasibility of sensitization testing. The present study will provide a basis for the selection of the

optimal treatment points for neck pain in clinical practice.

---

## Methods

|              |   |                                                                                                                                 |     |                                                                                                                                                                                                                                                                                                                                                                                                                                                                                                                                                                                                                           |
|--------------|---|---------------------------------------------------------------------------------------------------------------------------------|-----|---------------------------------------------------------------------------------------------------------------------------------------------------------------------------------------------------------------------------------------------------------------------------------------------------------------------------------------------------------------------------------------------------------------------------------------------------------------------------------------------------------------------------------------------------------------------------------------------------------------------------|
| Study design | 4 | Present key elements of study design early in the paper                                                                         | 4   | This is a cross-sectional, age- and sex-matched, case-control study. The protocol was developed in accordance with the Consolidated Standards of Reporting Trials guidelines and the Strengthening the Reporting of Observational Studies in Epidemiology guidelines.                                                                                                                                                                                                                                                                                                                                                     |
| Setting      | 5 | Describe the setting, locations, and relevant dates, including periods of recruitment, exposure, follow-up, and data collection | 5,6 | We will recruit patients from the outpatient departments of Acupuncture and Moxibustion, and Orthopedics in five clinical centers in China: Chengdu University of Traditional Chinese Medicine, Hunan University of Traditional Chinese Medicine, Shaanxi University of Traditional Chinese Medicine, Shanxi University of Traditional Chinese Medicine, and Guiyang College of Traditional Chinese Medicine. Healthy subjects without neck or shoulder pain will comprise age- and sex-matched residents from the same communities as the patients. Recruitment strategies will include posting advertisements on social |

|    |              |   |                                                                                                             |                                   |
|----|--------------|---|-------------------------------------------------------------------------------------------------------------|-----------------------------------|
| 1  |              |   |                                                                                                             |                                   |
| 2  |              |   |                                                                                                             | media (such as WeChat, which is   |
| 3  |              |   |                                                                                                             | similar to Facebook) and at       |
| 4  |              |   |                                                                                                             | community centers, or by word-of- |
| 5  |              |   |                                                                                                             | mouth introductions through       |
| 6  |              |   |                                                                                                             | subjects already enrolled in the  |
| 7  |              |   |                                                                                                             | study.                            |
| 8  |              |   |                                                                                                             |                                   |
| 9  |              |   |                                                                                                             |                                   |
| 10 | Participants | 6 | (a) <i>Cohort study</i> —Give the eligibility criteria, and the sources and methods of selection of         | 4, 5, 9, 10                       |
| 11 |              |   | participants. Describe methods of follow-up                                                                 |                                   |
| 12 |              |   | <i>Case-control study</i> —Give the eligibility criteria, and the sources and methods of case ascertainment |                                   |
| 13 |              |   | and control selection. Give the rationale for the choice of cases and controls                              |                                   |
| 14 |              |   | <i>Cross-sectional study</i> —Give the eligibility criteria, and the sources and methods of selection of    |                                   |
| 15 |              |   | participants                                                                                                |                                   |
| 16 |              |   |                                                                                                             |                                   |
| 17 |              |   |                                                                                                             |                                   |
| 18 |              |   |                                                                                                             |                                   |
| 19 |              |   |                                                                                                             |                                   |
| 20 |              |   |                                                                                                             |                                   |
| 21 |              |   |                                                                                                             |                                   |
| 22 |              |   |                                                                                                             |                                   |
| 23 |              |   |                                                                                                             |                                   |
| 24 |              |   |                                                                                                             |                                   |
| 25 |              |   | (b) <i>Cohort study</i> —For matched studies, give matching criteria and number of exposed and              | 5, 9, 10                          |
| 26 |              |   | unexposed                                                                                                   |                                   |
| 27 |              |   | <i>Case-control study</i> —For matched studies, give matching criteria and the number of controls per case  |                                   |
| 28 |              |   |                                                                                                             |                                   |
| 29 |              |   |                                                                                                             |                                   |
| 30 |              |   |                                                                                                             |                                   |
| 31 |              |   |                                                                                                             |                                   |
| 32 |              |   |                                                                                                             |                                   |
| 33 |              |   |                                                                                                             |                                   |
| 34 |              |   |                                                                                                             |                                   |
| 35 |              |   |                                                                                                             |                                   |
| 36 |              |   |                                                                                                             |                                   |
| 37 |              |   |                                                                                                             |                                   |
| 38 |              |   |                                                                                                             |                                   |
| 39 |              |   |                                                                                                             |                                   |
| 40 |              |   |                                                                                                             |                                   |
| 41 |              |   |                                                                                                             |                                   |
| 42 |              |   |                                                                                                             |                                   |
| 43 |              |   |                                                                                                             |                                   |
| 44 |              |   |                                                                                                             |                                   |
| 45 |              |   |                                                                                                             |                                   |
| 46 |              |   |                                                                                                             |                                   |

|                                                                                                                                                                                                         |                              |    |                                                                                                                                                                                      |     |                                                                                                                                                                                                                                                                                                                                                                                                                                                                                                                                                                                                                                                                                                                                                                                                                                                    |
|---------------------------------------------------------------------------------------------------------------------------------------------------------------------------------------------------------|------------------------------|----|--------------------------------------------------------------------------------------------------------------------------------------------------------------------------------------|-----|----------------------------------------------------------------------------------------------------------------------------------------------------------------------------------------------------------------------------------------------------------------------------------------------------------------------------------------------------------------------------------------------------------------------------------------------------------------------------------------------------------------------------------------------------------------------------------------------------------------------------------------------------------------------------------------------------------------------------------------------------------------------------------------------------------------------------------------------------|
| 1<br>2<br>3<br>4<br>5<br>6<br>7<br>8                                                                                                                                                                    | Variables                    | 7  | Clearly define all outcomes, exposures, predictors, potential confounders, and effect modifiers. Give diagnostic criteria, if applicable                                             | 7-9 | Body surface temperature, Mechanical pain threshold, Pressure pain threshold, Skin resistance, Pain, Neck function, General demographic information, Safety and adverse events.                                                                                                                                                                                                                                                                                                                                                                                                                                                                                                                                                                                                                                                                    |
| 9<br>10<br>11<br>12<br>13<br>14<br>15<br>16<br>17<br>18<br>19<br>20<br>21<br>22<br>23<br>24<br>25<br>26<br>27<br>28<br>29<br>30<br>31<br>32<br>33<br>34<br>35<br>36<br>37<br>38<br>39<br>40<br>41<br>42 | Data sources/<br>measurement | 8* | For each variable of interest, give sources of data and details of methods of assessment (measurement). Describe comparability of assessment methods if there is more than one group | 7-9 | Body surface temperature: Each participant will be evaluated in a room with a constant temperature of 26°C. Investigators will use Fotric thermal imaging cameras (Fotric 226, IRS Systems Inc., Allen, TX, USA) to make measurements at each of the 29 acupoints in the five body regions. The temperature data of each point on the images will be analyzed using professional software (AnalyzeIR, IRS Systems Inc., Allen, TX, USA).<br>Mechanical pain threshold: Investigators will use the electronic Von Frey esthesiometer (type 2390, IITC Life Science, Woodland Hills, CA, USA) to make two measurements of the mechanical pain threshold at each of the 29 acupoints in the five body regions in turn. If there is a difference of more than 15 g between the two measurements of mechanical pain threshold made at one acupoint, the |

1  
2  
3  
4  
5  
6  
7  
8  
9  
10  
11  
12  
13  
14  
15  
16  
17  
18  
19  
20  
21  
22  
23  
24  
25  
26  
27  
28  
29  
30  
31  
32  
33  
34  
35  
36  
37  
38  
39  
40  
41  
42  
43  
44  
45  
46



1  
2  
3  
4  
5  
6  
7  
8  
9  
10  
11  
12  
13  
14  
15  
16  
17  
18  
19  
20  
21  
22  
23  
24  
25  
26  
27  
28  
29  
30  
31  
32  
33  
34  
35  
36  
37  
38  
39  
40  
41  
42

---

mechanical pain threshold at that acupoint will be measured a third time. Progressive pressure will be applied at a rate of 10 g/s at each acupoint. The average mechanical pain threshold will be calculated for each acupoint. To reduce the error associated with the effect of assessment at one point on the assessment of adjacent points, a method of alternate assessment of acupoints on the left and right sides of the body will be adopted.

Pressure pain threshold:

Investigators will use the FDIX Force Gauge (Force One™ FDIX, Wagner Instruments, Greenwich, CT, USA) to make two measurements of the PPT at each of the 29 acupoints in the five body regions in turn. If there is a difference of more than 500 gf between the two PPT measurements performed at one acupoint, the PPT at that acupoint will be measured a third time. Progressive pressure will be applied at a rate of 100 gf/s at each acupoint. The average PPT will be calculated for each acupoint. A method of alternate assessment of the acupoints on the left and right

sides of the body will again be adopted.

Skin resistance: Investigators will use the Acupoint dynamics research instrument (LMR30-RIII, Peking University, Beijing, China) to record the skin resistance at nine acupoints (GB-21, GB-20, BL-11, LI-10, SI-3; bilateral) and at the two most sensitive points (if there are two sensitive points).

Pain: Neck pain will be measured using the Visual Analogue Scale, the Northwick Park Neck Pain Questionnaire, and the McGill Pain Questionnaire. The Visual Analogue Scale will be used to measure the severity of pain. The Northwick Park Neck Pain Questionnaire provides a reliable outcome measure for patients with neck pain, while the McGill Pain Questionnaire is used to measure the different qualities of the subjective pain experience; these questionnaires have been proven valid, and are convenient for patients to complete.

Neck function: The change in neck function will be evaluated by measuring the cervical range of motion before and after treatment.

For peer review only

1  
2  
3  
4  
5  
6  
7  
8  
9  
10  
11  
12  
13  
14  
15  
16  
17  
18  
19  
20  
21  
22  
23  
24  
25  
26  
27  
28  
29  
30  
31  
32  
33  
34  
35  
36  
37  
38  
39  
40  
41  
42  
43  
44  
45  
46

For peer review only

General demographic information  
This will include the collection of data regarding age, disease duration, medical history, and medication type and dosage.  
Safety and adverse events: Non-invasive assessments of the body surface do not generally cause adverse events. However, we will still record the number and type (e.g. serious pain, fainting) of adverse events in each group. Participants who experience adverse events will receive the appropriate intervention. Adverse events will be immediately reported to the primary investigator and the ethics committee, and the affected participants will be withdrawn from the study.

Bias 9 Describe any efforts to address potential sources of bias

6, 10, 11

All investigators will attend training to make sure all practices are standardized. And the investigator was not told whether the subject was a patient or a healthy controls.  
Data will be blinded, double-entered in EpiData 3.1 software, and adequately checked for errors. To ensure the integrity of the study and protect the rights and health of the participants, we will set up a

|    |              |    |                                                                                                |    |                                               |
|----|--------------|----|------------------------------------------------------------------------------------------------|----|-----------------------------------------------|
| 1  |              |    |                                                                                                |    |                                               |
| 2  |              |    |                                                                                                |    | Data and Safety Monitoring Board.             |
| 3  |              |    |                                                                                                |    | Every 3 months, members of the                |
| 4  |              |    |                                                                                                |    | quality control group will conduct a          |
| 5  |              |    |                                                                                                |    | quality control review at each study          |
| 6  |              |    |                                                                                                |    | site, and produce a report regarding          |
| 7  |              |    |                                                                                                |    | the quality analysis of the whole             |
| 8  |              |    |                                                                                                |    | data collection process.                      |
| 9  |              |    |                                                                                                |    |                                               |
| 10 |              |    |                                                                                                |    |                                               |
| 11 | Study size   | 10 | Explain how the study size was arrived at                                                      | 9  | Sample size calculations for a                |
| 12 |              |    |                                                                                                |    | matched case-control study design             |
| 13 |              |    |                                                                                                |    | will be performed using PASS 11.              |
| 14 |              |    |                                                                                                |    | Few previous studies have                     |
| 15 |              |    |                                                                                                |    | evaluated acupoint sensitization,             |
| 16 |              |    |                                                                                                |    | especially in healthy subjects. Our           |
| 17 |              |    |                                                                                                |    | previous small sample-sized study             |
| 18 |              |    |                                                                                                |    | indicated that the rate of acupoint           |
| 19 |              |    |                                                                                                |    | sensitization ranged from 20% to              |
| 20 |              |    |                                                                                                |    | 70%, and so we set this rate at 50%           |
| 21 |              |    |                                                                                                |    | to calculate the minimum sample               |
| 22 |              |    |                                                                                                |    | size required for the proposed                |
| 23 |              |    |                                                                                                |    | study. With a rate of healthy                 |
| 24 |              |    |                                                                                                |    | subjects of 20%, the odds ratio is 4.         |
| 25 |              |    |                                                                                                |    | Thus, the smallest sample size is             |
| 26 |              |    |                                                                                                |    | 108 with two-sided confidence,                |
| 27 |              |    |                                                                                                |    | $\alpha=0.05$ , $\beta=0.01$ , and a ratio of |
| 28 |              |    |                                                                                                |    | control subjects to cases of 1.               |
| 29 |              |    |                                                                                                |    | Considering the potential non-                |
| 30 |              |    |                                                                                                |    | response rate and sampling                    |
| 31 |              |    |                                                                                                |    | effectiveness, the final smallest             |
| 32 |              |    |                                                                                                |    | sample size is 224 patients, plus             |
| 33 |              |    |                                                                                                |    | 224 age- and sex-matched healthy              |
| 34 |              |    |                                                                                                |    | subjects.                                     |
| 35 |              |    |                                                                                                |    |                                               |
| 36 |              |    |                                                                                                |    |                                               |
| 37 |              |    |                                                                                                |    |                                               |
| 38 |              |    |                                                                                                |    |                                               |
| 39 |              |    |                                                                                                |    |                                               |
| 40 |              |    |                                                                                                |    |                                               |
| 41 | Quantitative | 11 | Explain how quantitative variables were handled in the analyses. If applicable, describe which | 10 | Parametric statistical testing (t-test)       |
| 42 |              |    |                                                                                                |    |                                               |
| 43 |              |    |                                                                                                |    |                                               |
| 44 |              |    |                                                                                                |    |                                               |
| 45 |              |    |                                                                                                |    |                                               |
| 46 |              |    |                                                                                                |    |                                               |

1  
2  
3  
4  
5  
6  
7  
8  
9  
10  
11  
12  
13  
14  
15  
16  
17  
18  
19  
20  
21  
22  
23  
24  
25  
26  
27  
28  
29  
30  
31  
32  
33  
34  
35  
36  
37  
38  
39  
40  
41  
42  
43  
44  
45  
46

|                     |    |                                                                                       |    |                                                                                                                                                                                                                                                                                                                                                                                                                                                                                                                                                                                                                                                                                                                                                                                                                                                                                                                   |
|---------------------|----|---------------------------------------------------------------------------------------|----|-------------------------------------------------------------------------------------------------------------------------------------------------------------------------------------------------------------------------------------------------------------------------------------------------------------------------------------------------------------------------------------------------------------------------------------------------------------------------------------------------------------------------------------------------------------------------------------------------------------------------------------------------------------------------------------------------------------------------------------------------------------------------------------------------------------------------------------------------------------------------------------------------------------------|
| variables           |    | groupings were chosen and why                                                         |    | will be used for data that are normally distributed; otherwise, non-parametric statistical testing (Wilcoxon’s signed rank test) will be used.                                                                                                                                                                                                                                                                                                                                                                                                                                                                                                                                                                                                                                                                                                                                                                    |
| Statistical methods | 12 | (a) Describe all statistical methods, including those used to control for confounding | 10 | First, the distribution of basic information in the case and control groups will be described, including age, sex, height, weight, job occupation, and education level. Data will be presented as means (SD) for continuous variables, and as frequency (percentage) for categorical variables. The distributions of sensitized points will be shown in scatter plots to represent the skin morphological changes. The distributions of the intensity of neck pain and neck function will also be described. Hypothetical testing will then be performed to assess the differences between the case and control groups in body surface sensations and biophysical properties, including body surface temperature, mechanical pain threshold, PPT, and skin resistance. Parametric statistical testing (t-test) will be used for data that are normally distributed; otherwise, non-parametric statistical testing |

For peer review only

(Wilcoxon's signed rank test) will be used. If there is a difference between the case and control groups in body surface temperature, mechanical pain threshold, PPT, or skin resistance, the cut-off values for these indexes to distinguish between sensitive and non-sensitive states (including heat-sensitivity, pain-sensitivity, and electrical-sensitivity) will be detected using receiver operating characteristic curve analyses. Finally, the acupoint sensitization rates of patients and healthy subjects will be calculated separately regarding the aspects of heat, pain, and electrical sensitivity to identify the most important form of sensitivity for all acupoints.

|  |  |                                                                                                                                                                                                                                                                                                           |     |                                                                                                                                        |
|--|--|-----------------------------------------------------------------------------------------------------------------------------------------------------------------------------------------------------------------------------------------------------------------------------------------------------------|-----|----------------------------------------------------------------------------------------------------------------------------------------|
|  |  | (b) Describe any methods used to examine subgroups and interactions                                                                                                                                                                                                                                       | N/A |                                                                                                                                        |
|  |  | (c) Explain how missing data were addressed                                                                                                                                                                                                                                                               | 10  | Missing data will be processed without imputation.                                                                                     |
|  |  | (d) <i>Cohort study</i> —If applicable, explain how loss to follow-up was addressed<br><i>Case-control study</i> —If applicable, explain how matching of cases and controls was addressed<br><i>Cross-sectional study</i> —If applicable, describe analytical methods taking account of sampling strategy | 5,6 | Healthy subjects without neck or shoulder pain will comprise age- and sex-matched residents from the same communities as the patients. |
|  |  | (e) Describe any sensitivity analyses                                                                                                                                                                                                                                                                     | N/A |                                                                                                                                        |

## Results

|              |     |                                                                                                                                                                                                   |     |
|--------------|-----|---------------------------------------------------------------------------------------------------------------------------------------------------------------------------------------------------|-----|
| Participants | 13* | (a) Report numbers of individuals at each stage of study—eg numbers potentially eligible, examined for eligibility, confirmed eligible, included in the study, completing follow-up, and analysed | N/A |
|--------------|-----|---------------------------------------------------------------------------------------------------------------------------------------------------------------------------------------------------|-----|

|                   |     |                                                                                                                                                                                                              |        |                                                                                                                                                                                                                                                                                                                                                                                                                |
|-------------------|-----|--------------------------------------------------------------------------------------------------------------------------------------------------------------------------------------------------------------|--------|----------------------------------------------------------------------------------------------------------------------------------------------------------------------------------------------------------------------------------------------------------------------------------------------------------------------------------------------------------------------------------------------------------------|
|                   |     | (b) Give reasons for non-participation at each stage                                                                                                                                                         | N/A    |                                                                                                                                                                                                                                                                                                                                                                                                                |
|                   |     | (c) Consider use of a flow diagram                                                                                                                                                                           | N/A    |                                                                                                                                                                                                                                                                                                                                                                                                                |
| Descriptive data  | 14* | (a) Give characteristics of study participants (eg demographic, clinical, social) and information on exposures and potential confounders                                                                     | N/A    |                                                                                                                                                                                                                                                                                                                                                                                                                |
|                   |     | (b) Indicate number of participants with missing data for each variable of interest                                                                                                                          | N/A    |                                                                                                                                                                                                                                                                                                                                                                                                                |
|                   |     | (c) <i>Cohort study</i> —Summarise follow-up time (eg, average and total amount)                                                                                                                             | N/A    |                                                                                                                                                                                                                                                                                                                                                                                                                |
| Outcome data      | 15* | <i>Cohort study</i> —Report numbers of outcome events or summary measures over time                                                                                                                          | N/A    |                                                                                                                                                                                                                                                                                                                                                                                                                |
|                   |     | <i>Case-control study</i> —Report numbers in each exposure category, or summary measures of exposure                                                                                                         | N/A    |                                                                                                                                                                                                                                                                                                                                                                                                                |
|                   |     | <i>Cross-sectional study</i> —Report numbers of outcome events or summary measures                                                                                                                           | N/A    |                                                                                                                                                                                                                                                                                                                                                                                                                |
| Main results      | 16  | (a) Give unadjusted estimates and, if applicable, confounder-adjusted estimates and their precision (eg, 95% confidence interval). Make clear which confounders were adjusted for and why they were included | N/A    |                                                                                                                                                                                                                                                                                                                                                                                                                |
|                   |     | (b) Report category boundaries when continuous variables were categorized                                                                                                                                    | N/A    |                                                                                                                                                                                                                                                                                                                                                                                                                |
|                   |     | (c) If relevant, consider translating estimates of relative risk into absolute risk for a meaningful time period                                                                                             | N/A    |                                                                                                                                                                                                                                                                                                                                                                                                                |
| Other analyses    | 17  | Report other analyses done—eg analyses of subgroups and interactions, and sensitivity analyses                                                                                                               | N/A    |                                                                                                                                                                                                                                                                                                                                                                                                                |
| <b>Discussion</b> |     |                                                                                                                                                                                                              |        |                                                                                                                                                                                                                                                                                                                                                                                                                |
| Key results       | 18  | Summarise key results with reference to study objectives                                                                                                                                                     | N/A    |                                                                                                                                                                                                                                                                                                                                                                                                                |
| Limitations       | 19  | Discuss limitations of the study, taking into account sources of potential bias or imprecision. Discuss both direction and magnitude of any potential bias                                                   | 11, 12 | The main limitation is that in order to reduce the bias caused by other factors and to ensure consistency, this study will only include patients with simple neck pain, while excluding patients with other types of neck pain (such as secondary neck pain). Furthermore, as the four participating centers are located in four different regions in China, it may be difficult to implement quality control. |
| Interpretation    | 20  | Give a cautious overall interpretation of results considering objectives, limitations, multiplicity of                                                                                                       | N/A    |                                                                                                                                                                                                                                                                                                                                                                                                                |

|                          |    |                                                                                                                                                               |    |                                                                                                                                                                                                                                                                                                                                             |
|--------------------------|----|---------------------------------------------------------------------------------------------------------------------------------------------------------------|----|---------------------------------------------------------------------------------------------------------------------------------------------------------------------------------------------------------------------------------------------------------------------------------------------------------------------------------------------|
|                          |    | analyses, results from similar studies, and other relevant evidence                                                                                           |    |                                                                                                                                                                                                                                                                                                                                             |
| Generalisability         | 21 | Discuss the generalisability (external validity) of the study results                                                                                         | 3  | As this is the first study of its kind, only patients with simple neck pain were included; patients with other types of neck pain, such as secondary neck pain, were excluded to reduce the bias caused by other factors and ensure consistency. However, this will limit the representativeness and generalizability of the study results. |
| <b>Other information</b> |    |                                                                                                                                                               |    |                                                                                                                                                                                                                                                                                                                                             |
| Funding                  | 22 | Give the source of funding and the role of the funders for the present study and, if applicable, for the original study on which the present article is based | 12 | This work was financially supported by the National Natural Science Foundation of China (no. 81590950, 81590951, 81722050).                                                                                                                                                                                                                 |

\*Give information separately for cases and controls in case-control studies and, if applicable, for exposed and unexposed groups in cohort and cross-sectional studies.

**Note:** An Explanation and Elaboration article discusses each checklist item and gives methodological background and published examples of transparent reporting. The STROBE checklist is best used in conjunction with this article (freely available on the Web sites of PLoS Medicine at <http://www.plosmedicine.org/>, Annals of Internal Medicine at <http://www.annals.org/>, and Epidemiology at <http://www.epidem.com/>). Information on the STROBE Initiative is available at [www.strobe-statement.org](http://www.strobe-statement.org).



# BMJ Open

## Identification of the optimal points for the acupuncture treatment of neck pain in China: protocol for a multicenter, matched, case-control study

|                                 |                                                                                                                                                                                                                                                                                                                                                                                                                                                                                                                                                                                                                                                                                                                                                                                                                                                                                                                                                                                                                                                                                                                                   |
|---------------------------------|-----------------------------------------------------------------------------------------------------------------------------------------------------------------------------------------------------------------------------------------------------------------------------------------------------------------------------------------------------------------------------------------------------------------------------------------------------------------------------------------------------------------------------------------------------------------------------------------------------------------------------------------------------------------------------------------------------------------------------------------------------------------------------------------------------------------------------------------------------------------------------------------------------------------------------------------------------------------------------------------------------------------------------------------------------------------------------------------------------------------------------------|
| Journal:                        | <i>BMJ Open</i>                                                                                                                                                                                                                                                                                                                                                                                                                                                                                                                                                                                                                                                                                                                                                                                                                                                                                                                                                                                                                                                                                                                   |
| Manuscript ID                   | bmjopen-2019-029194.R1                                                                                                                                                                                                                                                                                                                                                                                                                                                                                                                                                                                                                                                                                                                                                                                                                                                                                                                                                                                                                                                                                                            |
| Article Type:                   | Protocol                                                                                                                                                                                                                                                                                                                                                                                                                                                                                                                                                                                                                                                                                                                                                                                                                                                                                                                                                                                                                                                                                                                          |
| Date Submitted by the Author:   | 28-Mar-2019                                                                                                                                                                                                                                                                                                                                                                                                                                                                                                                                                                                                                                                                                                                                                                                                                                                                                                                                                                                                                                                                                                                       |
| Complete List of Authors:       | Sun, Mingsheng; Chengdu University of Traditional Chinese Medicine, College of Acupuncture and Tuina<br>Tao, Siyuan; Sichuan University, West China School of Public Health<br>Geng, Guoyan; Chengdu University of Traditional Chinese Medicine, College of Acupuncture and Tuina<br>Peng, Jieru; Sichuan University, West China School of Public Health<br>Ma, Xingsha; Chengdu University of Traditional Chinese Medicine, College of Acupuncture and Tuina<br>Yan, Mingxi; Chengdu University of Traditional Chinese Medicine, College of Acupuncture and Tuina<br>Chen, Jiao; Chengdu University of Traditional Chinese Medicine, College of Acupuncture and Tuina<br>Cai, Dingjun; Chengdu University of Traditional Chinese Medicine, College of Acupuncture and Tuina<br>Zheng, Hui ; Chengdu University of Traditional Chinese Medicine, College of Acupuncture and Tuina<br>Yang, Chunxia; Sichuan University, West China School of Public Health<br>Zhao, Ling; Chengdu University of Traditional Chinese Medicine, Acupuncture and Tuina School<br>Liang, Fan-rong; Chengdu University of Traditional Chinese Medicine |
| <b>Primary Subject Heading</b>: | Complementary medicine                                                                                                                                                                                                                                                                                                                                                                                                                                                                                                                                                                                                                                                                                                                                                                                                                                                                                                                                                                                                                                                                                                            |
| Secondary Subject Heading:      | Complementary medicine                                                                                                                                                                                                                                                                                                                                                                                                                                                                                                                                                                                                                                                                                                                                                                                                                                                                                                                                                                                                                                                                                                            |
| Keywords:                       | sensitized points, neck pain, study protocol, observational study                                                                                                                                                                                                                                                                                                                                                                                                                                                                                                                                                                                                                                                                                                                                                                                                                                                                                                                                                                                                                                                                 |
|                                 |                                                                                                                                                                                                                                                                                                                                                                                                                                                                                                                                                                                                                                                                                                                                                                                                                                                                                                                                                                                                                                                                                                                                   |

SCHOLARONE™  
Manuscripts

1  
2  
3  
4 **Identification of the optimal points for the acupuncture treatment of neck pain**  
5  
6 **in China: protocol for a multicenter, matched, case-control study**

7 Ming-Sheng Sun<sup>1†</sup>, Si-Yuan Tao<sup>2†</sup>, Guo-Yan Geng<sup>1†</sup>, Jie-Ru Peng<sup>2</sup>, Xing-Sha Ma<sup>1</sup>, Ming-Xi Yan<sup>1</sup>,  
8 Jiao Chen<sup>1</sup>, Ding-Jun Cai<sup>1</sup>, Hui Zheng<sup>1</sup>, Chun Xia Yang<sup>2</sup>, Ling Zhao<sup>1\*</sup>, Fan-Rong Liang<sup>1\*</sup>  
9  
10  
11

12  
13 † Ming-Sheng Sun, Si-Yuan Tao, and Guo-Yan Geng contributed equally to this work.  
14  
15

16  
17 <sup>1</sup> College of Acupuncture and Tuina, Chengdu University of Traditional Chinese Medicine,  
18 Chengdu, 610075, China  
19

20  
21 <sup>2</sup> West China School of Public Health, Sichuan University, Chengdu, 610041, China  
22  
23

24  
25 **\*Corresponding authors**

26  
27 Professor Ling Zhao

28  
29 Postal address: 37 Shierqiao Road, Chengdu, Sichuan, China

30  
31 Telephone: +86 13568801429

32  
33 Email: [ling94@163.com](mailto:ling94@163.com)  
34  
35

36  
37 Professor Fan-Rong Liang

38  
39 Postal address: 37 Shierqiao Road, Chengdu, Sichuan, China

40  
41 Telephone: +86 13608058216

42  
43 Email: [acuresearch@126.com](mailto:acuresearch@126.com)  
44  
45

46  
47 **Word count:** 2779 words  
48  
49

50  
51 **Keywords:** sensitized points, neck pain, study protocol, observational study  
52  
53  
54  
55  
56  
57  
58  
59  
60

## ABSTRACT

**Introduction:** Neck pain (NP) is a common condition that can be effectively treated by acupuncture. However, various treatment points prescription (such as local acupoints, distal acupoints, and sensitized acupoints) could be used. The present study aims to identify the types of sensitization and distribution of sensitized points in patients with NP, to analyze the cutoff values and sensitization rate for acupoint sensitization in patients, and to summarize the dominant forms of optimal sensitized points in patients. This information will be helpful in the choice of optimal points for the treatment of NP.

**Methods and analysis:** This multicenter, matched, case-control study will enroll 224 patients with NP, and 224 age- and sex-matched healthy subjects for control. Body surface temperature, mechanical pain threshold, pressure pain threshold, and skin resistance will be assessed at the 15 acupoints most frequently used to treat NP, and at the five body regions in which pain most frequently occurs. We believe that in the state of disease, the sensitive points occurs with high frequency, and the sensitive points of different sensitizations will overlap, and the final optimal points from overlap may be closely related to the selection of clinical treatment points. Hypothesis testing will be used to compare the differences in variables between cases and controls. In addition, receiver operating characteristic curve analysis will be used to explore the cutoff values of the sensitive states of heat, pain, and electrical resistance that indicate sensitization of the acupoint. The optimal points will be comprehensively determined by the acupoint sensitization rate and OR value.

**Ethics and dissemination:** Ethical approval of this study has been granted by the Research Ethical Committee of the Teaching Hospital of Chengdu University of Traditional Chinese Medicine (ID: 2018KL-016). The outcomes of the study will be disseminated through peer-reviewed publications.

**Trial registration:** ChiCTR1800016220.

### Strengths and limitations of this study

- ▶ This study will be the first observational study to evaluate the forms of sensitization and the distribution of sensitized points in patients with NP.
- ▶ This study will be the first to attempt to define the acupoint sensitization in patients with NP using a cutoff value for the identification of point sensitization.
- ▶ As this is the first study of its kind, only patients with nontraumatic NP with mobility deficits

1  
2  
3  
4 were included; patients with other NP with radiating pain or secondary NP, were excluded to reduce  
5 the bias caused by other factors and ensure consistency. However, this will limit the  
6 representativeness and generalizability of the study results.  
7  
8  
9

## 11 INTRODUCTION

13 Neck pain (NP) is a common clinical condition often accompanied by tenderness at sensitive points.  
14 The global lifetime prevalence of NP was 48.5% in 2006.[1] The prevalence of white-collar workers  
15 in China was 33.9-54.8% in 2016 and has an increase tendency in recent years,[2] imposing  
16 considerable personal and socioeconomic burdens. Muscle relaxants and non-steroidal anti-  
17 inflammatory drugs are used to treat this disease, however, such medications carry a risk of adverse  
18 effects, and neither drug is better than non-pharmacological alternative treatments.[1]  
19  
20  
21  
22  
23  
24

25 As non-pharmacological alternative treatments have reliable efficacy and availability, this type of  
26 treatment is gaining an increasing amount of recognition worldwide. Acupuncture is one type of  
27 non-pharmacological alternative treatment that can effectively treat NP. Although various studies  
28 have confirmed that acupuncture is effective, the outcome of acupuncture treatment is closely  
29 related to the point selections.[3] Previous studies have evaluated the use of local acupoints[4] or  
30 distal acupoints,[5] with all types of treatment points reportedly having a certain degree of clinical  
31 efficacy.  
32  
33  
34  
35  
36  
37

38 Recent Chinese research has found that acupoints can be sensitized, with associated changes in  
39 function and size, and thus can functionally switch from a relatively 'silent' state to a relatively  
40 'active' state. Treatment of an acupoint while it is in the 'active' state is thought to achieve a better  
41 clinical outcome, and this has become a focus in acupoint research.[6-8] There are diverse types of  
42 sensitivity manifested at sensitized points, including pain-sensitivity, heat-sensitivity, and form-  
43 sensitivity (appearance changes). Recent clinical studies report that a superior outcome is obtained  
44 using acupuncture at pain-sensitive points,[9] and moxibustion at heat-sensitive points[10] or  
45 visual-sensitive points.[11] However, most of the current observational studies have only focused  
46 on one form of sensitization in a small sample population, and thus are not comprehensive studies  
47 of various forms of sensitization.[6 10] The choice of optimal treatment points for NP in clinical  
48 practice is still controversial.  
49  
50  
51  
52  
53  
54  
55  
56  
57  
58  
59

60 Herein, we describe the protocol for an observational study that aims to identify the different types

1  
2  
3  
4 of sensitization (e.g. temperature, tenderness) and the distribution of sensitized acupoints in patients  
5 with NP, to analyze the cutoff values for acupoint sensitization in patients with NP, and to determine  
6 the most optimal sensitization types seen at sensitized points in patients with NP. We believe that  
7 in the state of disease, the sensitive points occurs with high frequency (manifested as changes in  
8 temperature, pain threshold etc), and the sensitive points of different sensitizations will overlap, and  
9 the final optimal points from overlap may be closely related to the selection of clinical treatment  
10 points. Previous small sample studies have confirmed the feasibility of sensitization testing.[7] The  
11 present study will provide a basis for the selection of the optimal treatment points for NP in clinical  
12 practice.  
13  
14  
15  
16  
17  
18  
19  
20  
21  
22

## 23 **METHODS AND ANALYSIS**

### 24 **Study design**

25  
26 This is a multicenter, age- and sex-matched, case-control study. The protocol was developed in  
27 accordance with the Strengthening the Reporting of Observational Studies in Epidemiology  
28 guidelines.[12] The study has been registered with ChiCTR at Current Controlled Trials  
29 (ChiCTR1800016203). A flowchart of the study design is shown in Figure 1.  
30  
31  
32  
33  
34  
35  
36

### 37 **Ethics**

38  
39 This study was designed in accordance with the principles of the Declaration of Helsinki. The study  
40 protocol has been approved by the Ethics Committee of the First Affiliated Hospital of Chengdu  
41 University of Traditional Chinese Medicine (approval number: 2018KL-016), and is registered on  
42 the primary registry in the World Health Organization registry network (Chinese Clinical Trial  
43 Registry: no. ChiCTR1800016203). Signed consent will be obtained from each participant after  
44 they have been informed of the study procedures, possible risks, and their right to withdraw from  
45 the study.  
46  
47  
48  
49  
50  
51  
52  
53

### 54 **Patients and healthy subjects**

#### 55 **Inclusion criteria**

56  
57 Patients are eligible for study inclusion if they: (1) have nontraumatic NP with mobility deficits in  
58 the acute and chronic stages (2) are males or females aged 18–60 years; (3) provide written informed  
59  
60

1  
2  
3  
4 consent for all procedures in this study.  
5  
6

7 Healthy subjects are eligible if they: (1) have no history of NP and/or restricted neck movement; (2)  
8 are males or females aged 18–60 years; (3) provide written informed consent for all procedures in  
9 this study.  
10  
11  
12  
13

#### 14 15 **Exclusion criteria**

16 Patients are not eligible if they: (1) have complicated neck or shoulder pain caused by cervical and  
17 intervertebral disc degeneration, such as other types of cervical spondylosis, shoulder peri-arthritis,  
18 rheumatic myofibrillar inflammation; (2) have history of neck fracture or surgery, or cervical  
19 congenital abnormality; (3) have serious disease related to the heart, liver, kidney, or hematopoietic  
20 system; (4) have difficulty in answering the questionnaires because of cognitive impairment; (5)  
21 have dermatopathic diseases; (6) are pregnant, breastfeeding, or planning a pregnancy during the  
22 study period.  
23  
24  
25  
26  
27  
28  
29  
30  
31

32 Healthy subjects are not eligible if they: (1) have serious disease related to the heart, liver, kidney,  
33 or hematopoietic system; (2) have cervical congenital abnormality; (3) have difficulty in answering  
34 the questionnaires because of cognitive impairment; (4) have dermatopathic diseases; (5) are  
35 pregnant, breastfeeding, or planning a pregnancy during the study period.  
36  
37  
38  
39  
40  
41  
42

#### 43 **Recruitment strategies**

44 We will recruit patients from the outpatient departments of Acupuncture and Moxibustion, and  
45 Orthopedics in five clinical centers in China: Chengdu University of Traditional Chinese Medicine,  
46 Hunan University of Traditional Chinese Medicine, Shaanxi University of Traditional Chinese  
47 Medicine, Shanxi University of Traditional Chinese Medicine, and Guiyang College of Traditional  
48 Chinese Medicine. Healthy subjects without neck or shoulder pain will comprise age- and sex-  
49 matched residents from the same communities as the patients. Recruitment strategies will include  
50 posting advertisements on social media (such as WeChat, which is similar to Facebook) and at  
51 community centers, or by word-of-mouth introductions through subjects already enrolled in the  
52 study. Patients or healthy subjects who consent to study participation will be examined and  
53  
54  
55  
56  
57  
58  
59  
60

diagnosed by a hospital doctor.

### Test regions, acupoints, and sensitized points

In accordance with the results of literature data-mining and expert consensus on the treatment of NP, we identified the 15 most frequently used acupoints (Table 1) and the five regions of the body with the most frequent occurrence of pain and the greatest degree of acupoint sensitization. The body was divided into five regions to standardize the treatment procedures and detection areas. Regions 1 and 2 are each bordered by the respective ipsilateral mastoid, sternal end of the clavicle, anterior axillary line, acromion, and C7 spinous process. Region 3 is the triangular region bordered by both sides of the mastoid and the C7 spinous process. Regions 4 and 5 are each bordered by the respective ipsilateral C7 spinous process, acromion, and axillary line; the two regions are divided by the posterior midline. These regions are the same as those used in previous studies on NP,[13] and include the upper trapezius, splenius capitis muscles, sternocleidomastoid, levator scapulae, infraspinatus, scalene, subscapularis muscles, and other neck muscles associated with NP.[14 15] These regions and acupoints are shown in Figure 2.

Investigators will mark the 29 acupoints on each patient. All investigators will attend training to make sure all practices are standardized. And the investigator was not told whether the subject was a patient or a healthy controls. The investigator will then palpate the detection area associated with each acupoint using the appropriate force (< 2,000 gf), and will identify the sensitized points that have pain/sourness/heaviness/fullness or nodules.

**Table 1** Acupoints selected for use in the study

| Acupoints            | Location                                                                                                                                             |
|----------------------|------------------------------------------------------------------------------------------------------------------------------------------------------|
| Jianjing (GB-21)     | On the shoulder, directly above the nipple, at the midpoint of the line connecting Dazhui (DU-14) with the acromial end of clavicle                  |
| Jianzhongshu (SI-15) | On the back, 2 cun lateral to the lower border of the spinous process of the 7 <sup>th</sup> cervical vertebra                                       |
| Wangu (GB-12)        | On the head, in the depression posterior and inferior to the mastoid process.                                                                        |
| Fengchi (GB-20)      | On the nape, below the occipital, on a level with Fengfu DU-16, in the depression between the upper portion of trapezius and the sternocleidomastoid |
| Tianzhu (BL-10)      | On the nape, 1.3 cun lateral to the posterior hairline, in the depression of the posterior hairline lateral to the trapezius muscle                  |

|    |                   |                                                                                                                                                                            |
|----|-------------------|----------------------------------------------------------------------------------------------------------------------------------------------------------------------------|
| 1  |                   |                                                                                                                                                                            |
| 2  |                   |                                                                                                                                                                            |
| 3  | Dazhui(DU-14)     | On the posterior median line, in the depression below the spinous process of the 7 <sup>th</sup> cervical vertebra                                                         |
| 4  |                   |                                                                                                                                                                            |
| 5  | Dazhu(BL-11)      | On the back, 1.5 cun lateral to the lower border of the spinous process of the 1 <sup>st</sup> thoracic vertebra                                                           |
| 6  |                   |                                                                                                                                                                            |
| 7  | Jianwaishu(SI-14) | On the back, 3 cun lateral to the lower border of the spinous process of the first thoracic vertebra                                                                       |
| 8  |                   |                                                                                                                                                                            |
| 9  | Tianliao(SJ-15)   | On the region of scapula, at the midpoint of the line connecting Jianjing GB-21 with Quyuan SI-13, on the superior angle of the scapula                                    |
| 10 |                   |                                                                                                                                                                            |
| 11 | Jugu(LI-16)       | In the upper portion of the shoulder, in the depression between the acromial end of clavicle and the scapular spine                                                        |
| 12 |                   |                                                                                                                                                                            |
| 13 | Tianzong(SI-11)   | In the region of the scapula, in the depression of the center of the subscapular fossa, on a level with the 4 <sup>th</sup> thoracic vertebra                              |
| 14 |                   |                                                                                                                                                                            |
| 15 | Shousanli(LI-10)  | Flexing the elbow, on the dorsal radial side of the forearm, on the line connecting Yangxi LI-5 with Quchi LI-11, 2cun below the transverse cubital crease                 |
| 16 |                   |                                                                                                                                                                            |
| 17 | Lieque(LU-7)      | On the radial margin of the forearm, 1.5 cun above the transverse crease of the wrist, between the branchioradial muscle and the long abductor muscle tendon of thumb      |
| 18 |                   |                                                                                                                                                                            |
| 19 | Zhongzhu(SJ-3)    | On the dorsum of the hand, in the depression between the 4 <sup>th</sup> and 5 <sup>th</sup> metacarpal bones, proximal to the 4 <sup>th</sup> metacarpalangeal joint      |
| 20 |                   |                                                                                                                                                                            |
| 21 | Houxi(SI-3)       | On the ulna side of the palm, proximate to the fifth metacarpophalangeal joint, at the end of transverse crease of metacarpophalangeal joint, at the dorsoventral boundary |
| 22 |                   |                                                                                                                                                                            |
| 23 |                   |                                                                                                                                                                            |
| 24 |                   |                                                                                                                                                                            |
| 25 |                   |                                                                                                                                                                            |
| 26 |                   |                                                                                                                                                                            |
| 27 |                   |                                                                                                                                                                            |
| 28 |                   |                                                                                                                                                                            |
| 29 |                   |                                                                                                                                                                            |
| 30 |                   |                                                                                                                                                                            |
| 31 |                   |                                                                                                                                                                            |
| 32 |                   |                                                                                                                                                                            |
| 33 |                   |                                                                                                                                                                            |

### Outcome measurements

All data collection for each patient will be completed on the same day.

### Body surface temperature

Thermal imaging technology has been widely applied to assess pain and muscle damage.[16 17] Each participant will be evaluated in a room with a constant temperature of 26°C. Investigators will use Fotric thermal imaging cameras (Fotric 226, IRS Systems Inc., Allen, TX, USA) to make measurements at each of the 29 acupoints in the five body regions. The temperature data of each point on the images will be analyzed using professional software (AnalyzeIR, IRS Systems Inc., Allen, TX, USA).

### Mechanical pain threshold

Investigators will use the electronic Von Frey esthesiometer (type 2390, IITC Life Science, Woodland Hills, CA, USA) to make two measurements of the mechanical pain threshold at each of



1  
2  
3  
4 the 29 acupoints in the five body regions in turn. Previous studies have found that the device can  
5 detect hyperalgesia and changes in sensory nerve function.[18-20] Mechanical pain caused by  
6 punctate stimuli is related to A<sub>δ</sub>-fibers.[21] If there is a difference of more than 15 g between the  
7 two measurements of mechanical pain threshold made at one acupoint, the mechanical pain  
8 threshold at that acupoint will be measured a third time. Progressive pressure will be applied at a  
9 rate of 10 g/s at each acupoint. The average mechanical pain threshold will be calculated for each  
10 acupoint. To reduce the consecutive assessment error for two adjacent points, a method of alternate  
11 assessment of acupoints on the left and right sides of the body will be adopted.

### 21 **Pressure pain threshold**

22  
23 The pressure pain threshold (PPT) is widely used in clinical practice as a semi-objective method  
24 with which to quantify localized pain.[22 23] Pain caused by blunt pressure stimuli is related to C-  
25 fibers.[21] Investigators will use the FDIX Force Gauge (Force One™ FDIX, Wagner Instruments,  
26 Greenwich, CT, USA) to make two measurements of the PPT at each of the 29 acupoints in the five  
27 body regions in turn. If there is a difference of more than 500 gf between the two PPT measurements  
28 performed at one acupoint, the PPT at that acupoint will be measured a third time. Progressive  
29 pressure will be applied at a rate of 100 gf/s at each acupoint. The average PPT will be calculated  
30 for each acupoint. A method of alternate assessment of the acupoints on the left and right sides of  
31 the body will again be adopted.

### 42 **Skin resistance**

43  
44 Investigators will use the Acupoint dynamics research instrument (LMR30-RⅢ, Peking  
45 University, Beijing, China) to record the skin resistance at nine acupoints (GB-21, GB-20, BL-11,  
46 LI-10, SI-3; bilateral) and at the two most sensitive points (if there are two sensitive points).

### 52 **Pain**

53  
54 NP will be measured using the Visual Analogue Scale, the Northwick Park Neck Pain Questionnaire,  
55 and the McGill Pain Questionnaire. The Visual Analogue Scale will be used to measure the severity  
56 of pain. The Northwick Park Neck Pain Questionnaire provides a reliable outcome measure for  
57 patients with NP, while the McGill Pain Questionnaire is used to measure the different qualities of  
58  
59  
60

1  
2  
3  
4 the subjective pain experience; these questionnaires have been proven valid, and are convenient for  
5 patients to complete.[24 25]  
6  
7  
8

### 9 **Neck function**

10 The change in neck function will be evaluated by measuring the cervical range of motion.  
11  
12  
13

### 14 **General demographic information**

15 This will include the collection of data regarding age, disease duration, medical history, and  
16 medication type and dosage.  
17  
18  
19  
20  
21  
22

### 23 **Safety and adverse events**

24 Non-invasive assessments of the body surface do not generally cause adverse events. However, we  
25 will still record the number and type (e.g. serious pain, fainting) of adverse events in each group.  
26  
27 Participants who experience adverse events will receive the appropriate intervention. Adverse  
28 events will be immediately reported to the primary investigator and the ethics committee, and the  
29 affected participants will be withdrawn from the study.  
30  
31  
32  
33  
34  
35  
36

### 37 **Patients and public involvement**

38 Patients and public were not involved.  
39  
40  
41  
42

### 43 **Sample size calculation**

44 Previous study indicated that the rate of acupoint sensitization in patients ranged from 20% to  
45 70%,[26] so we set this rate at 50% to calculate the minimum sample size required for the proposed  
46 study. With acupoint sensitization rate of 20% in healthy subjects, the odds ratio is 4. According to  
47 Chow's formula in comparing two sample proportion,[27] we assumed an  $\alpha$  level of 0.05, a  $\beta$  of  
48 0.01, thus, the smallest sample size is 408 with two-sided confidence and a ratio of control subjects  
49 to cases of 1 (TrialSize package in R software). Considering the potential non-response rate and  
50 sampling effectiveness as 10%, the final sample size is 448 (224 patients, plus 224 age- and sex-  
51 matched healthy subjects).  
52  
53  
54  
55  
56  
57  
58  
59  
60

### Statistical analysis

Data will be blinded, double-entered in EpiData 3.1 software, and adequately checked for errors. SPSS 21.0 (SPSS Inc., Chicago, IL, USA) will then be used to complete the statistical analyses. The statistical data evaluation will be independently performed by the West China School of Public Health at Sichuan University, China. Missing data will be processed without imputation. First, the distribution of basic information in the case and control groups will be described, including age, sex, height, weight, job occupation, and education level. Data will be presented as means (SD) for continuous variables, and as frequency (percentage) for categorical variables. The distributions of sensitized points will be shown in scatter plots to represent the skin morphological changes. The distributions of the intensity of NP and neck function will also be described. Hypothetical testing will then be performed to assess the differences between the case and control groups in body surface sensations and biophysical properties, including body surface temperature, mechanical pain threshold, PPT, and skin resistance. Parametric statistical testing (t-test) will be used for data that are normally distributed; otherwise, non-parametric statistical testing (Wilcoxon's signed rank test) will be used. If there is a difference between the case and control groups in body surface temperature, mechanical pain threshold, PPT, or skin resistance, the cut-off values for these indexes to distinguish between sensitive and non-sensitive states (including heat-sensitivity, pain-sensitivity, and electrical-sensitivity) will be detected using receiver operating characteristic curve analyses. Finally, the acupoint sensitization rates of patients and healthy subjects will be calculated separately regarding the aspects of heat, pain, and electrical sensitivity to identify the most important form of sensitivity for all acupoints. Meanwhile, OR represents the ratio of acupoint sensitization of patients and healthy subjects. Therefore, this study combines OR and sensitization rate of all acupoints to find out the optimal points in each sensitization.

### Quality control

This is a multi-center observational study, and so quality control will play a vital role in the extrapolation of the conclusion. To ensure the integrity of the study and protect the rights and health of the participants, we will set up a Data and Safety Monitoring Board. The Data and Safety Monitoring Board will be developed in accordance with the Operational Guidelines for the Establishment and Functioning of the Data and Safety Monitoring Boards of the World Health

1  
2  
3  
4 Organization. Separate from the Data and Safety Monitoring Board, a quality control group will be  
5 established to guarantee the validity and reliability of results. Before study commencement,  
6 fieldwork operation manuals will be prepared, and pilot study participants from all centers will  
7 undergo training in accordance with the standard operating procedure of this study. Every 3 months,  
8 members of the quality control group will conduct a quality control review at each study site, and  
9 produce a report regarding the quality analysis of the whole data collection process.  
10  
11  
12  
13  
14  
15  
16

## 17 **DISCUSSION**

18  
19 NP is the third-most common chronic pain condition, and the fourth leading cause of disability  
20 worldwide.[28] Acupuncture is a popular non-pharmacological modality used to relieve pain. The  
21 latest research has found that the performance of acupuncture at sensitive points may provide the  
22 most effective treatment.[8 29] When the body is in a diseased state, there will be morphological  
23 form-sensitive point changes, such as nodules, pimples, uplifting, dimpling, and changes in skin  
24 color.[30] Thermal image detection has proved that the temperature of corresponding acupoints will  
25 be obviously abnormal when a patient has visceral illness, such as diseases of the heart, lung, and  
26 stomach, which indicates that the temperature of acupoints can reflect the physiological and  
27 pathological phenomena of the affected organs.[31] Studies have confirmed that the PPT at  
28 acupoints changes when patients are in a diseased state.[6 32 33] The degree of change in the PPT  
29 may reflect the intensity of acupoint sensitization, and may be related to the disease status.[34] This  
30 proposed observational study will bridge the knowledge gap regarding the optimal sensitization of  
31 acupoints in various forms of point sensitivity in patients with NP.  
32  
33  
34  
35  
36  
37  
38  
39  
40  
41  
42  
43

44 As this will be the first study to evaluate the association between acupoint sensitization and NP, this  
45 observational study may have some limitations. The main limitation is that in order to reduce the  
46 bias caused by other factors and to ensure consistency, this study will only include patients with  
47 nontraumatic NP with mobility deficits, while excluding patients with other types of NP (such as  
48 NP with radiating pain or secondary NP). Furthermore, as the four participating centers are located  
49 in four different regions in China, it may be difficult to implement quality control; thus, quality  
50 control reviews will be conducted every 3 months.  
51  
52  
53  
54  
55  
56

57 In conclusion, this article describes the design and protocol of a study that aims to observe the  
58 different types of sensitization (e.g. temperature, tenderness) and the distribution of sensitized  
59  
60

1  
2  
3  
4 acupoints in patients with NP, to analyze the cutoff values for acupoint sensitization in patients with  
5 NP, and to identify the dominant sensitized forms of the sensitized points in patients with NP. The  
6 results will provide a basis for the selection of clinically optimal acupuncture points for NP.  
7  
8  
9

### 10 11 **Acknowledgments**

12  
13 We thank the staff of Chengdu CTC Tianfu Digital Technology Inc. for providing images. We  
14 acknowledge the help and contributions from the subjects, investigators, and experts in each center.  
15 We thank Kelly Zammit, BVSc, from Liwen Bianji, Edanz Editing China ([www.liwenbianji.cn/ac](http://www.liwenbianji.cn/ac)),  
16 for editing the English text of a draft of this manuscript.  
17  
18  
19  
20  
21  
22

### 23 **Authors' contributions**

24 MSS, SYT, JRP, DJC, CXY, HZ, LZ, and FRL participated in the design of the trial, in creating the  
25 data analysis plan, and in drafting the manuscript. GYG, XSM, MXY, and JC collected the  
26 information needed for the performance of this trial in each center. All of the authors discussed,  
27 read, and revised the manuscript, and gave final approval for the publication of this study protocol.  
28  
29  
30  
31  
32  
33

### 34 **Funding**

35 This work was financially supported by the National Natural Science Foundation of China (no.  
36 81590950, 81590951, 81722050).  
37  
38  
39  
40  
41  
42

### 43 **Competing interests**

44 The authors declare that they have no competing interests.  
45  
46  
47

### 48 **Ethics approval**

49 The study protocol has been approved by the institutional review board and ethics committee of the  
50 First Affiliated Hospital of Chengdu University of Traditional Chinese Medicine (May 2018).  
51  
52  
53  
54  
55

### 56 **Provenance and peer review**

57 Not commissioned; internally peer reviewed.  
58  
59  
60

## Open Access

This is an Open Access article distributed in accordance with the Creative Commons Attribution Non Commercial (CCBY-NC 3.0) license, which permits others to distribute, remix, adapt, build upon this work noncommercially, and license their derivative works on different terms, provided the original work is properly cited and the use is non-commercial. See: <http://creativecommons.org/licenses/by-nc/3.0/>

## REFERENCES

1. Fejer R, Kyvik KO, Hartvigsen J. The prevalence of neck pain in the world population: a systematic critical review of the literature. *European spine journal : official publication of the European Spine Society, the European Spinal Deformity Society, and the European Section of the Cervical Spine Research Society* 2006;**15**(6):834-48 doi: 10.1007/s00586-004-0864-4[published Online First: Epub Date]].
2. Guidelines for grading diagnosis and treatment of cervical spondylosis in Anhui Province, China (安徽省颈椎病分级诊疗指南) . *Anhui Medical Journal* 2017;**38**(9)
3. White AR, Ernst E. A systematic review of randomized controlled trials of acupuncture for neck pain. *Rheumatology (Oxford, England)* 1999;**38**(2):143-7
4. Mejuto-Vazquez MJ, Salom-Moreno J, Ortega-Santiago R, et al. Short-term changes in neck pain, widespread pressure pain sensitivity, and cervical range of motion after the application of trigger point dry needling in patients with acute mechanical neck pain: a randomized clinical trial. *The Journal of orthopaedic and sports physical therapy* 2014;**44**(4):252-60 doi: 10.2519/jospt.2014.5108[published Online First: Epub Date]].
5. Irnich D, Behrens N, Gleditsch JM, et al. Immediate effects of dry needling and acupuncture at distant points in chronic neck pain: results of a randomized, double-blind, sham-controlled crossover trial. *Pain* 2002;**99**(1-2):83-9
6. Yan CQ, Zhang S, Li QQ, et al. Detection of peripheral and central sensitisation at acupoints in patients with unilateral shoulder pain in Beijing: a cross-sectional matched case-control study. *BMJ open* 2017;**7**(6):e014438 doi: 10.1136/bmjopen-2016-014438[published Online First: Epub Date]].
7. Luo YN, Zhou YM, Zhong X, et al. Observation of Pain-Sensitive Points in Patients with Knee Osteoarthritis: A Pilot Study. *European Journal of Integrative Medicine* 2018
8. Chen RX, Kang MF. Acupoint heat-sensitization and its clinical significance. *Journal of Traditional Chinese Medicine* 2006;**2001**(4):488-9
9. Yao ZL, Liu F, Song NC. 40 Cases of Neck Type of Cervical Spondylosis Treated by Acupotomy Based on the Theory of Trigger point(基于激痛点理论应用针刀治疗颈型颈椎病 40 例). *Zhongguo zhen jiu = Chinese acupuncture & moxibustion* 2016;**36**(11):1155-55
10. Zhang H, Xu N, Huang R, et al. Heat-Sensitive Moxibustion in Treatment of Cervical Spondylosis. *Liaoning Journal of Traditional Chinese Medicine* 2016(12):2631-34
11. Xiao L, Meng X, Du S, et al. Therapeutic Observation of Heavy-dose Moxibustion at Sha-petechiae for Neck-type Cervical Spondylosis Due to Cold Coagulation and Blood Stagnation. *Shanghai*

- Journal of Acupuncture and Moxibustion 2017(11):1336-39
12. von Elm E, Altman DG, Egger M, et al. Strengthening the Reporting of Observational Studies in Epidemiology (STROBE) statement: guidelines for reporting observational studies. *BMJ (Clinical research ed)* 2007;**335**(7624):806-8 doi: 10.1136/bmj.39335.541782.AD[published Online First: Epub Date]].
  13. Croft PR, Lewis M, Papageorgiou AC, et al. Risk factors for neck pain: a longitudinal study in the general population. *Pain* 2001;**93**(3):317-25
  14. Falla D, Lindstrøm R, Rechter L, et al. Effectiveness of an 8-week exercise programme on pain and specificity of neck muscle activity in patients with chronic neck pain: A randomized controlled study. *European Journal of Pain* 2013;**17**(10):1517-28
  15. Cagnie B, Castelein B, Pollie F, et al. Evidence for the Use of Ischemic Compression and Dry Needling in the Management of Trigger Points of the Upper Trapezius in Patients with Neck Pain: A Systematic Review. *American journal of physical medicine & rehabilitation* 2015;**94**(7):573-83 doi: 10.1097/phm.000000000000266[published Online First: Epub Date]].
  16. Ring EF, Ammer K. Infrared thermal imaging in medicine. *Physiological measurement* 2012;**33**(3):R33-46 doi: 10.1088/0967-3334/33/3/r33[published Online First: Epub Date]].
  17. Adamczyk JG, Krasowska I, Boguszewski D, et al. The use of thermal imaging to assess the effectiveness of ice massage and cold-water immersion as methods for supporting post-exercise recovery. *Journal of thermal biology* 2016;**60**:20-5 doi: 10.1016/j.jtherbio.2016.05.006[published Online First: Epub Date]].
  18. Neto MLP, Maciel LYS, Cruz KML, et al. Does electrode placement influence tens-induced antihyperalgesia in experimental inflammatory pain model? *Brazilian journal of physical therapy* 2017;**21**(2):92-99 doi: 10.1016/j.bjpt.2017.03.003[published Online First: Epub Date]].
  19. Yamamoto S, Ono H, Kume K, et al. Oxaliplatin treatment changes the function of sensory nerves in rats. *Journal of pharmacological sciences* 2016;**130**(4):189-93 doi: 10.1016/j.jpshs.2015.12.004[published Online First: Epub Date]].
  20. Chen Y, Yao Y, Wu Y, et al. Transcutaneous electric acupoint stimulation alleviates remifentanyl-induced hyperalgesia in patients undergoing thyroidectomy: a randomized controlled trial. *International journal of clinical and experimental medicine* 2015;**8**(4):5781-7
  21. Beissner F, Brandau A, Henke C, et al. Quick discrimination of A(delta) and C fiber mediated pain based on three verbal descriptors. *PloS one* 2010;**5**(9):e12944 doi: 10.1371/journal.pone.0012944[published Online First: Epub Date]].
  22. Persson AL, Brogårdh C, Sjölund BH. Tender or not tender: test-retest repeatability of pressure pain thresholds in the trapezius and deltoid muscles of healthy women. *Journal of rehabilitation medicine* 2004;**36**(1):17
  23. Fischer AA. Pressure algometry over normal muscles. Standard values, validity and reproducibility of pressure threshold. *Pain* 1987;**30**(1):115-26
  24. Chiu TT, Lam TH, Hedley AJ. Subjective health measure used on Chinese patients with neck pain in Hong Kong. *Spine* 2001;**26**(17):1884-9
  25. Burckhardt CS, Jones KD. Adult measures of pain: The McGill Pain Questionnaire (MPQ), Rheumatoid Arthritis Pain Scale (RAPS), Short - Form McGill Pain Questionnaire (SF - MPQ), Verbal Descriptive Scale (VDS), Visual Analog Scale (VAS), and West Haven - Yale Multidisciplinary Pain. *Arthritis Care & Research* 2010;**49**(S5):0-0
  26. Chen R, Kang M. Acupoint Heat-Sensitization and Its Clinical Significance. *Journal of Traditional*

- 1  
2  
3 Chinese Medicine 2006;**2001**(4):488-9
- 4 27. Chow SC, Shao J, Wang H. *Sample size calculations in clinical research*. New York: Marcel Dekker,  
5 2003.
- 6  
7 28. Hoy D, March L, Woolf A, et al. The global burden of neck pain: estimates from the global burden of  
8 disease 2010 study. *Annals of the rheumatic diseases* 2014;**73**(6):968
- 9  
10 29. Zhang S, Wang W, Zou L, et al. [Acupoints heat-sensitive moxibustion in the application of traditional  
11 Chinese surgery]. *Zhongguo zhen jiu = Chinese acupuncture & moxibustion* 2016;**36**(1):109-12
- 12  
13 30. Zhou S, Yin H, Huai M. Progress and Prospect of the Study on the Correlation Mechanism of Surface  
14 and Visceral Phase. *Acupuncture Research* 1982(02)
- 15  
16 31. Shui YL, Institute QH, Pasadena. Infrared imaging system as a versatile diagnostic and auxiliary  
17 treatment tool in Chinese Medicine.
- 18  
19 32. Chen S, Miao Y, Nan Y, et al. The Study of Dynamic Characteristic of Acupoints Based on the Primary  
20 Dysmenorrhea Patients with the Tenderness Reflection on Diji (SP 8). *Evidence-Based  
21 Complementray and Alternative Medicine*,2015,(2015-6-16) 2015;**2015**:158012
- 22  
23 33. Chae Y, Kim HY, Lee HJ, et al. The alteration of pain sensitivity at disease-specific acupuncture points  
24 in premenstrual syndrome. *Journal of Physiological Sciences* 2007;**57**(2):115-19
- 25  
26 34. Tunks E, Crook J, Norman G, et al. Tender points in fibromyalgia. *Pain* 1988;**34**(1):11
- 27  
28  
29  
30

31 **Figure 1** Flowchart of the study design.

32

33 **Figure 2** The test regions and acupoints that will be used in the study.

34  
35  
36  
37  
38  
39  
40  
41  
42  
43  
44  
45  
46  
47  
48  
49  
50  
51  
52  
53  
54  
55  
56  
57  
58  
59  
60





45 Flowchart of the study design.

46 53x89mm (600 x 600 DPI)

1  
2  
3  
4  
5  
6  
7  
8  
9  
10  
11  
12  
13  
14  
15  
16  
17  
18  
19  
20  
21  
22  
23  
24  
25  
26  
27  
28  
29  
30  
31  
32  
33  
34  
35  
36  
37  
38  
39  
40  
41  
42  
43  
44  
45  
46  
47  
48  
49  
50  
51  
52  
53  
54  
55  
56  
57  
58  
59  
60



The test regions and acupoints that will be used in the study.

90x71mm (600 x 600 DPI)

## STROBE Statement—checklist of items that should be included in reports of observational studies

|                           | Item No. | Recommendation                                                                                      | Page No. | Relevant text from manuscript                                                                                                                                                                                                                                                                                                                                                                                               |
|---------------------------|----------|-----------------------------------------------------------------------------------------------------|----------|-----------------------------------------------------------------------------------------------------------------------------------------------------------------------------------------------------------------------------------------------------------------------------------------------------------------------------------------------------------------------------------------------------------------------------|
| <b>Title and abstract</b> | 1        | (a) Indicate the study's design with a commonly used term in the title or the abstract              | 1        | a multicenter, matched, case-control study                                                                                                                                                                                                                                                                                                                                                                                  |
|                           |          | (b) Provide in the abstract an informative and balanced summary of what was done and what was found | 2        | The present study aims to identify the types of sensitization (e.g. temperature, tenderness) and distribution of sensitized points in patients with NP, to analyze the cutoff values and sensitization rate for acupoint sensitization in patients, and to summarize the dominant forms of optimal sensitized points in patients. This information will be helpful in the choice of optimal points for the treatment of NP. |
| <b>Introduction</b>       |          |                                                                                                     |          |                                                                                                                                                                                                                                                                                                                                                                                                                             |
| Background/rationale      | 2        | Explain the scientific background and rationale for the investigation being reported                | 3        | Recent Chinese research has found that acupoints can be sensitized, with associated changes in function and size, and thus can functionally switch from a relatively 'silent' state to a relatively 'active' state. Treatment of an acupoint while it is in the 'active' state is thought to achieve a better clinical outcome, and this has become a focus in acupoint research.[6-8] There are                            |

1  
2  
3  
4  
5  
6  
7  
8  
9  
10  
11  
12  
13  
14  
15  
16  
17  
18  
19  
20  
21  
22  
23  
24  
25  
26  
27  
28  
29  
30  
31  
32  
33  
34  
35  
36  
37  
38  
39  
40  
41  
42  
43  
44  
45  
46

For peer review only

diverse types of sensitivity manifested at sensitized points, including pain-sensitivity, heat-sensitivity, and form-sensitivity (appearance changes). Recent clinical studies report that a superior outcome is obtained using acupuncture at pain-sensitive points,[9] and moxibustion at heat-sensitive points[10] or visual-sensitive points.[11] However, most of the current observational studies have only focused on one form of sensitization in a small sample population, and thus are not comprehensive studies of various forms of sensitization.[6 10] The choice of optimal treatment points for NP in clinical practice is still controversial.

Objectives 3 State specific objectives, including any prespecified hypotheses 4

We describe the protocol for an observational study that aims to identify the different types of sensitization (e.g. temperature, tenderness) and the distribution of sensitized acupoints in patients with NP, to analyze the cutoff values for acupoint sensitization in patients with NP, and to determine the most optimal sensitization types seen at sensitized points in patients with NP. We believe that in the

state of disease, the sensitive points occurs with high frequency (manifested as changes in temperature, pain threshold etc), and the sensitive points of different sensitizations will overlap, and the final optimal points from overlap may be closely related to the selection of clinical treatment points. And the different sensations of point may suggest selection of interventions. Previous small sample studies have confirmed the feasibility of sensitization testing.[7] The present study will provide a basis for the selection of the optimal treatment points for NP in clinical practice.

---

## Methods

|              |   |                                                                                                                                 |     |                                                                                                                                                                                                     |
|--------------|---|---------------------------------------------------------------------------------------------------------------------------------|-----|-----------------------------------------------------------------------------------------------------------------------------------------------------------------------------------------------------|
| Study design | 4 | Present key elements of study design early in the paper                                                                         | 4   | This is a multicenter, age- and sex-matched, case-control study. The protocol was developed in accordance with the Strengthening the Reporting of Observational Studies in Epidemiology guidelines. |
| Setting      | 5 | Describe the setting, locations, and relevant dates, including periods of recruitment, exposure, follow-up, and data collection | 5,6 | We will recruit patients from the outpatient departments of Acupuncture and Moxibustion, and Orthopedics in five clinical centers in China: Chengdu University of                                   |

1  
2  
3  
4  
5  
6  
7  
8  
9  
10  
11  
12  
13  
14  
15  
16  
17  
18  
19  
20  
21  
22  
23  
24  
25  
26  
27  
28  
29  
30  
31  
32  
33  
34  
35  
36  
37  
38  
39  
40  
41  
42  
43  
44  
45  
46

For peer review only

Traditional Chinese Medicine, Hunan University of Traditional Chinese Medicine, Shaanxi University of Traditional Chinese Medicine, Shanxi University of Traditional Chinese Medicine, and Guiyang College of Traditional Chinese Medicine. Healthy subjects without neck or shoulder pain will comprise age- and sex-matched residents from the same communities as the patients. Recruitment strategies will include posting advertisements on social media (such as WeChat, which is similar to Facebook) and at community centers, or by word-of-mouth introductions through subjects already enrolled in the study.

Participants 6 (a) *Cohort study*—Give the eligibility criteria, and the sources and methods of selection of participants. Describe methods of follow-up  
*Case-control study*—Give the eligibility criteria, and the sources and methods of case ascertainment and control selection. Give the rationale for the choice of cases and controls  
*Cross-sectional study*—Give the eligibility criteria, and the sources and methods of selection of participants

4, 5, 9, 10

Patients are eligible for study inclusion if they: (1) have no history of NP and/or restricted neck movement; (2) are males or females aged 18–60 years; (3) provide written informed consent for all procedures in this study. Patients or healthy subjects who consent to study participation will be examined and diagnosed by a hospital doctor.

(b) *Cohort study*—For matched studies, give matching criteria and number of exposed and

5, 9, 10

Healthy subjects are eligible if

1  
2  
3  
4  
5  
6  
7  
8  
9  
10  
11  
12  
13  
14  
15  
16  
17  
18  
19  
20  
21  
22  
23  
24  
25  
26  
27  
28  
29  
30  
31  
32  
33  
34  
35  
36  
37  
38  
39  
40  
41  
42  
43  
44  
45  
46

unexposed

*Case-control study*—For matched studies, give matching criteria and the number of controls per case

they: (1) have no history of neck pain and/or restricted neck movement; (2) are males or females aged 18–60 years; (3) provide written informed consent for all procedures in this study. Healthy subjects without neck or shoulder pain will comprise age- and sex-matched residents from the same communities as the patients. A ratio of control subjects to cases of 1.

|                              |    |                                                                                                                                                                                      |     |                                                                                                                                                                                                                                                                                                                                                                                                                                          |
|------------------------------|----|--------------------------------------------------------------------------------------------------------------------------------------------------------------------------------------|-----|------------------------------------------------------------------------------------------------------------------------------------------------------------------------------------------------------------------------------------------------------------------------------------------------------------------------------------------------------------------------------------------------------------------------------------------|
| Variables                    | 7  | Clearly define all outcomes, exposures, predictors, potential confounders, and effect modifiers. Give diagnostic criteria, if applicable                                             | 7-9 | Body surface temperature, Mechanical pain threshold, Pressure pain threshold, Skin resistance, Pain, Neck function, General demographic information, Safety and adverse events.                                                                                                                                                                                                                                                          |
| Data sources/<br>measurement | 8* | For each variable of interest, give sources of data and details of methods of assessment (measurement). Describe comparability of assessment methods if there is more than one group | 7-9 | Body surface temperature: Each participant will be evaluated in a room with a constant temperature of 26°C. Investigators will use Fotric thermal imaging cameras (Fotric 226, IRS Systems Inc., Allen, TX, USA) to make measurements at each of the 29 acupoints in the five body regions. The temperature data of each point on the images will be analyzed using professional software (AnalyzeIR, IRS Systems Inc., Allen, TX, USA). |

1  
2  
3  
4  
5  
6  
7  
8  
9  
10  
11  
12  
13  
14  
15  
16  
17  
18  
19  
20  
21  
22  
23  
24  
25  
26  
27  
28  
29  
30  
31  
32  
33  
34  
35  
36  
37  
38  
39  
40  
41  
42  
43  
44  
45  
46

---

Mechanical pain threshold:  
Investigators will use the electronic Von Frey esthesiometer (type 2390, IITC Life Science, Woodland Hills, CA, USA) to make two measurements of the mechanical pain threshold at each of the 29 acupoints in the five body regions in turn. If there is a difference of more than 15 g between the two measurements of mechanical pain threshold made at one acupoint, the mechanical pain threshold at that acupoint will be measured a third time. Progressive pressure will be applied at a rate of 10 g/s at each acupoint. The average mechanical pain threshold will be calculated for each acupoint. To reduce the consecutive assessment error for two adjacent points, a method of alternate assessment of acupoints on the left and right sides of the body will be adopted.

Pressure pain threshold:  
Investigators will use the FDIX Force Gauge (Force One™ FDIX, Wagner Instruments, Greenwich, CT, USA) to make two measurements of the PPT at each of the 29 acupoints in the five body regions in turn. If there is a

---



1  
2  
3  
4  
5  
6  
7  
8  
9  
10  
11  
12  
13  
14  
15  
16  
17  
18  
19  
20  
21  
22  
23  
24  
25  
26  
27  
28  
29  
30  
31  
32  
33  
34  
35  
36  
37  
38  
39  
40  
41  
42

---

difference of more than 500 gf between the two PPT measurements performed at one acupoint, the PPT at that acupoint will be measured a third time. Progressive pressure will be applied at a rate of 100 gf/s at each acupoint. The average PPT will be calculated for each acupoint. A method of alternate assessment of the acupoints on the left and right sides of the body will again be adopted.

Skin resistance: Investigators will use the Acupoint dynamics research instrument (LMR30-RIII, Peking University, Beijing, China) to record the skin resistance at nine acupoints (GB-21, GB-20, BL-11, LI-10, SI-3; bilateral) and at the two most sensitive points (if there are two sensitive points).

Pain: Neck pain will be measured using the Visual Analogue Scale, the Northwick Park Neck Pain Questionnaire, and the McGill Pain Questionnaire. The Visual Analogue Scale will be used to measure the severity of pain. The Northwick Park Neck Pain Questionnaire provides a reliable outcome measure for patients with

neck pain, while the McGill Pain Questionnaire is used to measure the different qualities of the subjective pain experience; these questionnaires have been proven valid, and are convenient for patients to complete.

Neck function: The change in neck function will be evaluated by measuring the cervical range of motion before and after treatment.

General demographic information This will include the collection of data regarding age, disease duration, medical history, and medication type and dosage.

Safety and adverse events: Non-invasive assessments of the body surface do not generally cause adverse events. However, we will still record the number and type (e.g. serious pain, fainting) of adverse events in each group.

Participants who experience adverse events will receive the appropriate intervention. Adverse events will be immediately reported to the primary investigator and the ethics committee, and the affected participants will be withdrawn from the study.

|      |   |                                                           |           |                               |
|------|---|-----------------------------------------------------------|-----------|-------------------------------|
| Bias | 9 | Describe any efforts to address potential sources of bias | 6, 10, 11 | All investigators will attend |
|------|---|-----------------------------------------------------------|-----------|-------------------------------|

training to make sure all practices are standardized. And the investigator was not told whether the subject was a patient or a healthy controls.

Data will be blinded, double-entered in EpiData 3.1 software, and adequately checked for errors. To ensure the integrity of the study and protect the rights and health of the participants, we will set up a Data and Safety Monitoring Board. Every 3 months, members of the quality control group will conduct a quality control review at each study site, and produce a report regarding the quality analysis of the whole data collection process.

|            |    |                                           |   |                                                                                                                                                                                                                                                                                                                                                                                                                                                                                                                                |
|------------|----|-------------------------------------------|---|--------------------------------------------------------------------------------------------------------------------------------------------------------------------------------------------------------------------------------------------------------------------------------------------------------------------------------------------------------------------------------------------------------------------------------------------------------------------------------------------------------------------------------|
| Study size | 10 | Explain how the study size was arrived at | 9 | <p>Previous study indicated that the rate of acupoint sensitization in patients ranged from 20% to 70%[26], so we set this rate at 50% to calculate the minimum sample size required for the proposed study. With acupoint sensitization rate of 20% in healthy subjects, the odds ratio is 4. According to Chow's formula in comparing two sample proportion[27], we assumed an <math>\alpha</math> level of 0.05, a <math>\beta</math> of 0.01, a delta of 0.3 (50%-20%=30%), thus, the smallest sample size is 408 with</p> |
|------------|----|-------------------------------------------|---|--------------------------------------------------------------------------------------------------------------------------------------------------------------------------------------------------------------------------------------------------------------------------------------------------------------------------------------------------------------------------------------------------------------------------------------------------------------------------------------------------------------------------------|

1  
2  
3  
4  
5  
6  
7  
8  
9  
10  
11  
12  
13  
14  
15  
16  
17  
18  
19  
20  
21  
22  
23  
24  
25  
26  
27  
28  
29  
30  
31  
32  
33  
34  
35  
36  
37  
38  
39  
40  
41  
42  
43  
44  
45  
46

|                        |    |                                                                                                                              |    |                                                                                                                                                                                                                                                                                                                                                                                                                                                                                                                                                                                         |
|------------------------|----|------------------------------------------------------------------------------------------------------------------------------|----|-----------------------------------------------------------------------------------------------------------------------------------------------------------------------------------------------------------------------------------------------------------------------------------------------------------------------------------------------------------------------------------------------------------------------------------------------------------------------------------------------------------------------------------------------------------------------------------------|
|                        |    |                                                                                                                              |    | two-sided confidence and a ratio of control subjects to cases of 1 (TrialSize package in R software). Considering the potential non-response rate and sampling effectiveness as 10%, the final sample size is 448 (224 patients, plus 224 age- and sex-matched healthy subjects).                                                                                                                                                                                                                                                                                                       |
| Quantitative variables | 11 | Explain how quantitative variables were handled in the analyses. If applicable, describe which groupings were chosen and why | 10 | Parametric statistical testing (t-test) will be used for data that are normally distributed; otherwise, non-parametric statistical testing (Wilcoxon’s signed rank test) will be used.                                                                                                                                                                                                                                                                                                                                                                                                  |
| Statistical methods    | 12 | (a) Describe all statistical methods, including those used to control for confounding                                        | 10 | First, the distribution of basic information in the case and control groups will be described, including age, sex, height, weight, job occupation, and education level. Data will be presented as means (SD) for continuous variables, and as frequency (percentage) for categorical variables. The distributions of sensitized points will be shown in scatter plots to represent the skin morphological changes. The distributions of the intensity of NP and neck function will also be described. Hypothetical testing will then be performed to assess the differences between the |

1  
2  
3  
4  
5  
6  
7  
8  
9  
10  
11  
12  
13  
14  
15  
16  
17  
18  
19  
20  
21  
22  
23  
24  
25  
26  
27  
28  
29  
30  
31  
32  
33  
34  
35  
36  
37  
38  
39  
40  
41  
42  
43  
44  
45  
46

case and control groups in body surface sensations and biophysical properties, including body surface temperature, mechanical pain threshold, PPT, and skin resistance. Parametric statistical testing (t-test) will be used for data that are normally distributed; otherwise, non-parametric statistical testing (Wilcoxon's signed rank test) will be used. If there is a difference between the case and control groups in body surface temperature, mechanical pain threshold, PPT, or skin resistance, the cut-off values for these indexes to distinguish between sensitive and non-sensitive states (including heat-sensitivity, pain-sensitivity, and electrical-sensitivity) will be detected using receiver operating characteristic curve analyses. Finally, the acupoint sensitization rates of patients and healthy subjects will be calculated separately regarding the aspects of heat, pain, and electrical sensitivity to identify the most important form of sensitivity for all acupoints. Meanwhile, OR represents the ratio of acupoint sensitization of patients and healthy subjects. Therefore, this study

|                   |     |                                                                                                                                                                                                                                                                                                           |     |                                                                                                                                        |
|-------------------|-----|-----------------------------------------------------------------------------------------------------------------------------------------------------------------------------------------------------------------------------------------------------------------------------------------------------------|-----|----------------------------------------------------------------------------------------------------------------------------------------|
|                   |     |                                                                                                                                                                                                                                                                                                           |     | combines OR and sensitization rate of all acupoints to find out the optimal points in each sensitization.                              |
|                   |     | (b) Describe any methods used to examine subgroups and interactions                                                                                                                                                                                                                                       | N/A |                                                                                                                                        |
|                   |     | (c) Explain how missing data were addressed                                                                                                                                                                                                                                                               | 10  | Missing data will be processed without imputation.                                                                                     |
|                   |     | (d) <i>Cohort study</i> —If applicable, explain how loss to follow-up was addressed<br><i>Case-control study</i> —If applicable, explain how matching of cases and controls was addressed<br><i>Cross-sectional study</i> —If applicable, describe analytical methods taking account of sampling strategy | 5,6 | Healthy subjects without neck or shoulder pain will comprise age- and sex-matched residents from the same communities as the patients. |
|                   |     | (e) Describe any sensitivity analyses                                                                                                                                                                                                                                                                     | N/A |                                                                                                                                        |
| <b>Results</b>    |     |                                                                                                                                                                                                                                                                                                           |     |                                                                                                                                        |
| Participants      | 13* | (a) Report numbers of individuals at each stage of study—eg numbers potentially eligible, examined for eligibility, confirmed eligible, included in the study, completing follow-up, and analysed                                                                                                         | N/A |                                                                                                                                        |
|                   |     | (b) Give reasons for non-participation at each stage                                                                                                                                                                                                                                                      | N/A |                                                                                                                                        |
|                   |     | (c) Consider use of a flow diagram                                                                                                                                                                                                                                                                        | N/A |                                                                                                                                        |
| Descriptive data  | 14* | (a) Give characteristics of study participants (eg demographic, clinical, social) and information on exposures and potential confounders                                                                                                                                                                  | N/A |                                                                                                                                        |
|                   |     | (b) Indicate number of participants with missing data for each variable of interest                                                                                                                                                                                                                       | N/A |                                                                                                                                        |
|                   |     | (c) <i>Cohort study</i> —Summarise follow-up time (eg, average and total amount)                                                                                                                                                                                                                          | N/A |                                                                                                                                        |
| Outcome data      | 15* | <i>Cohort study</i> —Report numbers of outcome events or summary measures over time                                                                                                                                                                                                                       | N/A |                                                                                                                                        |
|                   |     | <i>Case-control study</i> —Report numbers in each exposure category, or summary measures of exposure                                                                                                                                                                                                      | N/A |                                                                                                                                        |
|                   |     | <i>Cross-sectional study</i> —Report numbers of outcome events or summary measures                                                                                                                                                                                                                        | N/A |                                                                                                                                        |
| Main results      | 16  | (a) Give unadjusted estimates and, if applicable, confounder-adjusted estimates and their precision (eg, 95% confidence interval). Make clear which confounders were adjusted for and why they were included                                                                                              | N/A |                                                                                                                                        |
|                   |     | (b) Report category boundaries when continuous variables were categorized                                                                                                                                                                                                                                 | N/A |                                                                                                                                        |
|                   |     | (c) If relevant, consider translating estimates of relative risk into absolute risk for a meaningful time period                                                                                                                                                                                          | N/A |                                                                                                                                        |
| Other analyses    | 17  | Report other analyses done—eg analyses of subgroups and interactions, and sensitivity analyses                                                                                                                                                                                                            | N/A |                                                                                                                                        |
| <b>Discussion</b> |     |                                                                                                                                                                                                                                                                                                           |     |                                                                                                                                        |

|    |                          |    |                                                                                                                                                                            |        |
|----|--------------------------|----|----------------------------------------------------------------------------------------------------------------------------------------------------------------------------|--------|
| 1  |                          |    |                                                                                                                                                                            |        |
| 2  | Key results              | 18 | Summarise key results with reference to study objectives                                                                                                                   | N/A    |
| 3  |                          |    |                                                                                                                                                                            |        |
| 4  | Limitations              | 19 | Discuss limitations of the study, taking into account sources of potential bias or imprecision. Discuss both direction and magnitude of any potential bias                 | 11, 12 |
| 5  |                          |    |                                                                                                                                                                            |        |
| 6  |                          |    |                                                                                                                                                                            |        |
| 7  |                          |    |                                                                                                                                                                            |        |
| 8  |                          |    |                                                                                                                                                                            |        |
| 9  |                          |    |                                                                                                                                                                            |        |
| 10 |                          |    |                                                                                                                                                                            |        |
| 11 |                          |    |                                                                                                                                                                            |        |
| 12 |                          |    |                                                                                                                                                                            |        |
| 13 |                          |    |                                                                                                                                                                            |        |
| 14 |                          |    |                                                                                                                                                                            |        |
| 15 |                          |    |                                                                                                                                                                            |        |
| 16 |                          |    |                                                                                                                                                                            |        |
| 17 |                          |    |                                                                                                                                                                            |        |
| 18 |                          |    |                                                                                                                                                                            |        |
| 19 |                          |    |                                                                                                                                                                            |        |
| 20 |                          |    |                                                                                                                                                                            |        |
| 21 |                          |    |                                                                                                                                                                            |        |
| 22 | Interpretation           | 20 | Give a cautious overall interpretation of results considering objectives, limitations, multiplicity of analyses, results from similar studies, and other relevant evidence | N/A    |
| 23 |                          |    |                                                                                                                                                                            |        |
| 24 |                          |    |                                                                                                                                                                            |        |
| 25 | Generalisability         | 21 | Discuss the generalisability (external validity) of the study results                                                                                                      | 3      |
| 26 |                          |    |                                                                                                                                                                            |        |
| 27 |                          |    |                                                                                                                                                                            |        |
| 28 |                          |    |                                                                                                                                                                            |        |
| 29 |                          |    |                                                                                                                                                                            |        |
| 30 |                          |    |                                                                                                                                                                            |        |
| 31 |                          |    |                                                                                                                                                                            |        |
| 32 |                          |    |                                                                                                                                                                            |        |
| 33 |                          |    |                                                                                                                                                                            |        |
| 34 |                          |    |                                                                                                                                                                            |        |
| 35 |                          |    |                                                                                                                                                                            |        |
| 36 |                          |    |                                                                                                                                                                            |        |
| 37 |                          |    |                                                                                                                                                                            |        |
| 38 | <b>Other information</b> |    |                                                                                                                                                                            |        |
| 39 | Funding                  | 22 | Give the source of funding and the role of the funders for the present study and, if applicable, for the original study on which the present article is based              | 12     |
| 40 |                          |    |                                                                                                                                                                            |        |
| 41 |                          |    |                                                                                                                                                                            |        |
| 42 |                          |    |                                                                                                                                                                            |        |
| 43 |                          |    |                                                                                                                                                                            |        |
| 44 |                          |    |                                                                                                                                                                            |        |
| 45 |                          |    |                                                                                                                                                                            |        |
| 46 |                          |    |                                                                                                                                                                            |        |

Science Foundation of China (no. 81590950, 81590951, 81722050).

\*Give information separately for cases and controls in case-control studies and, if applicable, for exposed and unexposed groups in cohort and cross-sectional studies.

**Note:** An Explanation and Elaboration article discusses each checklist item and gives methodological background and published examples of transparent reporting. The STROBE checklist is best used in conjunction with this article (freely available on the Web sites of PLoS Medicine at <http://www.plosmedicine.org/>, Annals of Internal Medicine at <http://www.annals.org/>, and Epidemiology at <http://www.epidem.com/>). Information on the STROBE Initiative is available at [www.strobe-statement.org](http://www.strobe-statement.org).

For peer review only



# BMJ Open

## Identification of the optimal points for the acupuncture treatment of neck pain in China: protocol for a multicenter, matched, case-control study

|                                 |                                                                                                                                                                                                                                                                                                                                                                                                                                                                                                                                                                                                                                                                                                                                                                                                                                                                                                                                                                                                                                                                                                                                                       |
|---------------------------------|-------------------------------------------------------------------------------------------------------------------------------------------------------------------------------------------------------------------------------------------------------------------------------------------------------------------------------------------------------------------------------------------------------------------------------------------------------------------------------------------------------------------------------------------------------------------------------------------------------------------------------------------------------------------------------------------------------------------------------------------------------------------------------------------------------------------------------------------------------------------------------------------------------------------------------------------------------------------------------------------------------------------------------------------------------------------------------------------------------------------------------------------------------|
| Journal:                        | <i>BMJ Open</i>                                                                                                                                                                                                                                                                                                                                                                                                                                                                                                                                                                                                                                                                                                                                                                                                                                                                                                                                                                                                                                                                                                                                       |
| Manuscript ID                   | bmjopen-2019-029194.R2                                                                                                                                                                                                                                                                                                                                                                                                                                                                                                                                                                                                                                                                                                                                                                                                                                                                                                                                                                                                                                                                                                                                |
| Article Type:                   | Protocol                                                                                                                                                                                                                                                                                                                                                                                                                                                                                                                                                                                                                                                                                                                                                                                                                                                                                                                                                                                                                                                                                                                                              |
| Date Submitted by the Author:   | 16-May-2019                                                                                                                                                                                                                                                                                                                                                                                                                                                                                                                                                                                                                                                                                                                                                                                                                                                                                                                                                                                                                                                                                                                                           |
| Complete List of Authors:       | Sun, Mingsheng; Chengdu University of Traditional Chinese Medicine, College of Acupuncture and Tuina<br>Tao, Siyuan; Sichuan University, West China School of Public Health<br>Geng, Guoyan; Chengdu University of Traditional Chinese Medicine, College of Acupuncture and Tuina<br>Peng, Jieru; Sichuan University, West China School of Public Health<br>Ma, Xingsha; Chengdu University of Traditional Chinese Medicine, College of Acupuncture and Tuina<br>Yan, Mingxi; Chengdu University of Traditional Chinese Medicine, College of Acupuncture and Tuina<br>Chen, Jiao; Chengdu University of Traditional Chinese Medicine, College of Acupuncture and Tuina<br>Cai, Dingjun; Chengdu University of Traditional Chinese Medicine, College of Acupuncture and Tuina<br>Zheng, Hui ; Chengdu University of Traditional Chinese Medicine, College of Acupuncture and Tuina<br>Yang, Chunxia; Sichuan University, West China School of Public Health<br>Zhao, Ling; Chengdu University of Traditional Chinese Medicine, College of Acupuncture and Moxibustion and Tuina<br>Liang, Fan-rong; Chengdu University of Traditional Chinese Medicine |
| <b>Primary Subject Heading</b>: | Complementary medicine                                                                                                                                                                                                                                                                                                                                                                                                                                                                                                                                                                                                                                                                                                                                                                                                                                                                                                                                                                                                                                                                                                                                |
| Secondary Subject Heading:      | Complementary medicine                                                                                                                                                                                                                                                                                                                                                                                                                                                                                                                                                                                                                                                                                                                                                                                                                                                                                                                                                                                                                                                                                                                                |
| Keywords:                       | sensitized points, neck pain, study protocol, observational study                                                                                                                                                                                                                                                                                                                                                                                                                                                                                                                                                                                                                                                                                                                                                                                                                                                                                                                                                                                                                                                                                     |
|                                 |                                                                                                                                                                                                                                                                                                                                                                                                                                                                                                                                                                                                                                                                                                                                                                                                                                                                                                                                                                                                                                                                                                                                                       |

SCHOLARONE™  
Manuscripts

1  
2  
3  
4 **Identification of the optimal points for the acupuncture treatment of neck pain**  
5 **in China: protocol for a multicenter, matched, case-control study**

6  
7 Ming-Sheng Sun<sup>1†</sup>, Si-Yuan Tao<sup>2†</sup>, Guo-Yan Geng<sup>1†</sup>, Jie-Ru Peng<sup>2</sup>, Xing-Sha Ma<sup>1</sup>, Ming-Xi Yan<sup>1</sup>,  
8  
9 Jiao Chen<sup>1</sup>, Ding-Jun Cai<sup>1</sup>, Hui Zheng<sup>1</sup>, Chun Xia Yang<sup>2</sup>, Ling Zhao<sup>1\*</sup>, Fan-Rong Liang<sup>1\*</sup>  
10  
11

12  
13 † Ming-Sheng Sun, Si-Yuan Tao, and Guo-Yan Geng contributed equally to this work.  
14  
15

16  
17 <sup>1</sup> College of Acupuncture and Tuina, Chengdu University of Traditional Chinese Medicine,  
18  
19 Chengdu, 610075, China  
20

21 <sup>2</sup> West China School of Public Health, Sichuan University, Chengdu, 610041, China  
22  
23

24  
25 **\*Corresponding authors**

26  
27 Professor Ling Zhao

28  
29 Postal address: 37 Shierqiao Road, Chengdu, Sichuan, China

30  
31 Telephone: +86 13568801429

32  
33 Email: [zhaoling@cdutcm.edu.cn](mailto:zhaoling@cdutcm.edu.cn)  
34  
35

36  
37 Professor Fan-Rong Liang

38  
39 Postal address: 37 Shierqiao Road, Chengdu, Sichuan, China

40  
41 Telephone: +86 13608058216

42  
43 Email: [acuresearch@126.com](mailto:acuresearch@126.com)  
44  
45

46  
47 **Word count:** 2780 words  
48  
49

50  
51 **Keywords:** sensitized points, neck pain, study protocol, observational study  
52  
53  
54  
55  
56  
57  
58  
59  
60

## ABSTRACT

**Introduction:** Neck pain (NP) is a common condition that can be effectively treated by acupuncture. However, various treatment points prescription (such as local acupoints, distal acupoints, and sensitized acupoints) could be used. The present study aims to identify the types of sensitization and distribution of sensitized points in patients with NP, to analyze the cutoff values and sensitization rate for acupoint sensitization in patients, and to summarize the dominant forms of optimal sensitized points in patients. This information will be helpful in the choice of optimal points for the treatment of NP.

**Methods and analysis:** This multicenter, matched, case-control study will enroll 224 patients with NP, and 224 age- and sex-matched healthy subjects for control. Body surface temperature, mechanical pain threshold, pressure pain threshold, and skin resistance will be assessed at the 15 acupoints most frequently used to treat NP, and at the five body regions in which pain most frequently occurs. Hypothesis testing will be used to compare the differences in variables between cases and controls. In addition, receiver operating characteristic curve analysis will be used to explore the cutoff values of the sensitive states of heat, pain, and electrical resistance that indicate sensitization of the acupoint. The optimal points will be comprehensively determined by the acupoint sensitization rate and odds ratio (OR) value.

**Ethics and dissemination:** Ethical approval of this study has been granted by the Research Ethical Committee of the Teaching Hospital of Chengdu University of Traditional Chinese Medicine (ID: 2018KL-016). The outcomes of the study will be disseminated through peer-reviewed publications.

**Trial registration:** ChiCTR1800016220.

### Strengths and limitations of this study

- ▶ This study will be the first observational study to evaluate the forms of sensitization and the distribution of sensitized points in patients with NP.
- ▶ This study will be the first to attempt to define the acupoint sensitization in patients with NP using a cutoff value for the identification of point sensitization.
- ▶ As only patients with nontraumatic NP with mobility deficits were included, it would limit the representativeness and generalizability of the study results.

## INTRODUCTION

Neck pain (NP) is a common clinical condition often accompanied by tenderness at sensitive points. The global lifetime prevalence of NP was 48.5% in 2006.[1] The prevalence of white-collar workers in China was 33.9-54.8% in 2016 and has an increase tendency in recent years,[2] imposing considerable personal and socioeconomic burdens. Muscle relaxants and non-steroidal anti-inflammatory drugs are used to treat this disease, however, such medications carry a risk of adverse effects, and neither drug is better than non-pharmacological alternative treatments.[1]

As non-pharmacological alternative treatments have reliable efficacy and availability, this type of treatment is gaining an increasing amount of recognition worldwide. Acupuncture is one type of non-pharmacological alternative treatment that can effectively treat NP. Although various studies have confirmed that acupuncture is effective, the outcome of acupuncture treatment is closely related to the point selections.[3] Previous studies have evaluated the use of local acupoints[4] or distal acupoints,[5] with all types of treatment points reportedly having a certain degree of clinical efficacy.

Recent Chinese research has found that acupoints can be sensitized, with associated changes in function and size, and thus can functionally switch from a relatively 'silent' state to a relatively 'active' state. Treatment of an acupoint while it is in the 'active' state is thought to achieve a better clinical outcome, and this has become a focus in acupoint research.[6-8] There are diverse types of sensitivity manifested at sensitized points, including pain-sensitivity, heat-sensitivity, and form-sensitivity (appearance changes). Recent clinical studies report that a superior outcome is obtained using acupuncture at pain-sensitive points,[9] and moxibustion at heat-sensitive points[10] or visual-sensitive points.[11] However, most of the current observational studies have only focused on one form of sensitization in a small sample population, and thus are not comprehensive studies of various forms of sensitization.[6 10] The choice of optimal treatment points for NP in clinical practice is still controversial.

Herein, we describe the protocol for an observational study that aims to identify the different types of sensitization (e.g. temperature, tenderness) and the distribution of sensitized acupoints in patients with NP, to analyze the cutoff values for acupoint sensitization in patients with NP, and to determine the most optimal sensitization types seen at sensitized points in patients with NP. We believe that in the state of disease, the sensitive points occurs with high frequency (manifested as changes in

1  
2  
3  
4 temperature, pain threshold etc), and the sensitive points of different sensitizations will overlap, and  
5  
6 the final optimal points from overlap may be closely related to the selection of clinical treatment  
7  
8 points. Previous small sample studies have confirmed the feasibility of sensitization testing.[7] The  
9  
10 present study will provide evidence for the selection of the optimal treatment points for NP in  
11  
12 clinical practice.

## 13 14 15 **METHODS AND ANALYSIS**

### 16 17 **Study design**

18  
19 This is a multicenter, age- and sex-matched, case-control study. The protocol was developed in  
20  
21 accordance with the Strengthening the Reporting of Observational Studies in Epidemiology  
22  
23 guidelines.[12] The study has been registered with ChiCTR at Current Controlled Trials  
24  
25 (ChiCTR1800016203). A flowchart of the study design is shown in Figure 1.

### 26 27 28 29 **Ethics**

30  
31 This study was designed in accordance with the principles of the Declaration of Helsinki. The study  
32  
33 protocol has been approved by the Ethics Committee of the First Affiliated Hospital of Chengdu  
34  
35 University of Traditional Chinese Medicine (approval number: 2018KL-016), and is registered on  
36  
37 the primary registry in the World Health Organization registry network (Chinese Clinical Trial  
38  
39 Registry: no. ChiCTR1800016203). Signed consent will be obtained from each participant after  
40  
41 they have been informed of the study procedures, possible risks, and their right to withdraw from  
42  
43 the study.

### 44 45 46 **Patients and healthy subjects**

#### 47 48 **Inclusion criteria**

49  
50 Patients are eligible for study inclusion if they: (1) have nontraumatic NP with mobility deficits in  
51  
52 the acute and chronic stages (2) are males or females aged 18–60 years; (3) provide written informed  
53  
54 consent for all procedures in this study.

55  
56  
57  
58 Healthy subjects are eligible if they: (1) have no history of NP and/or restricted neck movement; (2)  
59  
60 are males or females aged 18–60 years; (3) provide written informed consent for all procedures in

1  
2  
3  
4 this study.  
5  
6  
7

### 8 **Exclusion criteria**

9 Patients are not eligible if they: (1) have complicated neck or shoulder pain caused by cervical and  
10 intervertebral disc degeneration, such as other types of cervical spondylosis, shoulder periartthritis,  
11 rheumatic myofibrillar inflammation; (2) have history of neck fracture or surgery, or cervical  
12 congenital abnormality; (3) have serious disease related to the heart, liver, kidney, or hematopoietic  
13 system; (4) have difficulty in answering the questionnaires because of cognitive impairment; (5)  
14 have dermatopathic diseases; (6) are pregnant, breastfeeding, or planning a pregnancy during the  
15 study period.  
16  
17  
18  
19  
20  
21  
22

23  
24  
25 Healthy subjects are not eligible if they: (1) have serious disease related to the heart, liver, kidney,  
26 or hematopoietic system; (2) have cervical congenital abnormality; (3) have difficulty in answering  
27 the questionnaires because of cognitive impairment; (4) have dermatopathic diseases; (5) are  
28 pregnant, breastfeeding, or planning a pregnancy during the study period.  
29  
30  
31  
32  
33  
34

### 35 **Recruitment strategies**

36 We will recruit patients from the outpatient departments of Acupuncture and Moxibustion, and  
37 Orthopedics in five clinical centers in China: Chengdu University of Traditional Chinese Medicine,  
38 Hunan University of Traditional Chinese Medicine, Shaanxi University of Traditional Chinese  
39 Medicine, Shanxi University of Traditional Chinese Medicine, and Guiyang College of Traditional  
40 Chinese Medicine. Healthy subjects without neck or shoulder pain will comprise age- and sex-  
41 matched residents from the same communities as the patients. Recruitment strategies will include  
42 posting advertisements on social media (such as WeChat, which is similar to Facebook) and at  
43 community centers, or by word-of-mouth introductions through subjects already enrolled in the  
44 study. Patients or healthy subjects who consent to study participation will be examined and  
45 diagnosed by a hospital doctor.  
46  
47  
48  
49  
50  
51  
52  
53  
54  
55  
56  
57

### 58 **Test regions, acupoints, and sensitized points**

59 In accordance with the results of literature data-mining and expert consensus on the treatment of  
60

NP, we identified the 15 most frequently used acupoints (Table 1) and the five regions of the body with the most frequent occurrence of pain and the greatest degree of acupoint sensitization. The body was divided into five regions to standardize the treatment procedures and detection areas. Regions 1 and 2 are each bordered by the respective ipsilateral mastoid, sternal end of the clavicle, anterior axillary line, acromion, and C7 spinous process. Region 3 is the triangular region bordered by both sides of the mastoid and the C7 spinous process. Regions 4 and 5 are each bordered by the respective ipsilateral C7 spinous process, acromion, and axillary line; the two regions are divided by the posterior midline. These regions are the same as those used in previous studies on NP,[13] and include the upper trapezius, splenius capitis muscles, sternocleidomastoid, levator scapulae, infraspinatus, scalene, subscapularis muscles, and other neck muscles associated with NP.[14 15] These regions and acupoints are shown in Figure 2.

Investigators will mark the 29 acupoints on each patient. All investigators will attend training to make sure all practices are standardized. And the investigator was not told whether the subject was a patient or a healthy controls. The investigator will then palpate the detection area associated with each acupoint using the appropriate force (< 2,000 gf), and will identify the sensitized points that have pain/sourness/heaviness/fullness or nodules.

**Table 1** Acupoints selected for use in the study

| Acupoints           | Location                                                                                                                                             |
|---------------------|------------------------------------------------------------------------------------------------------------------------------------------------------|
| Jianjing (GB-21)    | On the shoulder, directly above the nipple, at the midpoint of the line connecting Dazhui(DU-14) with the acromial end of clavicle                   |
| Jianzhongshu(SI-15) | On the back, 2 cun lateral to the lower border of the spinous process of the 7 <sup>th</sup> cervical vertebra                                       |
| Wangu(GB-12)        | On the head, in the depression posterior and inferior to the mastoid process.                                                                        |
| Fengchi(GB-20)      | On the nape, below the occipital, on a level with Fengfu DU-16, in the depression between the upper portion of trapezius and the sternocleidomastoid |
| Tianzhu(BL-10)      | On the nape, 1.3 cun lateral to the posterior hairline, in the depression of the posterior hairline lateral to the trapezius muscle                  |
| Dazhui(DU-14)       | On the posterior median line, in the depression below the spinous process of the 7 <sup>th</sup> cervical vertebra                                   |
| Dazhu(BL-11)        | On the back, 1.5 cun lateral to the lower border of the spinous process of the 1 <sup>st</sup> thoracic vertebra                                     |
| Jianwaishu(SI-14)   | On the back, 3 cun lateral to the lower border of the spinous process of the first thoracic vertebra                                                 |

|    |                  |                                                                                              |
|----|------------------|----------------------------------------------------------------------------------------------|
| 1  |                  |                                                                                              |
| 2  |                  |                                                                                              |
| 3  | Tianliao(SJ-15)  | On the region of scapula, at the midpoint of the line connecting Jianjing                    |
| 4  |                  | GB-21 with Quyuan SI-13, on the superior angle of the scapula                                |
| 5  |                  |                                                                                              |
| 6  | Jugu(LI-16)      | In the upper portion of the shoulder, in the depression between the                          |
| 7  |                  | acromial end of clavicle and the scapular spine                                              |
| 8  |                  |                                                                                              |
| 9  | Tianzong(SI-11)  | In the region of the scapula, in the depression of the center of the                         |
| 10 |                  | subscapular fossa, on a level with the 4 <sup>th</sup> thoracic vertebra                     |
| 11 | Shousanli(LI-10) | Flexing the elbow, on the dorsal radial side of the forearm, on the line                     |
| 12 |                  | connecting Yangxi LI-5 with Quchi LI-11, 2cun below the transverse                           |
| 13 |                  | cuticular crease                                                                             |
| 14 |                  |                                                                                              |
| 15 | Lieque(LU-7)     | On the radial margin of the forearm, 1.5 cun above the transverse crease                     |
| 16 |                  | of the wrist, between the branchioradial muscle and the long abductor                        |
| 17 |                  | muscle tendon of thumb                                                                       |
| 18 |                  |                                                                                              |
| 19 | Zhongzhu(SJ-3)   | On the dorsum of the hand, in the depression between the 4 <sup>th</sup> and 5 <sup>th</sup> |
| 20 |                  | metacarpal bones, proximal to the 4 <sup>th</sup> metacarpalangeal joint                     |
| 21 |                  |                                                                                              |
| 22 | Houxi(SI-3)      | On the ulna side of the palm, proximate to the fifth metacarpophalangeal                     |
| 23 |                  | joint, at the end of transverse crease of metacarpophalangeal joint, at the                  |
| 24 |                  | dorsoventral boundary                                                                        |
| 25 | <hr/>            |                                                                                              |

### Outcome measurements

All data collection for each patient will be completed on the same day.

### Body surface temperature

Thermal imaging technology has been widely applied to assess pain and muscle damage.[16 17] Each participant will be evaluated in a room with a constant temperature of 26°C. Investigators will use Fotric thermal imaging cameras (Fotric 226, IRS Systems Inc., Allen, TX, USA) to make measurements at each of the 29 acupoints in the five body regions. The temperature data of each point on the images will be analyzed using professional software (AnalyzeIR, IRS Systems Inc., Allen, TX, USA).

### Mechanical pain threshold

Investigators will use the electronic Von Frey esthesiometer (type 2390, IITC Life Science, Woodland Hills, CA, USA) to make two measurements of the mechanical pain threshold at each of the 29 acupoints in the five body regions in turn. Previous studies have found that the device can detect hyperalgesia and changes in sensory nerve function.[18-20] Mechanical pain caused by punctate stimuli is related to A<sub>δ</sub>-fibers.[21] If there is a difference of more than 15 g between the two measurements of mechanical pain threshold made at one acupoint, the mechanical pain



1  
2  
3  
4 threshold at that acupoint will be measured a third time. Progressive pressure will be applied at a  
5  
6 rate of 10 g/s at each acupoint. The average mechanical pain threshold will be calculated for each  
7  
8 acupoint. To reduce the consecutive assessment error for two adjacent points, a method of alternate  
9  
10 assessment of acupoints on the left and right sides of the body will be adopted.

### 11 12 13 **Pressure pain threshold**

14  
15 The pressure pain threshold (PPT) is widely used in clinical practice as a semi-objective method  
16  
17 with which to quantify localized pain.[22 23] Pain caused by blunt pressure stimuli is related to C-  
18  
19 fibers.[21] Investigators will use the FDIX Force Gauge (Force One™ FDIX, Wagner Instruments,  
20  
21 Greenwich, CT, USA) to make two measurements of the PPT at each of the 29 acupoints in the five  
22  
23 body regions in turn. If there is a difference of more than 500 gf between the two PPT measurements  
24  
25 performed at one acupoint, the PPT at that acupoint will be measured a third time. Progressive  
26  
27 pressure will be applied at a rate of 100 gf/s at each acupoint. The average PPT will be calculated  
28  
29 for each acupoint. A method of alternate assessment of the acupoints on the left and right sides of  
30  
31 the body will again be adopted.

### 32 33 34 **Skin resistance**

35  
36 Investigators will use the Acupoint dynamics research instrument (LMR30-RⅢ, Peking  
37  
38 University, Beijing, China) to record the skin resistance at nine acupoints (GB-21, GB-20, BL-11,  
39  
40 LI-10, SI-3; bilateral) and at the two most sensitive points (if there are two sensitive points).

### 41 42 43 **Pain**

44  
45 NP will be measured using the Visual Analogue Scale, the Northwick Park Neck Pain Questionnaire,  
46  
47 and the McGill Pain Questionnaire. The Visual Analogue Scale will be used to measure the severity  
48  
49 of pain. The Northwick Park Neck Pain Questionnaire provides a reliable outcome measure for  
50  
51 patients with NP, while the McGill Pain Questionnaire is used to measure the different qualities of  
52  
53 the subjective pain experience; these questionnaires have been proven valid, and are convenient for  
54  
55 patients to complete.[24 25]

### 56 57 58 59 60 **Neck function**

1  
2  
3  
4 The change in neck function will be evaluated by measuring the cervical range of motion.  
5  
6

### 7 **General demographic information**

8  
9 This will include the collection of data regarding age, disease duration, medical history, and  
10 medication type and dosage.  
11  
12  
13

### 14 **Safety and adverse events**

15  
16 Non-invasive assessments of the body surface do not generally cause adverse events. However, we  
17 will still record the number and type (e.g. serious pain, fainting) of adverse events in each group.  
18  
19 Participants who experience adverse events will receive the appropriate intervention. Adverse  
20 events will be immediately reported to the primary investigator and the ethics committee, and the  
21 affected participants will be withdrawn from the study.  
22  
23  
24  
25  
26  
27  
28

### 29 **Patients and public involvement**

30  
31 Patients and public were not involved.  
32  
33  
34

### 35 **Sample size calculation**

36  
37 Previous study indicated that the rate of acupoint sensitization in patients ranged from 20% to  
38 70%,<sup>[26]</sup> so we set this rate at 50% to calculate the minimum sample size required for the proposed  
39 study. With acupoint sensitization rate of 20% in healthy subjects, the odds ratio is 4. According to  
40 Chow's formula in comparing two sample proportion,<sup>[27]</sup> we assumed an  $\alpha$  level of 0.05, a  $\beta$  of  
41 0.01, thus, the smallest sample size is 408 with two-sided confidence and a ratio of control subjects  
42 to cases of 1 (TrialSize package in R software). Considering the potential non-response rate and  
43 sampling effectiveness as 10%, the final sample size is 448 (224 patients, plus 224 age- and sex-  
44 matched healthy subjects).  
45  
46  
47  
48  
49  
50  
51  
52  
53

### 54 **Statistical analysis**

55  
56 Data will be blinded, double-entered in EpiData 3.1 software, and adequately checked for errors. SPSS  
57 21.0 (SPSS Inc., Chicago, IL, USA) will then be used to complete the statistical analyses. The statistical  
58 data evaluation will be independently performed by the West China School of Public Health at Sichuan  
59  
60

1  
2  
3  
4 University, China. Missing data will be processed without imputation. First, the distribution of basic  
5 information in the case and control groups will be described, including age, sex, height, weight, job  
6 occupation, and education level. Data will be presented as means (SD) for continuous variables, and  
7 as frequency (percentage) for categorical variables. The distributions of sensitized points will be  
8 shown in scatter plots to represent the skin morphological changes. The distributions of the intensity  
9 of NP and neck function will also be described. Hypothetical testing will then be performed to assess  
10 the differences between the case and control groups in body surface sensations and biophysical  
11 properties, including body surface temperature, mechanical pain threshold, PPT, and skin resistance.  
12 Parametric statistical testing (t-test) will be used for data that are normally distributed; otherwise,  
13 non-parametric statistical testing (Wilcoxon's signed rank test) will be used. If there is a difference  
14 between the case and control groups in body surface temperature, mechanical pain threshold, PPT,  
15 or skin resistance, the cut-off values for these indexes to distinguish between sensitive and non-  
16 sensitive states (including heat-sensitivity, pain-sensitivity, and electrical-sensitivity) will be  
17 detected using receiver operating characteristic curve analyses. Finally, the acupoint sensitization  
18 rates of patients and healthy subjects will be calculated separately regarding the aspects of heat,  
19 pain, and electrical sensitivity to identify the most important form of sensitivity for all acupoints.  
20 Meanwhile, odds ratio (OR) represents the ratio of acupoint sensitization of patients and healthy  
21 subjects. Therefore, this study combines OR and sensitization rate of all acupoints to find out the  
22 optimal points in each sensitization.  
23  
24  
25  
26  
27  
28  
29  
30  
31  
32  
33  
34  
35  
36  
37  
38  
39  
40  
41  
42

### 43 **Quality control**

44 This is a multi-center observational study, and so quality control will play a vital role in the  
45 extrapolation of the conclusion. To ensure the integrity of the study and protect the rights and health  
46 of the participants, we will set up a Data and Safety Monitoring Board. The Data and Safety  
47 Monitoring Board will be developed in accordance with the Operational Guidelines for the  
48 Establishment and Functioning of the Data and Safety Monitoring Boards of the World Health  
49 Organization. Separate from the Data and Safety Monitoring Board, a quality control group will be  
50 established to guarantee the validity and reliability of results. Before study commencement,  
51 fieldwork operation manuals will be prepared, and pilot study participants from all centers will  
52 undergo training in accordance with the standard operating procedure of this study. Every 3 months,  
53  
54  
55  
56  
57  
58  
59  
60

1  
2  
3  
4 members of the quality control group will conduct a quality control review at each study site, and  
5  
6 produce a report regarding the quality analysis of the whole data collection process.  
7  
8

## 9 **DISCUSSION**

10 NP is the third-most common chronic pain condition, and the fourth leading cause of disability  
11 worldwide.[28] Acupuncture is a popular non-pharmacological modality used to relieve pain. The  
12 latest research has found that the performance of acupuncture at sensitive points may provide the  
13 most effective treatment.[8 29] When the body is in a diseased state, there will be morphological  
14 form-sensitive point changes, such as nodules, pimples, uplifting, dimpling, and changes in skin  
15 color.[30] Thermal image detection has proved that the temperature of corresponding acupoints will  
16 be obviously abnormal when a patient has visceral illness, such as diseases of the heart, lung, and  
17 stomach, which indicates that the temperature of acupoints can reflect the physiological and  
18 pathological phenomena of the affected organs.[31] Studies have confirmed that the PPT at  
19 acupoints changes when patients are in a diseased state.[6 32 33] The degree of change in the PPT  
20 may reflect the intensity of acupoint sensitization, and may be related to the disease status.[34] This  
21 proposed observational study will bridge the knowledge gap regarding the optimal sensitization of  
22 acupoints in various forms of point sensitivity in patients with NP.  
23  
24  
25  
26  
27  
28  
29  
30  
31  
32  
33  
34  
35

36 As this will be the first study to evaluate the association between acupoint sensitization and NP, this  
37 observational study may have some limitations. The main limitation is that in order to reduce the  
38 bias caused by other factors and to ensure consistency, this study will only include patients with  
39 nontraumatic NP with mobility deficits, while excluding patients with other types of NP (such as  
40 NP with radiating pain or secondary NP). Furthermore, as the four participating centers are located  
41 in four different regions in China, it may be difficult to implement quality control; thus, quality  
42 control reviews will be conducted every 3 months.  
43  
44  
45  
46  
47  
48  
49

50 In conclusion, this article describes the design and protocol of a study that aims to observe the  
51 different types of sensitization (e.g. temperature, tenderness) and the distribution of sensitized  
52 acupoints in patients with NP, to analyze the cutoff values for acupoint sensitization in patients with  
53 NP, and to identify the dominant sensitized forms of the sensitized points in patients with NP. The  
54 results will provide a basis for the selection of clinically optimal acupuncture points for NP.  
55  
56  
57  
58  
59  
60

### **Acknowledgments**

We thank the staff of Chengdu CTC Tianfu Digital Technology Inc. for providing images. We acknowledge the help and contributions from the subjects, investigators, and experts in each center. We thank Kelly Zammit, BVSc, from Liwen Bianji, Edanz Editing China ([www.liwenbianji.cn/ac](http://www.liwenbianji.cn/ac)), for editing the English text of a draft of this manuscript.

### **Authors' contributions**

MSS, SYT, JRP, DJC, CXY, HZ, LZ, and FRL participated in the design of the trial, in creating the data analysis plan, and in drafting the manuscript. GYG, XSM, MXY, and JC collected the information needed for the performance of this trial in each center. All of the authors discussed, read, and revised the manuscript, and gave final approval for the publication of this study protocol.

### **Funding**

This work was financially supported by the National Natural Science Foundation of China (no. 81590950, 81590951, 81722050).

### **Competing interests**

The authors declare that they have no competing interests.

### **Ethics approval**

The study protocol has been approved by the institutional review board and ethics committee of the First Affiliated Hospital of Chengdu University of Traditional Chinese Medicine (May 2018).

### **Provenance and peer review**

Not commissioned; internally peer reviewed.

### **Open Access**

This is an Open Access article distributed in accordance with the Creative Commons Attribution Non Commercial (CCBY-NC 3.0) license, which permits others to distribute, remix, adapt, build upon this work noncommercially, and license their derivative works on different terms, provided

the original work is properly cited and the use is non-commercial. See: <http://creativecommons.org/licenses/by-nc/3.0/>

## REFERENCES

1. Fejer R, Kyvik KO, Hartvigsen J. The prevalence of neck pain in the world population: a systematic critical review of the literature. *European spine journal : official publication of the European Spine Society, the European Spinal Deformity Society, and the European Section of the Cervical Spine Research Society* 2006;**15**(6):834-48 doi: 10.1007/s00586-004-0864-4[published Online First: Epub Date]].
2. Guidelines for grading diagnosis and treatment of cervical spondylosis in Anhui Province, China (安徽省颈椎病分级诊疗指南). *Anhui Medical Journal* 2017;**38**(9)
3. White AR, Ernst E. A systematic review of randomized controlled trials of acupuncture for neck pain. *Rheumatology (Oxford, England)* 1999;**38**(2):143-7
4. Mejuto-Vazquez MJ, Salom-Moreno J, Ortega-Santiago R, et al. Short-term changes in neck pain, widespread pressure pain sensitivity, and cervical range of motion after the application of trigger point dry needling in patients with acute mechanical neck pain: a randomized clinical trial. *The Journal of orthopaedic and sports physical therapy* 2014;**44**(4):252-60 doi: 10.2519/jospt.2014.5108[published Online First: Epub Date]].
5. Irnich D, Behrens N, Gleditsch JM, et al. Immediate effects of dry needling and acupuncture at distant points in chronic neck pain: results of a randomized, double-blind, sham-controlled crossover trial. *Pain* 2002;**99**(1-2):83-9
6. Yan CQ, Zhang S, Li QQ, et al. Detection of peripheral and central sensitisation at acupoints in patients with unilateral shoulder pain in Beijing: a cross-sectional matched case-control study. *BMJ open* 2017;**7**(6):e014438 doi: 10.1136/bmjopen-2016-014438[published Online First: Epub Date]].
7. Luo YN, Zhou YM, Zhong X, et al. Observation of Pain-Sensitive Points in Patients with Knee Osteoarthritis: A Pilot Study. *European Journal of Integrative Medicine* 2018
8. Chen RX, Kang MF. Acupoint heat-sensitization and its clinical significance. *Journal of Traditional Chinese Medicine* 2006;**2001**(4):488-9
9. Yao ZL, Liu F, Song NC. 40 Cases of Neck Type of Cervical Spondylosis Treated by Acupotomy Based on the Theory of Trigger point(基于激痛点理论应用针刀治疗颈型颈椎病 40 例). *Zhongguo zhen jiu = Chinese acupuncture & moxibustion* 2016;**36**(11):1155-55
10. Zhang H, Xu N, Huang R, et al. Heat-Sensitive Moxibustion in Treatment of Cervical Spondylosis. *Liaoning Journal of Traditional Chinese Medicine* 2016(12):2631-34
11. Xiao L, Meng X, Du S, et al. Therapeutic Observation of Heavy-dose Moxibustion at Sha-petechiae for Neck-type Cervical Spondylosis Due to Cold Coagulation and Blood Stagnation. *Shanghai Journal of Acupuncture and Moxibustion* 2017(11):1336-39
12. von Elm E, Altman DG, Egger M, et al. Strengthening the Reporting of Observational Studies in Epidemiology (STROBE) statement: guidelines for reporting observational studies. *BMJ (Clinical research ed)* 2007;**335**(7624):806-8 doi: 10.1136/bmj.39335.541782.AD[published Online First: Epub Date]].
13. Croft PR, Lewis M, Papageorgiou AC, et al. Risk factors for neck pain: a longitudinal study in the

- 1  
2  
3 general population. *Pain* 2001;**93**(3):317-25
- 4  
5 14. Falla D, Lindstrøm R, Rechter L, et al. Effectiveness of an 8-week exercise programme on pain and  
6 specificity of neck muscle activity in patients with chronic neck pain: A randomized controlled  
7 study. *European Journal of Pain* 2013;**17**(10):1517-28
- 8  
9 15. Cagnie B, Castelein B, Pollie F, et al. Evidence for the Use of Ischemic Compression and Dry Needling  
10 in the Management of Trigger Points of the Upper Trapezius in Patients with Neck Pain: A  
11 Systematic Review. *American journal of physical medicine & rehabilitation* 2015;**94**(7):573-83  
12 doi: 10.1097/phm.000000000000266[published Online First: Epub Date] |.
- 13  
14 16. Ring EF, Ammer K. Infrared thermal imaging in medicine. *Physiological measurement*  
15 2012;**33**(3):R33-46 doi: 10.1088/0967-3334/33/3/r33[published Online First: Epub Date] |.
- 16  
17 17. Adamczyk JG, Krasowska I, Boguszewski D, et al. The use of thermal imaging to assess the  
18 effectiveness of ice massage and cold-water immersion as methods for supporting post-  
19 exercise recovery. *Journal of thermal biology* 2016;**60**:20-5 doi:  
20 10.1016/j.jtherbio.2016.05.006[published Online First: Epub Date] |.
- 21  
22 18. Neto MLP, Maciel LYS, Cruz KML, et al. Does electrode placement influence tens-induced  
23 antihyperalgesia in experimental inflammatory pain model? *Brazilian journal of physical*  
24 *therapy* 2017;**21**(2):92-99 doi: 10.1016/j.bjpt.2017.03.003[published Online First: Epub Date] |.
- 25  
26 19. Yamamoto S, Ono H, Kume K, et al. Oxaliplatin treatment changes the function of sensory nerves in  
27 rats. *Journal of pharmacological sciences* 2016;**130**(4):189-93 doi:  
28 10.1016/j.jpshs.2015.12.004[published Online First: Epub Date] |.
- 29  
30 20. Chen Y, Yao Y, Wu Y, et al. Transcutaneous electric acupoint stimulation alleviates remifentanyl-  
31 induced hyperalgesia in patients undergoing thyroidectomy: a randomized controlled trial.  
32 *International journal of clinical and experimental medicine* 2015;**8**(4):5781-7
- 33  
34 21. Beissner F, Brandau A, Henke C, et al. Quick discrimination of A(delta) and C fiber mediated pain  
35 based on three verbal descriptors. *PloS one* 2010;**5**(9):e12944 doi:  
36 10.1371/journal.pone.0012944[published Online First: Epub Date] |.
- 37  
38 22. Persson AL, Brogårdh C, Sjölund BH. Tender or not tender: test-retest repeatability of pressure pain  
39 thresholds in the trapezius and deltoid muscles of healthy women. *Journal of rehabilitation*  
40 *medicine* 2004;**36**(1):17
- 41  
42 23. Fischer AA. Pressure algometry over normal muscles. Standard values, validity and reproducibility  
43 of pressure threshold. *Pain* 1987;**30**(1):115-26
- 44  
45 24. Chiu TT, Lam TH, Hedley AJ. Subjective health measure used on Chinese patients with neck pain in  
46 Hong Kong. *Spine* 2001;**26**(17):1884-9
- 47  
48 25. Burckhardt CS, Jones KD. Adult measures of pain: The McGill Pain Questionnaire (MPQ),  
49 Rheumatoid Arthritis Pain Scale (RAPS), Short - Form McGill Pain Questionnaire (SF - MPQ),  
50 Verbal Descriptive Scale (VDS), Visual Analog Scale (VAS), and West Haven - Yale  
51 Multidisciplinary Pain. *Arthritis Care & Research* 2010;**49**(S5):0-0
- 52  
53 26. Chen R, Kang M. Acupoint Heat-Sensitization and Its Clinical Significance. *Journal of Traditional*  
54 *Chinese Medicine* 2006;**2001**(4):488-9
- 55  
56 27. Chow SC, Shao J, Wang H. *Sample size calculations in clinical research*. New York: Marcel Dekker,  
57 2003.
- 58  
59 28. Hoy D, March L, Woolf A, et al. The global burden of neck pain: estimates from the global burden of  
60 disease 2010 study. *Annals of the rheumatic diseases* 2014;**73**(6):968
29. Zhang S, Wang W, Zou L, et al. [Acupoints heat-sensitive moxibustion in the application of traditional

- 1  
2  
3 Chinese surgery]. Zhongguo zhen jiu = Chinese acupuncture & moxibustion 2016;**36**(1):109-12  
4  
5 30. Zhou S, Yin H, Huai M. Progress and Prospect of the Study on the Correlation Mechanism of Surface  
6 and Visceral Phase. Acupuncture Research 1982(02)  
7  
8 31. Shui YL, Institute QH, Pasadena. Infrared imaging system as a versatile diagnostic and auxiliary  
9 treatment tool in Chinese Medicine.  
10  
11 32. Chen S, Miao Y, Nan Y, et al. The Study of Dynamic Characteristic of Acupoints Based on the Primary  
12 Dysmenorrhea Patients with the Tenderness Reflection on Dijì (SP 8). Evidence-Based  
13 Complementray and Alternative Medicine,2015,(2015-6-16) 2015;**2015**:158012  
14  
15 33. Chae Y, Kim HY, Lee HJ, et al. The alteration of pain sensitivity at disease-specific acupuncture points  
16 in premenstrual syndrome. Journal of Physiological Sciences 2007;**57**(2):115-19  
17  
18 34. Tunks E, Crook J, Norman G, et al. Tender points in fibromyalgia. Pain 1988;**34**(1):11  
19  
20  
21

22 **Figure 1** Flowchart of the study design.  
23  
24

25 **Figure 2** The test regions and acupoints that will be used in the study.  
26  
27  
28  
29  
30  
31  
32  
33  
34  
35  
36  
37  
38  
39  
40  
41  
42  
43  
44  
45  
46  
47  
48  
49  
50  
51  
52  
53  
54  
55  
56  
57  
58  
59  
60





45 Flowchart of the study design.

46 53x89mm (600 x 600 DPI)

1  
2  
3  
4  
5  
6  
7  
8  
9  
10  
11  
12  
13  
14  
15  
16  
17  
18  
19  
20  
21  
22  
23  
24  
25  
26  
27  
28  
29  
30  
31  
32  
33  
34  
35  
36  
37  
38  
39  
40  
41  
42  
43  
44  
45  
46  
47  
48  
49  
50  
51  
52  
53  
54  
55  
56  
57  
58  
59  
60



The test regions and acupoints that will be used in the study.

90x71mm (600 x 600 DPI)

## STROBE Statement—checklist of items that should be included in reports of observational studies

|                           | Item No. | Recommendation                                                                                      | Page No. | Relevant text from manuscript                                                                                                                                                                                                                                                                                                                                                                                               |
|---------------------------|----------|-----------------------------------------------------------------------------------------------------|----------|-----------------------------------------------------------------------------------------------------------------------------------------------------------------------------------------------------------------------------------------------------------------------------------------------------------------------------------------------------------------------------------------------------------------------------|
| <b>Title and abstract</b> | 1        | (a) Indicate the study's design with a commonly used term in the title or the abstract              | 1        | a multicenter, matched, case-control study                                                                                                                                                                                                                                                                                                                                                                                  |
|                           |          | (b) Provide in the abstract an informative and balanced summary of what was done and what was found | 2        | The present study aims to identify the types of sensitization (e.g. temperature, tenderness) and distribution of sensitized points in patients with NP, to analyze the cutoff values and sensitization rate for acupoint sensitization in patients, and to summarize the dominant forms of optimal sensitized points in patients. This information will be helpful in the choice of optimal points for the treatment of NP. |
| <b>Introduction</b>       |          |                                                                                                     |          |                                                                                                                                                                                                                                                                                                                                                                                                                             |
| Background/rationale      | 2        | Explain the scientific background and rationale for the investigation being reported                | 3        | Recent Chinese research has found that acupoints can be sensitized, with associated changes in function and size, and thus can functionally switch from a relatively 'silent' state to a relatively 'active' state. Treatment of an acupoint while it is in the 'active' state is thought to achieve a better clinical outcome, and this has become a focus in acupoint research.[6-8] There are                            |

1  
2  
3  
4  
5  
6  
7  
8  
9  
10  
11  
12  
13  
14  
15  
16  
17  
18  
19  
20  
21  
22  
23  
24  
25  
26  
27  
28  
29  
30  
31  
32  
33  
34  
35  
36  
37  
38  
39  
40  
41  
42  
43  
44  
45  
46

For peer review only

diverse types of sensitivity manifested at sensitized points, including pain-sensitivity, heat-sensitivity, and form-sensitivity (appearance changes). Recent clinical studies report that a superior outcome is obtained using acupuncture at pain-sensitive points,[9] and moxibustion at heat-sensitive points[10] or visual-sensitive points.[11] However, most of the current observational studies have only focused on one form of sensitization in a small sample population, and thus are not comprehensive studies of various forms of sensitization.[6 10] The choice of optimal treatment points for NP in clinical practice is still controversial.

Objectives                    3                    State specific objectives, including any prespecified hypotheses                    4

We describe the protocol for an observational study that aims to identify the different types of sensitization (e.g. temperature, tenderness) and the distribution of sensitized acupoints in patients with NP, to analyze the cutoff values for acupoint sensitization in patients with NP, and to determine the most optimal sensitization types seen at sensitized points in patients with NP. We believe that in the

state of disease, the sensitive points occurs with high frequency (manifested as changes in temperature, pain threshold etc), and the sensitive points of different sensitizations will overlap, and the final optimal points from overlap may be closely related to the selection of clinical treatment points. And the different sensations of point may suggest selection of interventions. Previous small sample studies have confirmed the feasibility of sensitization testing.[7] The present study will provide a basis for the selection of the optimal treatment points for NP in clinical practice.

---

## Methods

|              |   |                                                                                                                                 |     |                                                                                                                                                                                                     |
|--------------|---|---------------------------------------------------------------------------------------------------------------------------------|-----|-----------------------------------------------------------------------------------------------------------------------------------------------------------------------------------------------------|
| Study design | 4 | Present key elements of study design early in the paper                                                                         | 4   | This is a multicenter, age- and sex-matched, case-control study. The protocol was developed in accordance with the Strengthening the Reporting of Observational Studies in Epidemiology guidelines. |
| Setting      | 5 | Describe the setting, locations, and relevant dates, including periods of recruitment, exposure, follow-up, and data collection | 5,6 | We will recruit patients from the outpatient departments of Acupuncture and Moxibustion, and Orthopedics in five clinical centers in China: Chengdu University of                                   |

1  
2  
3  
4  
5  
6  
7  
8  
9  
10  
11  
12  
13  
14  
15  
16  
17  
18  
19  
20  
21  
22  
23  
24  
25  
26  
27  
28  
29  
30  
31  
32  
33  
34  
35  
36  
37  
38  
39  
40  
41  
42  
43  
44  
45  
46

For peer review only

Traditional Chinese Medicine, Hunan University of Traditional Chinese Medicine, Shaanxi University of Traditional Chinese Medicine, Shanxi University of Traditional Chinese Medicine, and Guiyang College of Traditional Chinese Medicine. Healthy subjects without neck or shoulder pain will comprise age- and sex-matched residents from the same communities as the patients. Recruitment strategies will include posting advertisements on social media (such as WeChat, which is similar to Facebook) and at community centers, or by word-of-mouth introductions through subjects already enrolled in the study.

|              |   |                                                                                                                                                                                                                                                                                                                                                                                                                                                                        |             |
|--------------|---|------------------------------------------------------------------------------------------------------------------------------------------------------------------------------------------------------------------------------------------------------------------------------------------------------------------------------------------------------------------------------------------------------------------------------------------------------------------------|-------------|
| Participants | 6 | (a) <i>Cohort study</i> —Give the eligibility criteria, and the sources and methods of selection of participants. Describe methods of follow-up<br><i>Case-control study</i> —Give the eligibility criteria, and the sources and methods of case ascertainment and control selection. Give the rationale for the choice of cases and controls<br><i>Cross-sectional study</i> —Give the eligibility criteria, and the sources and methods of selection of participants | 4, 5, 9, 10 |
|              |   | (b) <i>Cohort study</i> —For matched studies, give matching criteria and number of exposed and                                                                                                                                                                                                                                                                                                                                                                         | 5, 9, 10    |

Patients are eligible for study inclusion if they: (1) have no history of NP and/or restricted neck movement; (2) are males or females aged 18–60 years; (3) provide written informed consent for all procedures in this study. Patients or healthy subjects who consent to study participation will be examined and diagnosed by a hospital doctor. Healthy subjects are eligible if

|    |                              |                                                                                                            |                                                                                                                                                                                      |                                      |
|----|------------------------------|------------------------------------------------------------------------------------------------------------|--------------------------------------------------------------------------------------------------------------------------------------------------------------------------------------|--------------------------------------|
| 1  |                              |                                                                                                            |                                                                                                                                                                                      |                                      |
| 2  |                              | unexposed                                                                                                  |                                                                                                                                                                                      |                                      |
| 3  |                              | <i>Case-control study</i> —For matched studies, give matching criteria and the number of controls per case |                                                                                                                                                                                      |                                      |
| 4  |                              |                                                                                                            |                                                                                                                                                                                      | they: (1) have no history of neck    |
| 5  |                              |                                                                                                            |                                                                                                                                                                                      | pain and/or restricted neck          |
| 6  |                              |                                                                                                            |                                                                                                                                                                                      | movement; (2) are males or           |
| 7  |                              |                                                                                                            |                                                                                                                                                                                      | females aged 18–60 years; (3)        |
| 8  |                              |                                                                                                            |                                                                                                                                                                                      | provide written informed consent     |
| 9  |                              |                                                                                                            |                                                                                                                                                                                      | for all procedures in this study.    |
| 10 |                              |                                                                                                            |                                                                                                                                                                                      | Healthy subjects without neck or     |
| 11 |                              |                                                                                                            |                                                                                                                                                                                      | shoulder pain will comprise age-     |
| 12 |                              |                                                                                                            |                                                                                                                                                                                      | and sex-matched residents from the   |
| 13 |                              |                                                                                                            |                                                                                                                                                                                      | same communities as the patients.    |
| 14 |                              |                                                                                                            |                                                                                                                                                                                      | A ratio of control subjects to cases |
| 15 |                              |                                                                                                            |                                                                                                                                                                                      | of 1.                                |
| 16 |                              |                                                                                                            |                                                                                                                                                                                      |                                      |
| 17 | Variables                    | 7                                                                                                          | Clearly define all outcomes, exposures, predictors, potential confounders, and effect modifiers. Give diagnostic criteria, if applicable                                             | 7-9                                  |
| 18 |                              |                                                                                                            |                                                                                                                                                                                      | Body surface temperature,            |
| 19 |                              |                                                                                                            |                                                                                                                                                                                      | Mechanical pain threshold,           |
| 20 |                              |                                                                                                            |                                                                                                                                                                                      | Pressure pain threshold, Skin        |
| 21 |                              |                                                                                                            |                                                                                                                                                                                      | resistance, Pain, Neck function,     |
| 22 |                              |                                                                                                            |                                                                                                                                                                                      | General demographic information,     |
| 23 |                              |                                                                                                            |                                                                                                                                                                                      | Safety and adverse events.           |
| 24 |                              |                                                                                                            |                                                                                                                                                                                      |                                      |
| 25 | Data sources/<br>measurement | 8*                                                                                                         | For each variable of interest, give sources of data and details of methods of assessment (measurement). Describe comparability of assessment methods if there is more than one group | 7-9                                  |
| 26 |                              |                                                                                                            |                                                                                                                                                                                      | Body surface temperature: Each       |
| 27 |                              |                                                                                                            |                                                                                                                                                                                      | participant will be evaluated in a   |
| 28 |                              |                                                                                                            |                                                                                                                                                                                      | room with a constant temperature     |
| 29 |                              |                                                                                                            |                                                                                                                                                                                      | of 26°C. Investigators will use      |
| 30 |                              |                                                                                                            |                                                                                                                                                                                      | Fotric thermal imaging cameras       |
| 31 |                              |                                                                                                            |                                                                                                                                                                                      | (Fotric 226, IRS Systems Inc.,       |
| 32 |                              |                                                                                                            |                                                                                                                                                                                      | Allen, TX, USA) to make              |
| 33 |                              |                                                                                                            |                                                                                                                                                                                      | measurements at each of the 29       |
| 34 |                              |                                                                                                            |                                                                                                                                                                                      | acupoints in the five body regions.  |
| 35 |                              |                                                                                                            |                                                                                                                                                                                      | The temperature data of each point   |
| 36 |                              |                                                                                                            |                                                                                                                                                                                      | on the images will be analyzed       |
| 37 |                              |                                                                                                            |                                                                                                                                                                                      | using professional software          |
| 38 |                              |                                                                                                            |                                                                                                                                                                                      | (AnalyzeIR, IRS Systems Inc.,        |
| 39 |                              |                                                                                                            |                                                                                                                                                                                      | Allen, TX, USA).                     |
| 40 |                              |                                                                                                            |                                                                                                                                                                                      |                                      |
| 41 |                              |                                                                                                            |                                                                                                                                                                                      |                                      |
| 42 |                              |                                                                                                            |                                                                                                                                                                                      |                                      |

1  
2  
3  
4  
5  
6  
7  
8  
9  
10  
11  
12  
13  
14  
15  
16  
17  
18  
19  
20  
21  
22  
23  
24  
25  
26  
27  
28  
29  
30  
31  
32  
33  
34  
35  
36  
37  
38  
39  
40  
41  
42  
43  
44  
45  
46

---

Mechanical pain threshold:  
Investigators will use the electronic Von Frey esthesiometer (type 2390, IITC Life Science, Woodland Hills, CA, USA) to make two measurements of the mechanical pain threshold at each of the 29 acupoints in the five body regions in turn. If there is a difference of more than 15 g between the two measurements of mechanical pain threshold made at one acupoint, the mechanical pain threshold at that acupoint will be measured a third time. Progressive pressure will be applied at a rate of 10 g/s at each acupoint. The average mechanical pain threshold will be calculated for each acupoint. To reduce the consecutive assessment error for two adjacent points, a method of alternate assessment of acupoints on the left and right sides of the body will be adopted.

Pressure pain threshold:  
Investigators will use the FDIX Force Gauge (Force One™ FDIX, Wagner Instruments, Greenwich, CT, USA) to make two measurements of the PPT at each of the 29 acupoints in the five body regions in turn. If there is a

---



1  
2  
3  
4  
5  
6  
7  
8  
9  
10  
11  
12  
13  
14  
15  
16  
17  
18  
19  
20  
21  
22  
23  
24  
25  
26  
27  
28  
29  
30  
31  
32  
33  
34  
35  
36  
37  
38  
39  
40  
41  
42

---

difference of more than 500 gf between the two PPT measurements performed at one acupoint, the PPT at that acupoint will be measured a third time. Progressive pressure will be applied at a rate of 100 gf/s at each acupoint. The average PPT will be calculated for each acupoint. A method of alternate assessment of the acupoints on the left and right sides of the body will again be adopted.

Skin resistance: Investigators will use the Acupoint dynamics research instrument (LMR30-RIII, Peking University, Beijing, China) to record the skin resistance at nine acupoints (GB-21, GB-20, BL-11, LI-10, SI-3; bilateral) and at the two most sensitive points (if there are two sensitive points).

Pain: Neck pain will be measured using the Visual Analogue Scale, the Northwick Park Neck Pain Questionnaire, and the McGill Pain Questionnaire. The Visual Analogue Scale will be used to measure the severity of pain. The Northwick Park Neck Pain Questionnaire provides a reliable outcome measure for patients with

neck pain, while the McGill Pain Questionnaire is used to measure the different qualities of the subjective pain experience; these questionnaires have been proven valid, and are convenient for patients to complete.

Neck function: The change in neck function will be evaluated by measuring the cervical range of motion before and after treatment.

General demographic information This will include the collection of data regarding age, disease duration, medical history, and medication type and dosage.

Safety and adverse events: Non-invasive assessments of the body surface do not generally cause adverse events. However, we will still record the number and type (e.g. serious pain, fainting) of adverse events in each group.

Participants who experience adverse events will receive the appropriate intervention. Adverse events will be immediately reported to the primary investigator and the ethics committee, and the affected participants will be withdrawn from the study.

|      |   |                                                           |           |                               |
|------|---|-----------------------------------------------------------|-----------|-------------------------------|
| Bias | 9 | Describe any efforts to address potential sources of bias | 6, 10, 11 | All investigators will attend |
|------|---|-----------------------------------------------------------|-----------|-------------------------------|

training to make sure all practices are standardized. And the investigator was not told whether the subject was a patient or a healthy controls.

Data will be blinded, double-entered in EpiData 3.1 software, and adequately checked for errors. To ensure the integrity of the study and protect the rights and health of the participants, we will set up a Data and Safety Monitoring Board. Every 3 months, members of the quality control group will conduct a quality control review at each study site, and produce a report regarding the quality analysis of the whole data collection process.

|            |    |                                           |   |                                                                                                                                                                                                                                                                                                                                                                                                                                                                                                                                |
|------------|----|-------------------------------------------|---|--------------------------------------------------------------------------------------------------------------------------------------------------------------------------------------------------------------------------------------------------------------------------------------------------------------------------------------------------------------------------------------------------------------------------------------------------------------------------------------------------------------------------------|
| Study size | 10 | Explain how the study size was arrived at | 9 | <p>Previous study indicated that the rate of acupoint sensitization in patients ranged from 20% to 70%[26], so we set this rate at 50% to calculate the minimum sample size required for the proposed study. With acupoint sensitization rate of 20% in healthy subjects, the odds ratio is 4. According to Chow's formula in comparing two sample proportion[27], we assumed an <math>\alpha</math> level of 0.05, a <math>\beta</math> of 0.01, a delta of 0.3 (50%-20%=30%), thus, the smallest sample size is 408 with</p> |
|------------|----|-------------------------------------------|---|--------------------------------------------------------------------------------------------------------------------------------------------------------------------------------------------------------------------------------------------------------------------------------------------------------------------------------------------------------------------------------------------------------------------------------------------------------------------------------------------------------------------------------|

1  
2  
3  
4  
5  
6  
7  
8  
9  
10  
11  
12  
13  
14  
15  
16  
17  
18  
19  
20  
21  
22  
23  
24  
25  
26  
27  
28  
29  
30  
31  
32  
33  
34  
35  
36  
37  
38  
39  
40  
41  
42  
43  
44  
45  
46

|                        |    |                                                                                                                              |    |                                                                                                                                                                                                                                                                                                                                                                                                                                                                                                                                                                                         |
|------------------------|----|------------------------------------------------------------------------------------------------------------------------------|----|-----------------------------------------------------------------------------------------------------------------------------------------------------------------------------------------------------------------------------------------------------------------------------------------------------------------------------------------------------------------------------------------------------------------------------------------------------------------------------------------------------------------------------------------------------------------------------------------|
|                        |    |                                                                                                                              |    | two-sided confidence and a ratio of control subjects to cases of 1 (TrialSize package in R software). Considering the potential non-response rate and sampling effectiveness as 10%, the final sample size is 448 (224 patients, plus 224 age- and sex-matched healthy subjects).                                                                                                                                                                                                                                                                                                       |
| Quantitative variables | 11 | Explain how quantitative variables were handled in the analyses. If applicable, describe which groupings were chosen and why | 10 | Parametric statistical testing (t-test) will be used for data that are normally distributed; otherwise, non-parametric statistical testing (Wilcoxon’s signed rank test) will be used.                                                                                                                                                                                                                                                                                                                                                                                                  |
| Statistical methods    | 12 | (a) Describe all statistical methods, including those used to control for confounding                                        | 10 | First, the distribution of basic information in the case and control groups will be described, including age, sex, height, weight, job occupation, and education level. Data will be presented as means (SD) for continuous variables, and as frequency (percentage) for categorical variables. The distributions of sensitized points will be shown in scatter plots to represent the skin morphological changes. The distributions of the intensity of NP and neck function will also be described. Hypothetical testing will then be performed to assess the differences between the |

1  
2  
3  
4  
5  
6  
7  
8  
9  
10  
11  
12  
13  
14  
15  
16  
17  
18  
19  
20  
21  
22  
23  
24  
25  
26  
27  
28  
29  
30  
31  
32  
33  
34  
35  
36  
37  
38  
39  
40  
41  
42  
43  
44  
45  
46

case and control groups in body surface sensations and biophysical properties, including body surface temperature, mechanical pain threshold, PPT, and skin resistance. Parametric statistical testing (t-test) will be used for data that are normally distributed; otherwise, non-parametric statistical testing (Wilcoxon's signed rank test) will be used. If there is a difference between the case and control groups in body surface temperature, mechanical pain threshold, PPT, or skin resistance, the cut-off values for these indexes to distinguish between sensitive and non-sensitive states (including heat-sensitivity, pain-sensitivity, and electrical-sensitivity) will be detected using receiver operating characteristic curve analyses. Finally, the acupoint sensitization rates of patients and healthy subjects will be calculated separately regarding the aspects of heat, pain, and electrical sensitivity to identify the most important form of sensitivity for all acupoints. Meanwhile, OR represents the ratio of acupoint sensitization of patients and healthy subjects. Therefore, this study

|                   |     |                                                                                                                                                                                                                                                                                                           |     |                                                                                                                                        |
|-------------------|-----|-----------------------------------------------------------------------------------------------------------------------------------------------------------------------------------------------------------------------------------------------------------------------------------------------------------|-----|----------------------------------------------------------------------------------------------------------------------------------------|
|                   |     |                                                                                                                                                                                                                                                                                                           |     | combines OR and sensitization rate of all acupoints to find out the optimal points in each sensitization.                              |
|                   |     | (b) Describe any methods used to examine subgroups and interactions                                                                                                                                                                                                                                       | N/A |                                                                                                                                        |
|                   |     | (c) Explain how missing data were addressed                                                                                                                                                                                                                                                               | 10  | Missing data will be processed without imputation.                                                                                     |
|                   |     | (d) <i>Cohort study</i> —If applicable, explain how loss to follow-up was addressed<br><i>Case-control study</i> —If applicable, explain how matching of cases and controls was addressed<br><i>Cross-sectional study</i> —If applicable, describe analytical methods taking account of sampling strategy | 5,6 | Healthy subjects without neck or shoulder pain will comprise age- and sex-matched residents from the same communities as the patients. |
|                   |     | (e) Describe any sensitivity analyses                                                                                                                                                                                                                                                                     | N/A |                                                                                                                                        |
| <b>Results</b>    |     |                                                                                                                                                                                                                                                                                                           |     |                                                                                                                                        |
| Participants      | 13* | (a) Report numbers of individuals at each stage of study—eg numbers potentially eligible, examined for eligibility, confirmed eligible, included in the study, completing follow-up, and analysed                                                                                                         | N/A |                                                                                                                                        |
|                   |     | (b) Give reasons for non-participation at each stage                                                                                                                                                                                                                                                      | N/A |                                                                                                                                        |
|                   |     | (c) Consider use of a flow diagram                                                                                                                                                                                                                                                                        | N/A |                                                                                                                                        |
| Descriptive data  | 14* | (a) Give characteristics of study participants (eg demographic, clinical, social) and information on exposures and potential confounders                                                                                                                                                                  | N/A |                                                                                                                                        |
|                   |     | (b) Indicate number of participants with missing data for each variable of interest                                                                                                                                                                                                                       | N/A |                                                                                                                                        |
|                   |     | (c) <i>Cohort study</i> —Summarise follow-up time (eg, average and total amount)                                                                                                                                                                                                                          | N/A |                                                                                                                                        |
| Outcome data      | 15* | <i>Cohort study</i> —Report numbers of outcome events or summary measures over time                                                                                                                                                                                                                       | N/A |                                                                                                                                        |
|                   |     | <i>Case-control study</i> —Report numbers in each exposure category, or summary measures of exposure                                                                                                                                                                                                      | N/A |                                                                                                                                        |
|                   |     | <i>Cross-sectional study</i> —Report numbers of outcome events or summary measures                                                                                                                                                                                                                        | N/A |                                                                                                                                        |
| Main results      | 16  | (a) Give unadjusted estimates and, if applicable, confounder-adjusted estimates and their precision (eg, 95% confidence interval). Make clear which confounders were adjusted for and why they were included                                                                                              | N/A |                                                                                                                                        |
|                   |     | (b) Report category boundaries when continuous variables were categorized                                                                                                                                                                                                                                 | N/A |                                                                                                                                        |
|                   |     | (c) If relevant, consider translating estimates of relative risk into absolute risk for a meaningful time period                                                                                                                                                                                          | N/A |                                                                                                                                        |
| Other analyses    | 17  | Report other analyses done—eg analyses of subgroups and interactions, and sensitivity analyses                                                                                                                                                                                                            | N/A |                                                                                                                                        |
| <b>Discussion</b> |     |                                                                                                                                                                                                                                                                                                           |     |                                                                                                                                        |

|    |                          |    |                                                                                                                                                                            |        |
|----|--------------------------|----|----------------------------------------------------------------------------------------------------------------------------------------------------------------------------|--------|
| 1  |                          |    |                                                                                                                                                                            |        |
| 2  | Key results              | 18 | Summarise key results with reference to study objectives                                                                                                                   | N/A    |
| 3  |                          |    |                                                                                                                                                                            |        |
| 4  | Limitations              | 19 | Discuss limitations of the study, taking into account sources of potential bias or imprecision. Discuss both direction and magnitude of any potential bias                 | 11, 12 |
| 5  |                          |    |                                                                                                                                                                            |        |
| 6  |                          |    |                                                                                                                                                                            |        |
| 7  |                          |    |                                                                                                                                                                            |        |
| 8  |                          |    |                                                                                                                                                                            |        |
| 9  |                          |    |                                                                                                                                                                            |        |
| 10 |                          |    |                                                                                                                                                                            |        |
| 11 |                          |    |                                                                                                                                                                            |        |
| 12 |                          |    |                                                                                                                                                                            |        |
| 13 |                          |    |                                                                                                                                                                            |        |
| 14 |                          |    |                                                                                                                                                                            |        |
| 15 |                          |    |                                                                                                                                                                            |        |
| 16 |                          |    |                                                                                                                                                                            |        |
| 17 |                          |    |                                                                                                                                                                            |        |
| 18 |                          |    |                                                                                                                                                                            |        |
| 19 |                          |    |                                                                                                                                                                            |        |
| 20 |                          |    |                                                                                                                                                                            |        |
| 21 |                          |    |                                                                                                                                                                            |        |
| 22 | Interpretation           | 20 | Give a cautious overall interpretation of results considering objectives, limitations, multiplicity of analyses, results from similar studies, and other relevant evidence | N/A    |
| 23 |                          |    |                                                                                                                                                                            |        |
| 24 |                          |    |                                                                                                                                                                            |        |
| 25 | Generalisability         | 21 | Discuss the generalisability (external validity) of the study results                                                                                                      | 3      |
| 26 |                          |    |                                                                                                                                                                            |        |
| 27 |                          |    |                                                                                                                                                                            |        |
| 28 |                          |    |                                                                                                                                                                            |        |
| 29 |                          |    |                                                                                                                                                                            |        |
| 30 |                          |    |                                                                                                                                                                            |        |
| 31 |                          |    |                                                                                                                                                                            |        |
| 32 |                          |    |                                                                                                                                                                            |        |
| 33 |                          |    |                                                                                                                                                                            |        |
| 34 |                          |    |                                                                                                                                                                            |        |
| 35 |                          |    |                                                                                                                                                                            |        |
| 36 |                          |    |                                                                                                                                                                            |        |
| 37 |                          |    |                                                                                                                                                                            |        |
| 38 | <b>Other information</b> |    |                                                                                                                                                                            |        |
| 39 | Funding                  | 22 | Give the source of funding and the role of the funders for the present study and, if applicable, for the original study on which the present article is based              | 12     |
| 40 |                          |    |                                                                                                                                                                            |        |
| 41 |                          |    |                                                                                                                                                                            |        |
| 42 |                          |    |                                                                                                                                                                            |        |
| 43 |                          |    |                                                                                                                                                                            |        |
| 44 |                          |    |                                                                                                                                                                            |        |
| 45 |                          |    |                                                                                                                                                                            |        |
| 46 |                          |    |                                                                                                                                                                            |        |

Science Foundation of China (no. 81590950, 81590951, 81722050).

\*Give information separately for cases and controls in case-control studies and, if applicable, for exposed and unexposed groups in cohort and cross-sectional studies.

**Note:** An Explanation and Elaboration article discusses each checklist item and gives methodological background and published examples of transparent reporting. The STROBE checklist is best used in conjunction with this article (freely available on the Web sites of PLoS Medicine at <http://www.plosmedicine.org/>, Annals of Internal Medicine at <http://www.annals.org/>, and Epidemiology at <http://www.epidem.com/>). Information on the STROBE Initiative is available at [www.strobe-statement.org](http://www.strobe-statement.org).

For peer review only



# BMJ Open

## Identification of the optimal points for the acupuncture treatment of neck pain in China: protocol for a multicenter, matched, case-control study

|                                 |                                                                                                                                                                                                                                                                                                                                                                                                                                                                                                                                                                                                                                                                                                                                                                                                                                                                                                                                                                                                                                                                                                                                                       |
|---------------------------------|-------------------------------------------------------------------------------------------------------------------------------------------------------------------------------------------------------------------------------------------------------------------------------------------------------------------------------------------------------------------------------------------------------------------------------------------------------------------------------------------------------------------------------------------------------------------------------------------------------------------------------------------------------------------------------------------------------------------------------------------------------------------------------------------------------------------------------------------------------------------------------------------------------------------------------------------------------------------------------------------------------------------------------------------------------------------------------------------------------------------------------------------------------|
| Journal:                        | <i>BMJ Open</i>                                                                                                                                                                                                                                                                                                                                                                                                                                                                                                                                                                                                                                                                                                                                                                                                                                                                                                                                                                                                                                                                                                                                       |
| Manuscript ID                   | bmjopen-2019-029194.R3                                                                                                                                                                                                                                                                                                                                                                                                                                                                                                                                                                                                                                                                                                                                                                                                                                                                                                                                                                                                                                                                                                                                |
| Article Type:                   | Protocol                                                                                                                                                                                                                                                                                                                                                                                                                                                                                                                                                                                                                                                                                                                                                                                                                                                                                                                                                                                                                                                                                                                                              |
| Date Submitted by the Author:   | 19-Jul-2019                                                                                                                                                                                                                                                                                                                                                                                                                                                                                                                                                                                                                                                                                                                                                                                                                                                                                                                                                                                                                                                                                                                                           |
| Complete List of Authors:       | Sun, Mingsheng; Chengdu University of Traditional Chinese Medicine, College of Acupuncture and Tuina<br>Tao, Siyuan; Sichuan University, West China School of Public Health<br>Geng, Guoyan; Chengdu University of Traditional Chinese Medicine, College of Acupuncture and Tuina<br>Peng, Jieru; Sichuan University, West China School of Public Health<br>Ma, Xingsha; Chengdu University of Traditional Chinese Medicine, College of Acupuncture and Tuina<br>Yan, Mingxi; Chengdu University of Traditional Chinese Medicine, College of Acupuncture and Tuina<br>Chen, Jiao; Chengdu University of Traditional Chinese Medicine, College of Acupuncture and Tuina<br>Cai, Dingjun; Chengdu University of Traditional Chinese Medicine, College of Acupuncture and Tuina<br>Zheng, Hui ; Chengdu University of Traditional Chinese Medicine, College of Acupuncture and Tuina<br>Yang, Chunxia; Sichuan University, West China School of Public Health<br>Zhao, Ling; Chengdu University of Traditional Chinese Medicine, College of Acupuncture and Moxibustion and Tuina<br>Liang, Fan-rong; Chengdu University of Traditional Chinese Medicine |
| <b>Primary Subject Heading</b>: | Complementary medicine                                                                                                                                                                                                                                                                                                                                                                                                                                                                                                                                                                                                                                                                                                                                                                                                                                                                                                                                                                                                                                                                                                                                |
| Secondary Subject Heading:      | Complementary medicine                                                                                                                                                                                                                                                                                                                                                                                                                                                                                                                                                                                                                                                                                                                                                                                                                                                                                                                                                                                                                                                                                                                                |
| Keywords:                       | sensitized points, neck pain, study protocol, observational study                                                                                                                                                                                                                                                                                                                                                                                                                                                                                                                                                                                                                                                                                                                                                                                                                                                                                                                                                                                                                                                                                     |
|                                 |                                                                                                                                                                                                                                                                                                                                                                                                                                                                                                                                                                                                                                                                                                                                                                                                                                                                                                                                                                                                                                                                                                                                                       |

SCHOLARONE™  
Manuscripts

1  
2  
3  
4 **Identification of the optimal points for the acupuncture treatment of neck pain**  
5  
6 **in China: protocol for a multicenter, matched, case-control study**

7 Ming-Sheng Sun<sup>1†</sup>, Si-Yuan Tao<sup>2†</sup>, Guo-Yan Geng<sup>1†</sup>, Jie-Ru Peng<sup>2</sup>, Xing-Sha Ma<sup>1</sup>, Ming-Xi Yan<sup>1</sup>,  
8 Jiao Chen<sup>1</sup>, Ding-Jun Cai<sup>1</sup>, Hui Zheng<sup>1</sup>, Chun Xia Yang<sup>2</sup>, Ling Zhao<sup>1\*</sup>, Fan-Rong Liang<sup>1\*</sup>  
9

10  
11  
12  
13 † Ming-Sheng Sun, Si-Yuan Tao, and Guo-Yan Geng contributed equally to this work.  
14  
15

16  
17 <sup>1</sup> College of Acupuncture and Tuina, Chengdu University of Traditional Chinese Medicine,  
18 Chengdu, 610075, China  
19

20  
21 <sup>2</sup> West China School of Public Health, Sichuan University, Chengdu, 610041, China  
22

23  
24  
25 **\*Corresponding authors**

26 Professor Ling Zhao

27 Postal address: 37 Shierqiao Road, Chengdu, Sichuan, China

28 Telephone: +86 13568801429

29 Email: [zhaoling@cdutcm.edu.cn](mailto:zhaoling@cdutcm.edu.cn)  
30  
31

32 Professor Fan-Rong Liang

33 Postal address: 37 Shierqiao Road, Chengdu, Sichuan, China

34 Telephone: +86 13608058216

35 Email: [acuresearch@126.com](mailto:acuresearch@126.com)  
36  
37

38  
39  
40  
41  
42  
43  
44  
45  
46 **Word count:** 2745 words  
47

48  
49  
50 **Keywords:** sensitized points, neck pain, study protocol, observational study  
51  
52  
53  
54  
55  
56  
57  
58  
59  
60

## ABSTRACT

**Introduction:** Neck pain (NP) is a common condition that can be effectively treated by acupuncture. However, several treatment point prescriptions (i.e., local acupoints, distal acupoints, and sensitized acupoints) may be used. The present study aims to identify the types of sensitization and the distribution of sensitized points in patients with NP, to analyze the cutoff values and sensitization rate for acupoint sensitization, and to summarize the dominant forms of optimally-sensitized points. This information will be helpful when choosing the optimal points to treat NP.

**Methods and analysis:** This multicenter, matched, case-control study will enroll 224 patients with NP, and 224 age- and sex-matched healthy participants as controls. Body surface temperature, mechanical pain threshold, pressure pain threshold, and skin resistance will be assessed at the 15 acupoints most frequently used to treat NP, and at the five body regions in which pain occurs most frequently. Hypothesis testing will be used to compare the differences in variables between cases and controls. In addition, receiver operating characteristic curve analysis will be used to explore the cutoff values of the sensitive states of heat, pain, and electrical resistance, which indicate sensitization of the acupoint. The optimal points will be comprehensively determined by the acupoint sensitization rate and odds ratio (OR).

**Ethics and dissemination:** Ethical approval of this study has been granted by the Research Ethical Committee of the Teaching Hospital of Chengdu University of Traditional Chinese Medicine (ID: 2018KL-016). The outcomes of the study will be disseminated through peer-reviewed publications.

**Trial registration:** ChiCTR1800016220.

### Strengths and limitations of this study

- ▶ This study will provide information about the forms of sensitization and the distribution of sensitized points in patients with NP using the largest known sample, in a strict observational study.
- ▶ Objective or semi-objective biological measure, body surface temperature, mechanical pain threshold, pressure pain threshold, and skin resistance, will be assessed as a preliminary exploration of the different forms of sensitization.
- ▶ This study will attempt to define acupoint sensitization in patients with NP using a cutoff value for identifying point sensitization.
- ▶ The representativeness and generalizability of the study results will be limited because we are

1  
2  
3  
4 including only patients with nontraumatic NP with mobility deficits.  
5  
6

## 7 **INTRODUCTION**

9 Neck pain (NP) is a common clinical condition often accompanied by tenderness at sensitive points.  
10  
11 The global lifetime prevalence of NP was 48.5% in 2006.[1] The prevalence in white-collar workers  
12  
13 in China was 33.9%-54.8% in 2016 and has increased in recent years,[2] imposing considerable  
14  
15 personal and socioeconomic burdens. Muscle relaxants and non-steroidal anti-inflammatory drugs  
16  
17 are used to treat this condition; however, these medications carry a risk of adverse effects, and  
18  
19 neither drug is better than non-pharmacological alternative treatments.[1]  
20

21 Because non-pharmacological alternative treatments have reliable efficacy and availability, this type  
22  
23 of treatment is gaining increasing recognition worldwide. Acupuncture is one type of non-  
24  
25 pharmacological alternative treatment that can effectively treat NP. Although several studies have  
26  
27 confirmed that acupuncture is effective, outcomes are closely related to point selection.[3] Previous  
28  
29 studies have evaluated the use of local acupoints[4] or distal acupoints,[5] with the treatment of both  
30  
31 types reportedly having a certain degree of clinical efficacy.  
32

33 Recent Chinese research has found that acupoints can be sensitized, with associated changes in  
34  
35 function and size, and thus can functionally change from a relatively "silent" state to a relatively  
36  
37 "active" state. Treatment of an acupoint while it is in the "active" state is thought to achieve a better  
38  
39 clinical outcome, and this has become a focus in acupoint research.[6-8] Several types of sensitivity  
40  
41 manifest at sensitized points, including pain-sensitivity, heat-sensitivity, and form-sensitivity  
42  
43 (appearance changes). Recent clinical studies report that a superior outcome is obtained using  
44  
45 acupuncture at pain-sensitive points,[9] and moxibustion at heat-sensitive points[10] or visually-  
46  
47 sensitive points.[11] However, most of the current observational studies have focused on only one  
48  
49 form of sensitization in small-sized sample populations, and thus are not comprehensive studies of  
50  
51 different forms of sensitization.[6 10] The choice of optimal treatment points for NP in clinical  
52  
53 practice remain controversial.

54 Herein, we describe the protocol for an observational study that aims to identify the different types  
55  
56 of sensitization (e.g. temperature, tenderness) and the distribution of sensitized acupoints in patients  
57  
58 with NP, to analyze the cutoff values for acupoint sensitization, and to determine the most optimal  
59  
60 sensitization types seen at sensitized points. We believe that in the state of disease, sensitive points

1  
2  
3  
4 occur with high frequency (manifested as changes in temperature, pain threshold etc.), that sensitive  
5  
6 points with different sensitization overlap, and that the optimal overlapping points may be closely  
7  
8 related to selecting the clinical treatment points. Previous small sample-sized studies have  
9  
10 confirmed the feasibility of sensitization testing.[7] The present study will provide evidence for  
11  
12 selecting the optimal treatment points for NP in clinical practice.

## 13 14 15 **METHODS AND ANALYSIS**

### 16 17 **Study design**

18  
19 This is a multicenter, age- and sex-matched, case-control study. The protocol was developed in  
20  
21 accordance with the Strengthening the Reporting of Observational Studies in Epidemiology  
22  
23 guidelines.[12] The study has been registered with ChiCTR at Current Controlled Trials  
24  
25 (ChiCTR1800016203). A flowchart of the study design is shown in Figure 1.

### 26 27 28 29 **Ethics**

30  
31 This study was designed in accordance with the principles of the Declaration of Helsinki. The study  
32  
33 protocol has been approved by the Ethics Committee of the First Affiliated Hospital of Chengdu  
34  
35 University of Traditional Chinese Medicine (approval number: 2018KL-016), and is registered on  
36  
37 the primary registry in the World Health Organization registry network (Chinese Clinical Trial  
38  
39 Registry: no. ChiCTR1800016203). Signed consent will be obtained from each participant after  
40  
41 they have been informed of the study procedures, possible risks, and their right to withdraw from  
42  
43 the study.

### 44 45 46 **Patients and healthy participants (controls)**

#### 47 48 **Inclusion criteria**

49  
50 Patients are eligible for study inclusion if they: (1) have nontraumatic NP with mobility deficits in  
51  
52 the acute and chronic stages (2) are males or females aged 18–60 years; and (3) provide written  
53  
54 informed consent for all procedures in this study.

55  
56  
57  
58 Healthy participants as controls subjects are eligible if they: (1) have no history of NP and/or  
59  
60 restricted neck movement; (2) are males or females aged 18–60 years; and (3) provide written

1  
2  
3  
4 informed consent for all procedures in this study.  
5  
6

### 7 **Exclusion criteria**

8  
9 Patients are ineligible if they: (1) have complicated neck or shoulder pain caused by cervical and  
10 intervertebral disc degeneration, such as other types of cervical spondylosis, shoulder periartthritis,  
11 rheumatic myofibrillar inflammation; (2) have history of neck fracture or surgery, or cervical  
12 congenital abnormality; (3) have serious disease related to the heart, liver, kidney, or hematopoietic  
13 system; (4) have difficulty answering questionnaires because of cognitive impairment; (5) have  
14 dermatopathological diseases; or (6) are pregnant, breastfeeding, or planning a pregnancy during  
15 the study period.  
16  
17  
18  
19  
20  
21  
22

23  
24  
25 Healthy participants are ineligible if they: (1) have serious disease related to the heart, liver, kidney,  
26 or hematopoietic system; (2) have cervical congenital abnormality; (3) have difficulty answering  
27 the questionnaires because of cognitive impairment; (4) have dermatopathological diseases; or (5)  
28 are pregnant, breastfeeding, or planning a pregnancy during the study period.  
29  
30  
31  
32

### 33 **Recruitment strategies**

34  
35 We will recruit patients from the outpatient departments of Acupuncture and Moxibustion, and  
36 Orthopedics in five clinical centers in China: Chengdu University of Traditional Chinese Medicine,  
37 Hunan University of Traditional Chinese Medicine, Shaanxi University of Traditional Chinese  
38 Medicine, Shanxi University of Traditional Chinese Medicine, and Guiyang College of Traditional  
39 Chinese Medicine. Healthy participants without neck or shoulder pain will comprise age- and sex-  
40 matched residents from the same communities as the patients, to act as controls. Recruitment  
41 strategies will include posting advertisements on social media (such as WeChat, which is similar to  
42 Facebook) and at community centers, or by word-of-mouth introductions through participants  
43 already enrolled in the study. Patients or healthy participants who consent to study participation will  
44 be examined and diagnosed by a hospital doctor.  
45  
46  
47  
48  
49  
50  
51  
52  
53  
54  
55  
56  
57

### 58 **Test regions, acupoints, and sensitized points**

59 Following the results of literature data-mining and expert consensus on the treatment of NP, we  
60

identified the 15 most frequently used acupoints (Table 1) and the five regions of the body with the most frequent occurrence of pain and the greatest degree of acupoint sensitization. The body will be divided into five regions to standardize the treatment procedures and detection areas. Regions 1 and 2 are each bordered by the respective ipsilateral mastoid, sternal end of the clavicle, anterior axillary line, acromion, and C7 spinous process. Region 3 is the triangular region bordered by both sides of the mastoid and the C7 spinous process. Regions 4 and 5 are each bordered by the respective ipsilateral C7 spinous process, acromion, and axillary line; the two regions are divided by the posterior midline. These regions are the same as those used in previous studies of NP,[13] and include the upper trapezius, splenius capitis muscles, sternocleidomastoid, levator scapulae, infraspinatus, scalene, subscapularis muscles, and other neck muscles associated with NP.[14 15] These regions and acupoints are shown in Figure 2.

Investigators will mark the 29 acupoints on each patient. All investigators will attend training to ensure all practices are standardized. Investigators will be blinded regarding whether participants are patients or healthy controls. The investigator will palpate the detection area associated with each acupoint using the appropriate force (< 2,000 gf), and will identify sensitized points that have pain/sourness/heaviness/fullness or nodules.

**Table 1** Acupoints selected for use in the study

| Acupoints            | Location                                                                                                                                               |
|----------------------|--------------------------------------------------------------------------------------------------------------------------------------------------------|
| Jianjing (GB-21)     | On the shoulder, directly above the nipple, at the midpoint of the line connecting Dazhui (DU-14) with the acromial end of clavicle                    |
| Jianzhongshu (SI-15) | On the back, 2 cun lateral to the lower border of the spinous process of the 7 <sup>th</sup> cervical vertebra                                         |
| Wangu (GB-12)        | On the head, in the depression posterior and inferior to the mastoid process.                                                                          |
| Fengchi (GB-20)      | On the nape, below the occipital, on a level with Fengfu (DU-16), in the depression between the upper portion of trapezius and the sternocleidomastoid |
| Tianzhu (BL-10)      | On the nape, 1.3 cun lateral to the posterior hairline, in the depression of the posterior hairline lateral to the trapezius muscle                    |
| Dazhui (DU-14)       | On the posterior median line, in the depression below the spinous process of the 7 <sup>th</sup> cervical vertebra                                     |
| Dazhu (BL-11)        | On the back, 1.5 cun lateral to the lower border of the spinous process of the 1 <sup>st</sup> thoracic vertebra                                       |
| Jianwaishu (SI-14)   | On the back, 3 cun lateral to the lower border of the spinous process of the first thoracic vertebra                                                   |

|    |                   |                                                                                              |
|----|-------------------|----------------------------------------------------------------------------------------------|
| 1  |                   |                                                                                              |
| 2  |                   |                                                                                              |
| 3  | Tianliao (SJ-15)  | On the region of scapula, at the midpoint of the line connecting Jianjing                    |
| 4  |                   | (GB-21) with Quyuan (SI-13), on the superior angle of the scapula                            |
| 5  |                   |                                                                                              |
| 6  | Jugu (LI-16)      | In the upper portion of the shoulder, in the depression between the                          |
| 7  |                   | acromial end of clavicle and the scapular spine                                              |
| 8  |                   |                                                                                              |
| 9  | Tianzong (SI-11)  | In the region of the scapula, in the depression of the center of the                         |
| 10 |                   | subscapular fossa, on a level with the 4 <sup>th</sup> thoracic vertebra                     |
| 11 | Shousanli (LI-10) | Flexing the elbow, on the dorsal radial side of the forearm, on the line                     |
| 12 |                   | connecting Yangxi (LI-5) with Quchi (LI-11), 2cun below the transverse                       |
| 13 |                   | cuticular crease                                                                             |
| 14 |                   |                                                                                              |
| 15 | Lieque (LU-7)     | On the radial margin of the forearm, 1.5 cun above the transverse crease                     |
| 16 |                   | of the wrist, between the branchioradial muscle and the long abductor                        |
| 17 |                   | muscle tendon of thumb                                                                       |
| 18 |                   |                                                                                              |
| 19 | Zhongzhu (SJ-3)   | On the dorsum of the hand, in the depression between the 4 <sup>th</sup> and 5 <sup>th</sup> |
| 20 |                   | metacarpal bones, proximal to the 4 <sup>th</sup> metacarpalangeal joint                     |
| 21 |                   |                                                                                              |
| 22 | Houxi (SI-3)      | On the ulna side of the palm, proximate to the fifth metacarpophalangeal                     |
| 23 |                   | joint, at the end of transverse crease of metacarpophalangeal joint, at the                  |
| 24 |                   | dorsoventral boundary                                                                        |
| 25 | <hr/>             |                                                                                              |

### Outcome measurements

All data collection for each patient will be completed on the same day.

### Body surface temperature

Thermal imaging technology has been widely used to assess pain and muscle damage.[16 17] Each participant will be evaluated in a room with a constant temperature of 26°C. Investigators will use thermal imaging cameras (Fotric 226, IRS Systems Inc., Allen, TX, USA) to take measurements at each of the 29 acupoints in the five body regions. The temperature data for each point on the images will be analyzed using professional software (AnalyzeIR, IRS Systems Inc., Allen, TX, USA).

### Mechanical pain threshold

Investigators will use the electronic Von Frey esthesiometer (model 2390; IITC Life Science, Woodland Hills, CA, USA) to take two measurements of the mechanical pain threshold at each of the 29 acupoints in the five body regions in turn. Previous studies have found that this device can detect hyperalgesia and changes in sensory nerve function.[18-20] Mechanical pain caused by punctate stimuli is related to A $\delta$ -fibers.[21] If there is a difference of more than 15 g between the two measurements of mechanical pain threshold made at one acupoint, the mechanical pain threshold at that acupoint will be measured a third time. Progressive pressure will be applied at a



1  
2  
3  
4 rate of 10 g/s at each acupoint, and we will calculate the average mechanical pain threshold for each  
5 acupoint. To reduce the consecutive assessment error for two adjacent points, an alternate  
6 assessment method for acupoints on the left and right sides of the body will be adopted.  
7  
8  
9

### 10 11 **Pressure pain threshold**

12  
13 The pressure pain threshold (PPT) is widely used clinically as a semi-objective method with which  
14 to quantify localized pain.[22 23] Pain caused by blunt pressure stimuli is related to C-fibers.[21]  
15 Investigators will use the FDIX Force Gauge (Force One™ FDIX, Wagner Instruments, Greenwich,  
16 CT, USA) to take two PPT measurements at each of the 29 acupoints in the five body regions in  
17 turn. If there is a difference of more than 500 gf between the two PPT measurements performed at  
18 one acupoint, the PPT at that acupoint will be measured a third time. Progressive pressure will be  
19 applied at a rate of 100 gf/s at each acupoint, and the average PPT will be calculated. An alternate  
20 assessment method for the acupoints on the left and right sides of the body will be adopted.  
21  
22  
23  
24  
25  
26  
27  
28  
29  
30

### 31 **Skin resistance**

32  
33 Investigators will use the Acupoint Dynamics Research Instrument (LMR30-RIII, Peking  
34 University, Beijing, China) to record the skin resistance at nine acupoints, bilateral (GB-21, GB-  
35 20, BL-11, LI-10, SI-3) and at the two most sensitive points (if there are two sensitive points).  
36  
37  
38  
39  
40

### 41 **Pain**

42  
43 NP will be measured using the Visual Analogue Scale, the Northwick Park Neck Pain Questionnaire,  
44 and the McGill Pain Questionnaire. The Visual Analogue Scale will be used to measure pain severity  
45 . The Northwick Park Neck Pain Questionnaire provides a reliable outcome measure for patients  
46 with NP, and the McGill Pain Questionnaire is used to measure the different qualities of subjective  
47 pain; these questionnaires have been proven valid, and are convenient for patients to complete.[24  
48  
49  
50  
51  
52  
53  
54  
55  
56  
57  
58  
59  
60

### 56 **Neck function**

58 Changes in neck function will be evaluated by measuring cervical range of motion.

### General demographic information

This will include the collection of data regarding age, disease duration, medical history, and medication type and dosage.

### Safety and adverse events

Non-invasive assessments of the body surface do not generally cause adverse events. However, we will record the number and type (e.g. serious pain, fainting) of adverse events in each group. Participants who experience adverse events will receive the appropriate intervention. We will report adverse events immediately to the primary investigator and the ethics committee, and the affected participants will be withdrawn from the study.

### Patients and public involvement

Patients and the public have not and will not be involved in the design and conception of this study.

### Sample size calculation

A previous study indicated that the rate of acupoint sensitization in patients ranged from 20% to 70%;[26] therefore, we set this rate at 50% to calculate the minimum sample size required for the proposed study. With an acupoint sensitization rate of 20% in healthy participants, the odds ratio is 4. According to Chow's formula for comparing two sample proportions,[27] we assumed  $\alpha = 0.05$ , and  $\beta = 0.01$ , thus, the smallest sample size is 408 with two-sided confidence and a ratio of control participants to cases of 1 (TrialSize package in R; The R Project for Statistical Computing, Copenhagen, Denmark). Setting the potential non-response rate and sampling effectiveness at 10%, the final sample size is 448 (224 patients, plus 224 age- and sex-matched healthy controls).

### Statistical analysis

Data will be blinded, double-entered in EpiData 3.1 software (EpiData Association, Odense, Denmark), and adequately checked for errors. SPSS 21.0 (IBM Inc., Armonk, NY, USA) will then be used to complete the statistical analyses. The statistical data evaluation will be performed independently by the West China School of Public Health at Sichuan University, China. Missing data will be processed without imputation. First, the distribution of basic information in the case

1  
2  
3  
4 and control groups will be described for age, sex, height, weight, occupation, and education level.  
5  
6 Data will be presented as means (standard deviation (SD)) for continuous variables, and as  
7  
8 frequency (percentage) for categorical variables. The distributions of sensitized points will be shown  
9  
10 in scatter plots to represent skin morphological changes. We will also describe the distributions of  
11  
12 the intensity of NP and neck function. Hypothetical testing will then be performed to assess the  
13  
14 differences between the case and control groups regarding body surface sensations and biophysical  
15  
16 properties, including body surface temperature, mechanical pain threshold, PPT, and skin resistance.  
17  
18 Parametric statistical testing (t-test) will be used for data that are normally distributed; otherwise,  
19  
20 non-parametric statistical testing (Wilcoxon's signed rank test) will be used. If there is a difference  
21  
22 between the case and control groups in body surface temperature, mechanical pain threshold, PPT,  
23  
24 or skin resistance, the cut-off values for these indices to distinguish between sensitive and non-  
25  
26 sensitive states (including heat-sensitivity, pain-sensitivity, and electrical-sensitivity) will be  
27  
28 detected using receiver operating characteristic curve analyses. Finally, the acupoint sensitization  
29  
30 rates of the patients and healthy controls will be calculated separately for heat, pain, and electrical  
31  
32 sensitivity to identify the most important form of sensitivity for all acupoints. The odds ratio (OR)  
33  
34 will represent the ratio of acupoint sensitization in the patients and healthy controls; therefore, we  
35  
36 will combine OR and the sensitization rate of all acupoints to determine the optimal points for each  
37  
38 sensitization.

### 40 **Quality control**

41  
42 This is a multi-center observational study; therefore, quality control will play a vital role in  
43  
44 extrapolating the conclusions. To ensure the integrity of the study and to protect the rights and health  
45  
46 of the participants, we will set up a Data and Safety Monitoring Board. The Data and Safety  
47  
48 Monitoring Board will be developed in accordance with the Operational Guidelines for the  
49  
50 Establishment and Functioning of the Data and Safety Monitoring Boards of the World Health  
51  
52 Organization. Separate from the Data and Safety Monitoring Board, a quality control group will be  
53  
54 established to guarantee the validity and reliability of results. Before study commencement,  
55  
56 fieldwork operation manuals will be prepared, and pilot study participants from all centers will  
57  
58 undergo training in accordance with the standard operating procedure of this study. Every 3 months,  
59  
60 members of the quality control group will perform a quality control review at each study site and

1  
2  
3  
4 produce a report regarding the quality analysis of the entire data collection process.  
5  
6

## 7 **DISCUSSION**

9 NP is the third-most common chronic pain condition, and the fourth leading cause of disability  
10 worldwide.[28] Acupuncture is a popular non-pharmacological modality to relieve pain. The latest  
11 research has reported that acupuncture at sensitive points may provide the most effective  
12 treatment.[8 29] When the body is in a diseased state, there are morphological form-sensitive point  
13 changes, such as nodules, pimples, uplifting, dimpling, and changes in skin color.[30] Thermal  
14 imaging has proven that the temperature of corresponding acupoints will be obviously abnormal  
15 when a patient has visceral illness, such as diseases of the heart, lung, and stomach, indicating that  
16 the temperature of acupoints can reflect the physiological and pathological phenomena of the  
17 affected organs.[31] Studies have confirmed that the PPT at acupoints changes when patients are in  
18 a diseased state, [6 32 33] and that the degree of change in the PPT may reflect the intensity of  
19 acupoint sensitization, and may be related to the disease status.[34] This proposed observational  
20 study will increase knowledge of the different types of acupoint sensitization and the cutoff values  
21 for this sensitization in patients with NP.  
22  
23

24 As this will be the first study, to our knowledge, to evaluate the association between acupoint  
25 sensitization and NP, this observational study may have some limitations. The main limitation is  
26 that in order to reduce the bias caused by other factors and to ensure consistency, this study will  
27 include only patients with nontraumatic NP with mobility deficits, and will exclude patients with  
28 other types of NP (such as radiating neck pain or secondary NP). Furthermore, because the four  
29 participating centers are located in four different regions in China, it may be difficult to implement  
30 quality control; thus, quality control reviews will be performed every 3 months.  
31  
32

33 In conclusion, this article describes the design and protocol of a study that aims to observe the  
34 different types of sensitization (e.g. temperature, tenderness) and the distribution of sensitized  
35 acupoints in patients with NP, to analyze the cutoff values for acupoint sensitization, and to identify  
36 the dominant sensitized forms of the sensitized points. The results will provide a basis for selecting  
37 clinically-optimal acupuncture points for NP.  
38  
39  
40  
41  
42  
43  
44  
45  
46  
47  
48  
49  
50  
51  
52  
53  
54  
55  
56  
57  
58  
59  
60

## **Acknowledgments**

1  
2  
3 We thank the staff of Chengdu CTC Tianfu Digital Technology Inc. for providing images. We  
4 acknowledge the help and contributions from the subjects, investigators, and experts in each center.  
5  
6 We thank Jane Charbonneau, DVM, from Liwen Bianji, Edanz Group China  
7  
8 (www.liwenbianji.cn/ac), for editing the English text of a draft of this manuscript.  
9  
10  
11  
12

### 13 **Authors' contributions**

14  
15 MSS, SYT, JRP, DJC, CXY, HZ, LZ, and FRL participated in the design of the trial, in creating the  
16 data analysis plan, and in drafting the manuscript. GYG, XSM, MXY, and JC collected the  
17 information needed for the performance of this trial in each center. All of the authors discussed,  
18 read, and revised the manuscript, and gave final approval for the publication of this study protocol.  
19  
20  
21  
22

### 23 **Funding**

24  
25 This work was financially supported by the National Natural Science Foundation of China (no.  
26  
27 81590950, 81590951, 81722050).  
28  
29  
30  
31  
32

### 33 **Competing interests**

34 The authors declare that they have no competing interests.  
35  
36  
37  
38

### 39 **Ethics approval**

40 The study protocol has been approved by the institutional review board and ethics committee of the  
41 First Affiliated Hospital of Chengdu University of Traditional Chinese Medicine (May 2018).  
42  
43  
44  
45

### 46 **Provenance and peer review**

47 Not commissioned; internally peer reviewed.  
48  
49  
50  
51

### 52 **Open Access**

53 This is an Open Access article distributed in accordance with the Creative Commons Attribution  
54 Non Commercial (CCBY-NC 3.0) license, which permits others to distribute, remix, adapt, build  
55 upon this work noncommercially, and license their derivative works on different terms, provided  
56 the original work is properly cited and the use is non-commercial. See: <http://>  
57  
58  
59  
60

creativecommons.org/licenses/by-nc/3.0/

## REFERENCES

1. Fejer R, Kyvik KO, Hartvigsen J. The prevalence of neck pain in the world population: a systematic critical review of the literature. *European spine journal : official publication of the European Spine Society, the European Spinal Deformity Society, and the European Section of the Cervical Spine Research Society* 2006;**15**(6):834-48 doi: 10.1007/s00586-004-0864-4[published Online First: Epub Date]].
2. Guidelines for grading diagnosis and treatment of cervical spondylosis in Anhui Province, China (安徽省颈椎病分级诊疗指南) . *Anhui Medical Journal* 2017;**38**(9)
3. White AR, Ernst E. A systematic review of randomized controlled trials of acupuncture for neck pain. *Rheumatology (Oxford, England)* 1999;**38**(2):143-7
4. Mejuto-Vazquez MJ, Salom-Moreno J, Ortega-Santiago R, et al. Short-term changes in neck pain, widespread pressure pain sensitivity, and cervical range of motion after the application of trigger point dry needling in patients with acute mechanical neck pain: a randomized clinical trial. *The Journal of orthopaedic and sports physical therapy* 2014;**44**(4):252-60 doi: 10.2519/jospt.2014.5108[published Online First: Epub Date]].
5. Irnich D, Behrens N, Gleditsch JM, et al. Immediate effects of dry needling and acupuncture at distant points in chronic neck pain: results of a randomized, double-blind, sham-controlled crossover trial. *Pain* 2002;**99**(1-2):83-9
6. Yan CQ, Zhang S, Li QQ, et al. Detection of peripheral and central sensitisation at acupoints in patients with unilateral shoulder pain in Beijing: a cross-sectional matched case-control study. *BMJ open* 2017;**7**(6):e014438 doi: 10.1136/bmjopen-2016-014438[published Online First: Epub Date]].
7. Luo YN, Zhou YM, Zhong X, et al. Observation of Pain-Sensitive Points in Patients with Knee Osteoarthritis: A Pilot Study. *European Journal of Integrative Medicine* 2018
8. Chen RX, Kang MF. Acupoint heat-sensitization and its clinical significance. *Journal of Traditional Chinese Medicine* 2006;**2001**(4):488-9
9. Yao ZL, Liu F, Song NC. 40 Cases of Neck Type of Cervical Spondylosis Treated by Acupotomy Based on the Theory of Trigger point(基于激痛点理论应用针刀治疗颈型颈椎病 40 例). *Zhongguo zhen jiu = Chinese acupuncture & moxibustion* 2016;**36**(11):1155-55
10. Zhang H, Xu N, Huang R, et al. Heat-Sensitive Moxibustion in Treatment of Cervical Spondylosis. *Liaoning Journal of Traditional Chinese Medicine* 2016(12):2631-34
11. Xiao L, Meng X, Du S, et al. Therapeutic Observation of Heavy-dose Moxibustion at Sha-petechiae for Neck-type Cervical Spondylosis Due to Cold Coagulation and Blood Stagnation. *Shanghai Journal of Acupuncture and Moxibustion* 2017(11):1336-39
12. von Elm E, Altman DG, Egger M, et al. Strengthening the Reporting of Observational Studies in Epidemiology (STROBE) statement: guidelines for reporting observational studies. *BMJ (Clinical research ed)* 2007;**335**(7624):806-8 doi: 10.1136/bmj.39335.541782.AD[published Online First: Epub Date]].
13. Croft PR, Lewis M, Papageorgiou AC, et al. Risk factors for neck pain: a longitudinal study in the general population. *Pain* 2001;**93**(3):317-25
14. Falla D, Lindstrøm R, Rechter L, et al. Effectiveness of an 8-week exercise programme on pain and

- specificity of neck muscle activity in patients with chronic neck pain: A randomized controlled study. *European Journal of Pain* 2013;**17**(10):1517-28
15. Cagnie B, Castelein B, Pollie F, et al. Evidence for the Use of Ischemic Compression and Dry Needling in the Management of Trigger Points of the Upper Trapezius in Patients with Neck Pain: A Systematic Review. *American journal of physical medicine & rehabilitation* 2015;**94**(7):573-83 doi: 10.1097/phm.000000000000266[published Online First: Epub Date]].
16. Ring EF, Ammer K. Infrared thermal imaging in medicine. *Physiological measurement* 2012;**33**(3):R33-46 doi: 10.1088/0967-3334/33/3/r33[published Online First: Epub Date]].
17. Adamczyk JG, Krasowska I, Boguszewski D, et al. The use of thermal imaging to assess the effectiveness of ice massage and cold-water immersion as methods for supporting post-exercise recovery. *Journal of thermal biology* 2016;**60**:20-5 doi: 10.1016/j.jtherbio.2016.05.006[published Online First: Epub Date]].
18. Neto MLP, Maciel LYS, Cruz KML, et al. Does electrode placement influence tens-induced antihyperalgesia in experimental inflammatory pain model? *Brazilian journal of physical therapy* 2017;**21**(2):92-99 doi: 10.1016/j.bjpt.2017.03.003[published Online First: Epub Date]].
19. Yamamoto S, Ono H, Kume K, et al. Oxaliplatin treatment changes the function of sensory nerves in rats. *Journal of pharmacological sciences* 2016;**130**(4):189-93 doi: 10.1016/j.jphs.2015.12.004[published Online First: Epub Date]].
20. Chen Y, Yao Y, Wu Y, et al. Transcutaneous electric acupoint stimulation alleviates remifentanyl-induced hyperalgesia in patients undergoing thyroidectomy: a randomized controlled trial. *International journal of clinical and experimental medicine* 2015;**8**(4):5781-7
21. Beissner F, Brandau A, Henke C, et al. Quick discrimination of A(delta) and C fiber mediated pain based on three verbal descriptors. *PloS one* 2010;**5**(9):e12944 doi: 10.1371/journal.pone.0012944[published Online First: Epub Date]].
22. Persson AL, Brogårdh C, Sjölund BH. Tender or not tender: test-retest repeatability of pressure pain thresholds in the trapezius and deltoid muscles of healthy women. *Journal of rehabilitation medicine* 2004;**36**(1):17
23. Fischer AA. Pressure algometry over normal muscles. Standard values, validity and reproducibility of pressure threshold. *Pain* 1987;**30**(1):115-26
24. Chiu TT, Lam TH, Hedley AJ. Subjective health measure used on Chinese patients with neck pain in Hong Kong. *Spine* 2001;**26**(17):1884-9
25. Burckhardt CS, Jones KD. Adult measures of pain: The McGill Pain Questionnaire (MPQ), Rheumatoid Arthritis Pain Scale (RAPS), Short - Form McGill Pain Questionnaire (SF - MPQ), Verbal Descriptive Scale (VDS), Visual Analog Scale (VAS), and West Haven - Yale Multidisciplinary Pain. *Arthritis Care & Research* 2010;**49**(S5):0-0
26. Chen R, Kang M. Acupoint Heat-Sensitization and Its Clinical Significance. *Journal of Traditional Chinese Medicine* 2006;**2001**(4):488-9
27. Chow SC, Shao J, Wang H. *Sample size calculations in clinical research*. New York: Marcel Dekker, 2003.
28. Hoy D, March L, Woolf A, et al. The global burden of neck pain: estimates from the global burden of disease 2010 study. *Annals of the rheumatic diseases* 2014;**73**(6):968
29. Zhang S, Wang W, Zou L, et al. [Acupoints heat-sensitive moxibustion in the application of traditional Chinese surgery]. *Zhongguo zhen jiu = Chinese acupuncture & moxibustion* 2016;**36**(1):109-12
30. Zhou S, Yin H, Huai M. Progress and Prospect of the Study on the Correlation Mechanism of Surface

- 1  
2  
3 and Visceral Phase. *Acupuncture Research* 1982(02)  
4  
5 31. Shui YL, Institute QH, Pasadena. Infrared imaging system as a versatile diagnostic and auxiliary  
6 treatment tool in Chinese Medicine.  
7  
8 32. Chen S, Miao Y, Nan Y, et al. The Study of Dynamic Characteristic of Acupoints Based on the Primary  
9 Dysmenorrhea Patients with the Tenderness Reflection on Dijì (SP 8). *Evidence-Based  
10 Complementray and Alternative Medicine*,2015,(2015-6-16) 2015;**2015**:158012  
11  
12 33. Chae Y, Kim HY, Lee HJ, et al. The alteration of pain sensitivity at disease-specific acupuncture points  
13 in premenstrual syndrome. *Journal of Physiological Sciences* 2007;**57**(2):115-19  
14  
15 34. Tunks E, Crook J, Norman G, et al. Tender points in fibromyalgia. *Pain* 1988;**34**(1):11  
16  
17  
18  
19  
20  
21  
22  
23  
24  
25  
26  
27  
28  
29  
30  
31  
32  
33  
34  
35  
36  
37  
38  
39  
40  
41  
42  
43  
44  
45  
46  
47  
48  
49  
50  
51  
52  
53  
54  
55  
56  
57  
58  
59  
60

**Figure 1** Flowchart of the study design.

**Figure 2** The test regions and acupoints that will be used in the study.





45 Flowchart of the study design.

46 53x89mm (600 x 600 DPI)

1  
2  
3  
4  
5  
6  
7  
8  
9  
10  
11  
12  
13  
14  
15  
16  
17  
18  
19  
20  
21  
22  
23  
24  
25  
26  
27  
28  
29  
30  
31  
32  
33  
34  
35  
36  
37  
38  
39  
40  
41  
42  
43  
44  
45  
46  
47  
48  
49  
50  
51  
52  
53  
54  
55  
56  
57  
58  
59  
60



The test regions and acupoints that will be used in the study.

90x71mm (600 x 600 DPI)

## STROBE Statement—checklist of items that should be included in reports of observational studies

|                           | Item No. | Recommendation                                                                                      | Page No. | Relevant text from manuscript                                                                                                                                                                                                                                                                                                                                                                                               |
|---------------------------|----------|-----------------------------------------------------------------------------------------------------|----------|-----------------------------------------------------------------------------------------------------------------------------------------------------------------------------------------------------------------------------------------------------------------------------------------------------------------------------------------------------------------------------------------------------------------------------|
| <b>Title and abstract</b> | 1        | (a) Indicate the study's design with a commonly used term in the title or the abstract              | 1        | a multicenter, matched, case-control study                                                                                                                                                                                                                                                                                                                                                                                  |
|                           |          | (b) Provide in the abstract an informative and balanced summary of what was done and what was found | 2        | The present study aims to identify the types of sensitization (e.g. temperature, tenderness) and distribution of sensitized points in patients with NP, to analyze the cutoff values and sensitization rate for acupoint sensitization in patients, and to summarize the dominant forms of optimal sensitized points in patients. This information will be helpful in the choice of optimal points for the treatment of NP. |
| <b>Introduction</b>       |          |                                                                                                     |          |                                                                                                                                                                                                                                                                                                                                                                                                                             |
| Background/rationale      | 2        | Explain the scientific background and rationale for the investigation being reported                | 3        | Recent Chinese research has found that acupoints can be sensitized, with associated changes in function and size, and thus can functionally switch from a relatively 'silent' state to a relatively 'active' state. Treatment of an acupoint while it is in the 'active' state is thought to achieve a better clinical outcome, and this has become a focus in acupoint research.[6-8] There are                            |

1  
2  
3  
4  
5  
6  
7  
8  
9  
10  
11  
12  
13  
14  
15  
16  
17  
18  
19  
20  
21  
22  
23  
24  
25  
26  
27  
28  
29  
30  
31  
32  
33  
34  
35  
36  
37  
38  
39  
40  
41  
42  
43  
44  
45  
46

For peer review only

diverse types of sensitivity manifested at sensitized points, including pain-sensitivity, heat-sensitivity, and form-sensitivity (appearance changes). Recent clinical studies report that a superior outcome is obtained using acupuncture at pain-sensitive points,[9] and moxibustion at heat-sensitive points[10] or visual-sensitive points.[11] However, most of the current observational studies have only focused on one form of sensitization in a small sample population, and thus are not comprehensive studies of various forms of sensitization.[6 10] The choice of optimal treatment points for NP in clinical practice is still controversial.

Objectives 3 State specific objectives, including any prespecified hypotheses 4

We describe the protocol for an observational study that aims to identify the different types of sensitization (e.g. temperature, tenderness) and the distribution of sensitized acupoints in patients with NP, to analyze the cutoff values for acupoint sensitization in patients with NP, and to determine the most optimal sensitization types seen at sensitized points in patients with NP. We believe that in the

state of disease, the sensitive points occurs with high frequency (manifested as changes in temperature, pain threshold etc), and the sensitive points of different sensitizations will overlap, and the final optimal points from overlap may be closely related to the selection of clinical treatment points. And the different sensations of point may suggest selection of interventions. Previous small sample studies have confirmed the feasibility of sensitization testing.[7] The present study will provide a basis for the selection of the optimal treatment points for NP in clinical practice.

---

## Methods

|              |   |                                                                                                                                 |     |                                                                                                                                                                                                     |
|--------------|---|---------------------------------------------------------------------------------------------------------------------------------|-----|-----------------------------------------------------------------------------------------------------------------------------------------------------------------------------------------------------|
| Study design | 4 | Present key elements of study design early in the paper                                                                         | 4   | This is a multicenter, age- and sex-matched, case-control study. The protocol was developed in accordance with the Strengthening the Reporting of Observational Studies in Epidemiology guidelines. |
| Setting      | 5 | Describe the setting, locations, and relevant dates, including periods of recruitment, exposure, follow-up, and data collection | 5,6 | We will recruit patients from the outpatient departments of Acupuncture and Moxibustion, and Orthopedics in five clinical centers in China: Chengdu University of                                   |

1  
2  
3  
4  
5  
6  
7  
8  
9  
10  
11  
12  
13  
14  
15  
16  
17  
18  
19  
20  
21  
22  
23  
24  
25  
26  
27  
28  
29  
30  
31  
32  
33  
34  
35  
36  
37  
38  
39  
40  
41  
42  
43  
44  
45  
46

For peer review only

Traditional Chinese Medicine, Hunan University of Traditional Chinese Medicine, Shaanxi University of Traditional Chinese Medicine, Shanxi University of Traditional Chinese Medicine, and Guiyang College of Traditional Chinese Medicine. Healthy subjects without neck or shoulder pain will comprise age- and sex-matched residents from the same communities as the patients. Recruitment strategies will include posting advertisements on social media (such as WeChat, which is similar to Facebook) and at community centers, or by word-of-mouth introductions through subjects already enrolled in the study.

Participants 6 (a) *Cohort study*—Give the eligibility criteria, and the sources and methods of selection of participants. Describe methods of follow-up  
*Case-control study*—Give the eligibility criteria, and the sources and methods of case ascertainment and control selection. Give the rationale for the choice of cases and controls  
*Cross-sectional study*—Give the eligibility criteria, and the sources and methods of selection of participants

4, 5, 9, 10

Patients are eligible for study inclusion if they: (1) have no history of NP and/or restricted neck movement; (2) are males or females aged 18–60 years; (3) provide written informed consent for all procedures in this study. Patients or healthy subjects who consent to study participation will be examined and diagnosed by a hospital doctor.

(b) *Cohort study*—For matched studies, give matching criteria and number of exposed and

5, 9, 10

Healthy subjects are eligible if

1  
2  
3  
4  
5  
6  
7  
8  
9  
10  
11  
12  
13  
14  
15  
16  
17  
18  
19  
20  
21  
22  
23  
24  
25  
26  
27  
28  
29  
30  
31  
32  
33  
34  
35  
36  
37  
38  
39  
40  
41  
42  
43  
44  
45  
46

unexposed

*Case-control study*—For matched studies, give matching criteria and the number of controls per case

they: (1) have no history of neck pain and/or restricted neck movement; (2) are males or females aged 18–60 years; (3) provide written informed consent for all procedures in this study. Healthy subjects without neck or shoulder pain will comprise age- and sex-matched residents from the same communities as the patients. A ratio of control subjects to cases of 1.

|                              |    |                                                                                                                                                                                      |     |                                                                                                                                                                                                                                                                                                                                                                                                                                          |
|------------------------------|----|--------------------------------------------------------------------------------------------------------------------------------------------------------------------------------------|-----|------------------------------------------------------------------------------------------------------------------------------------------------------------------------------------------------------------------------------------------------------------------------------------------------------------------------------------------------------------------------------------------------------------------------------------------|
| Variables                    | 7  | Clearly define all outcomes, exposures, predictors, potential confounders, and effect modifiers. Give diagnostic criteria, if applicable                                             | 7-9 | Body surface temperature, Mechanical pain threshold, Pressure pain threshold, Skin resistance, Pain, Neck function, General demographic information, Safety and adverse events.                                                                                                                                                                                                                                                          |
| Data sources/<br>measurement | 8* | For each variable of interest, give sources of data and details of methods of assessment (measurement). Describe comparability of assessment methods if there is more than one group | 7-9 | Body surface temperature: Each participant will be evaluated in a room with a constant temperature of 26°C. Investigators will use Fotric thermal imaging cameras (Fotric 226, IRS Systems Inc., Allen, TX, USA) to make measurements at each of the 29 acupoints in the five body regions. The temperature data of each point on the images will be analyzed using professional software (AnalyzeIR, IRS Systems Inc., Allen, TX, USA). |

1  
2  
3  
4  
5  
6  
7  
8  
9  
10  
11  
12  
13  
14  
15  
16  
17  
18  
19  
20  
21  
22  
23  
24  
25  
26  
27  
28  
29  
30  
31  
32  
33  
34  
35  
36  
37  
38  
39  
40  
41  
42  
43  
44  
45  
46

---

Mechanical pain threshold:  
Investigators will use the electronic Von Frey esthesiometer (type 2390, IITC Life Science, Woodland Hills, CA, USA) to make two measurements of the mechanical pain threshold at each of the 29 acupoints in the five body regions in turn. If there is a difference of more than 15 g between the two measurements of mechanical pain threshold made at one acupoint, the mechanical pain threshold at that acupoint will be measured a third time. Progressive pressure will be applied at a rate of 10 g/s at each acupoint. The average mechanical pain threshold will be calculated for each acupoint. To reduce the consecutive assessment error for two adjacent points, a method of alternate assessment of acupoints on the left and right sides of the body will be adopted.

Pressure pain threshold:  
Investigators will use the FDIX Force Gauge (Force One™ FDIX, Wagner Instruments, Greenwich, CT, USA) to make two measurements of the PPT at each of the 29 acupoints in the five body regions in turn. If there is a

---



1  
2  
3  
4  
5  
6  
7  
8  
9  
10  
11  
12  
13  
14  
15  
16  
17  
18  
19  
20  
21  
22  
23  
24  
25  
26  
27  
28  
29  
30  
31  
32  
33  
34  
35  
36  
37  
38  
39  
40  
41  
42

---

difference of more than 500 gf between the two PPT measurements performed at one acupoint, the PPT at that acupoint will be measured a third time. Progressive pressure will be applied at a rate of 100 gf/s at each acupoint. The average PPT will be calculated for each acupoint. A method of alternate assessment of the acupoints on the left and right sides of the body will again be adopted.

Skin resistance: Investigators will use the Acupoint dynamics research instrument (LMR30-RIII, Peking University, Beijing, China) to record the skin resistance at nine acupoints (GB-21, GB-20, BL-11, LI-10, SI-3; bilateral) and at the two most sensitive points (if there are two sensitive points).

Pain: Neck pain will be measured using the Visual Analogue Scale, the Northwick Park Neck Pain Questionnaire, and the McGill Pain Questionnaire. The Visual Analogue Scale will be used to measure the severity of pain. The Northwick Park Neck Pain Questionnaire provides a reliable outcome measure for patients with

neck pain, while the McGill Pain Questionnaire is used to measure the different qualities of the subjective pain experience; these questionnaires have been proven valid, and are convenient for patients to complete.

Neck function: The change in neck function will be evaluated by measuring the cervical range of motion before and after treatment.

General demographic information This will include the collection of data regarding age, disease duration, medical history, and medication type and dosage.

Safety and adverse events: Non-invasive assessments of the body surface do not generally cause adverse events. However, we will still record the number and type (e.g. serious pain, fainting) of adverse events in each group.

Participants who experience adverse events will receive the appropriate intervention. Adverse events will be immediately reported to the primary investigator and the ethics committee, and the affected participants will be withdrawn from the study.

|      |   |                                                           |           |                               |
|------|---|-----------------------------------------------------------|-----------|-------------------------------|
| Bias | 9 | Describe any efforts to address potential sources of bias | 6, 10, 11 | All investigators will attend |
|------|---|-----------------------------------------------------------|-----------|-------------------------------|

training to make sure all practices are standardized. And the investigator was not told whether the subject was a patient or a healthy controls.

Data will be blinded, double-entered in EpiData 3.1 software, and adequately checked for errors. To ensure the integrity of the study and protect the rights and health of the participants, we will set up a Data and Safety Monitoring Board. Every 3 months, members of the quality control group will conduct a quality control review at each study site, and produce a report regarding the quality analysis of the whole data collection process.

Study size 10 Explain how the study size was arrived at

9

Previous study indicated that the rate of acupoint sensitization in patients ranged from 20% to 70%[26], so we set this rate at 50% to calculate the minimum sample size required for the proposed study. With acupoint sensitization rate of 20% in healthy subjects, the odds ratio is 4. According to Chow's formula in comparing two sample proportion[27], we assumed an  $\alpha$  level of 0.05, a  $\beta$  of 0.01, a delta of 0.3 (50%-20%=30%), thus, the smallest sample size is 408 with

1  
2  
3  
4  
5  
6  
7  
8  
9  
10  
11  
12  
13  
14  
15  
16  
17  
18  
19  
20  
21  
22  
23  
24  
25  
26  
27  
28  
29  
30  
31  
32  
33  
34  
35  
36  
37  
38  
39  
40  
41  
42  
43  
44  
45  
46

|                        |    |                                                                                                                              |    |                                                                                                                                                                                                                                                                                                                                                                                                                                                                                                                                                                                         |
|------------------------|----|------------------------------------------------------------------------------------------------------------------------------|----|-----------------------------------------------------------------------------------------------------------------------------------------------------------------------------------------------------------------------------------------------------------------------------------------------------------------------------------------------------------------------------------------------------------------------------------------------------------------------------------------------------------------------------------------------------------------------------------------|
|                        |    |                                                                                                                              |    | two-sided confidence and a ratio of control subjects to cases of 1 (TrialSize package in R software). Considering the potential non-response rate and sampling effectiveness as 10%, the final sample size is 448 (224 patients, plus 224 age- and sex-matched healthy subjects).                                                                                                                                                                                                                                                                                                       |
| Quantitative variables | 11 | Explain how quantitative variables were handled in the analyses. If applicable, describe which groupings were chosen and why | 10 | Parametric statistical testing (t-test) will be used for data that are normally distributed; otherwise, non-parametric statistical testing (Wilcoxon’s signed rank test) will be used.                                                                                                                                                                                                                                                                                                                                                                                                  |
| Statistical methods    | 12 | (a) Describe all statistical methods, including those used to control for confounding                                        | 10 | First, the distribution of basic information in the case and control groups will be described, including age, sex, height, weight, job occupation, and education level. Data will be presented as means (SD) for continuous variables, and as frequency (percentage) for categorical variables. The distributions of sensitized points will be shown in scatter plots to represent the skin morphological changes. The distributions of the intensity of NP and neck function will also be described. Hypothetical testing will then be performed to assess the differences between the |

1  
2  
3  
4  
5  
6  
7  
8  
9  
10  
11  
12  
13  
14  
15  
16  
17  
18  
19  
20  
21  
22  
23  
24  
25  
26  
27  
28  
29  
30  
31  
32  
33  
34  
35  
36  
37  
38  
39  
40  
41  
42  
43  
44  
45  
46

case and control groups in body surface sensations and biophysical properties, including body surface temperature, mechanical pain threshold, PPT, and skin resistance. Parametric statistical testing (t-test) will be used for data that are normally distributed; otherwise, non-parametric statistical testing (Wilcoxon's signed rank test) will be used. If there is a difference between the case and control groups in body surface temperature, mechanical pain threshold, PPT, or skin resistance, the cut-off values for these indexes to distinguish between sensitive and non-sensitive states (including heat-sensitivity, pain-sensitivity, and electrical-sensitivity) will be detected using receiver operating characteristic curve analyses. Finally, the acupoint sensitization rates of patients and healthy subjects will be calculated separately regarding the aspects of heat, pain, and electrical sensitivity to identify the most important form of sensitivity for all acupoints. Meanwhile, OR represents the ratio of acupoint sensitization of patients and healthy subjects. Therefore, this study

|                   |     |                                                                                                                                                                                                                                                                                                           |     |                                                                                                                                        |
|-------------------|-----|-----------------------------------------------------------------------------------------------------------------------------------------------------------------------------------------------------------------------------------------------------------------------------------------------------------|-----|----------------------------------------------------------------------------------------------------------------------------------------|
|                   |     |                                                                                                                                                                                                                                                                                                           |     | combines OR and sensitization rate of all acupoints to find out the optimal points in each sensitization.                              |
|                   |     | (b) Describe any methods used to examine subgroups and interactions                                                                                                                                                                                                                                       | N/A |                                                                                                                                        |
|                   |     | (c) Explain how missing data were addressed                                                                                                                                                                                                                                                               | 10  | Missing data will be processed without imputation.                                                                                     |
|                   |     | (d) <i>Cohort study</i> —If applicable, explain how loss to follow-up was addressed<br><i>Case-control study</i> —If applicable, explain how matching of cases and controls was addressed<br><i>Cross-sectional study</i> —If applicable, describe analytical methods taking account of sampling strategy | 5,6 | Healthy subjects without neck or shoulder pain will comprise age- and sex-matched residents from the same communities as the patients. |
|                   |     | (e) Describe any sensitivity analyses                                                                                                                                                                                                                                                                     | N/A |                                                                                                                                        |
| <b>Results</b>    |     |                                                                                                                                                                                                                                                                                                           |     |                                                                                                                                        |
| Participants      | 13* | (a) Report numbers of individuals at each stage of study—eg numbers potentially eligible, examined for eligibility, confirmed eligible, included in the study, completing follow-up, and analysed                                                                                                         | N/A |                                                                                                                                        |
|                   |     | (b) Give reasons for non-participation at each stage                                                                                                                                                                                                                                                      | N/A |                                                                                                                                        |
|                   |     | (c) Consider use of a flow diagram                                                                                                                                                                                                                                                                        | N/A |                                                                                                                                        |
| Descriptive data  | 14* | (a) Give characteristics of study participants (eg demographic, clinical, social) and information on exposures and potential confounders                                                                                                                                                                  | N/A |                                                                                                                                        |
|                   |     | (b) Indicate number of participants with missing data for each variable of interest                                                                                                                                                                                                                       | N/A |                                                                                                                                        |
|                   |     | (c) <i>Cohort study</i> —Summarise follow-up time (eg, average and total amount)                                                                                                                                                                                                                          | N/A |                                                                                                                                        |
| Outcome data      | 15* | <i>Cohort study</i> —Report numbers of outcome events or summary measures over time                                                                                                                                                                                                                       | N/A |                                                                                                                                        |
|                   |     | <i>Case-control study</i> —Report numbers in each exposure category, or summary measures of exposure                                                                                                                                                                                                      | N/A |                                                                                                                                        |
|                   |     | <i>Cross-sectional study</i> —Report numbers of outcome events or summary measures                                                                                                                                                                                                                        | N/A |                                                                                                                                        |
| Main results      | 16  | (a) Give unadjusted estimates and, if applicable, confounder-adjusted estimates and their precision (eg, 95% confidence interval). Make clear which confounders were adjusted for and why they were included                                                                                              | N/A |                                                                                                                                        |
|                   |     | (b) Report category boundaries when continuous variables were categorized                                                                                                                                                                                                                                 | N/A |                                                                                                                                        |
|                   |     | (c) If relevant, consider translating estimates of relative risk into absolute risk for a meaningful time period                                                                                                                                                                                          | N/A |                                                                                                                                        |
| Other analyses    | 17  | Report other analyses done—eg analyses of subgroups and interactions, and sensitivity analyses                                                                                                                                                                                                            | N/A |                                                                                                                                        |
| <b>Discussion</b> |     |                                                                                                                                                                                                                                                                                                           |     |                                                                                                                                        |

|    |                          |    |                                                                                                                                                                            |        |
|----|--------------------------|----|----------------------------------------------------------------------------------------------------------------------------------------------------------------------------|--------|
| 1  |                          |    |                                                                                                                                                                            |        |
| 2  | Key results              | 18 | Summarise key results with reference to study objectives                                                                                                                   | N/A    |
| 3  |                          |    |                                                                                                                                                                            |        |
| 4  | Limitations              | 19 | Discuss limitations of the study, taking into account sources of potential bias or imprecision. Discuss both direction and magnitude of any potential bias                 | 11, 12 |
| 5  |                          |    |                                                                                                                                                                            |        |
| 6  |                          |    |                                                                                                                                                                            |        |
| 7  |                          |    |                                                                                                                                                                            |        |
| 8  |                          |    |                                                                                                                                                                            |        |
| 9  |                          |    |                                                                                                                                                                            |        |
| 10 |                          |    |                                                                                                                                                                            |        |
| 11 |                          |    |                                                                                                                                                                            |        |
| 12 |                          |    |                                                                                                                                                                            |        |
| 13 |                          |    |                                                                                                                                                                            |        |
| 14 |                          |    |                                                                                                                                                                            |        |
| 15 |                          |    |                                                                                                                                                                            |        |
| 16 |                          |    |                                                                                                                                                                            |        |
| 17 |                          |    |                                                                                                                                                                            |        |
| 18 |                          |    |                                                                                                                                                                            |        |
| 19 |                          |    |                                                                                                                                                                            |        |
| 20 |                          |    |                                                                                                                                                                            |        |
| 21 |                          |    |                                                                                                                                                                            |        |
| 22 | Interpretation           | 20 | Give a cautious overall interpretation of results considering objectives, limitations, multiplicity of analyses, results from similar studies, and other relevant evidence | N/A    |
| 23 |                          |    |                                                                                                                                                                            |        |
| 24 |                          |    |                                                                                                                                                                            |        |
| 25 | Generalisability         | 21 | Discuss the generalisability (external validity) of the study results                                                                                                      | 3      |
| 26 |                          |    |                                                                                                                                                                            |        |
| 27 |                          |    |                                                                                                                                                                            |        |
| 28 |                          |    |                                                                                                                                                                            |        |
| 29 |                          |    |                                                                                                                                                                            |        |
| 30 |                          |    |                                                                                                                                                                            |        |
| 31 |                          |    |                                                                                                                                                                            |        |
| 32 |                          |    |                                                                                                                                                                            |        |
| 33 |                          |    |                                                                                                                                                                            |        |
| 34 |                          |    |                                                                                                                                                                            |        |
| 35 |                          |    |                                                                                                                                                                            |        |
| 36 |                          |    |                                                                                                                                                                            |        |
| 37 |                          |    |                                                                                                                                                                            |        |
| 38 | <b>Other information</b> |    |                                                                                                                                                                            |        |
| 39 | Funding                  | 22 | Give the source of funding and the role of the funders for the present study and, if applicable, for the original study on which the present article is based              | 12     |
| 40 |                          |    |                                                                                                                                                                            |        |
| 41 |                          |    |                                                                                                                                                                            |        |
| 42 |                          |    |                                                                                                                                                                            |        |
| 43 |                          |    |                                                                                                                                                                            |        |
| 44 |                          |    |                                                                                                                                                                            |        |
| 45 |                          |    |                                                                                                                                                                            |        |
| 46 |                          |    |                                                                                                                                                                            |        |

Science Foundation of China (no. 81590950, 81590951, 81722050).

\*Give information separately for cases and controls in case-control studies and, if applicable, for exposed and unexposed groups in cohort and cross-sectional studies.

**Note:** An Explanation and Elaboration article discusses each checklist item and gives methodological background and published examples of transparent reporting. The STROBE checklist is best used in conjunction with this article (freely available on the Web sites of PLoS Medicine at <http://www.plosmedicine.org/>, Annals of Internal Medicine at <http://www.annals.org/>, and Epidemiology at <http://www.epidem.com/>). Information on the STROBE Initiative is available at [www.strobe-statement.org](http://www.strobe-statement.org).

For peer review only
